# Supplementary material for: Stoic beliefs and health: development and preliminary validation of the Pathak-Wieten Stoicism Ideology Scale
Source: PubMed Central journal article supplement — BMJ Open. 2017 Nov 14;7(11):e015137. doi: 10.1136/bmjopen-2016-015137 (PMC5695468; doi:10.1136/bmjopen-2016-015137), 2017-11-14
Supplement: bmjopen-2016-015137.draft_revisions.pdf [file bmjopen-2016-015137.draft_revisions.pdf]

# BMJ Open

BMJ Open is committed to open peer review. As part of this commitment we make the peer review history of every article we publish publicly available.

When an article is published we post the peer reviewers' comments and the authors' responses online. We also post the versions of the paper that were used during peer review. These are the versions that the peer review comments apply to.

The versions of the paper that follow are the versions that were submitted during the peer review process. They are not the versions of record or the final published versions. They should not be cited or distributed as the published version of this manuscript.

BMJ Open is an open access journal and the full, final, typeset and author-corrected version of record of the manuscript is available on our site with no access controls, subscription charges or pay-per-view fees (<http://bmjopen.bmj.com>).

If you have any questions on BMJ Open's open peer review process please email [editorial.bmjopen@bmj.com](mailto:editorial.bmjopen@bmj.com)

# BMJ Open

## A Theory of Self for Understanding Health Behavior: Development and Preliminary Validation of the Pathak- Wieten Stoicism Ideology Scale

|                                    |                                                                                                                                                                                                 |
|------------------------------------|-------------------------------------------------------------------------------------------------------------------------------------------------------------------------------------------------|
| Journal:                           | <i>BMJ Open</i>                                                                                                                                                                                 |
| Manuscript ID                      | bmjopen-2016-015137                                                                                                                                                                             |
| Article Type:                      | Research                                                                                                                                                                                        |
| Date Submitted by the Author:      | 10-Nov-2016                                                                                                                                                                                     |
| Complete List of Authors:          | Pathak, Elizabeth; University of South Florida, Morsani College of Medicine<br>Wieten, Sarah<br>Wheldon, Christopher; University of South Florida, Department of<br>Community and Family Health |
| <b>Primary Subject<br>Heading</b>: | Patient-centred medicine                                                                                                                                                                        |
| Secondary Subject Heading:         | Epidemiology, Health services research, Research methods, Public health                                                                                                                         |
| Keywords:                          | stoicism, help-seeking, health behavior theories, masculinity, patient<br>perspectives, gender                                                                                                  |
|                                    |                                                                                                                                                                                                 |

SCHOLARONE™  
Manuscripts

1  
2  
3  
4  
5  
6  
7  
8  
9  
10  
11  
12  
13  
14  
15  
16  
17  
18  
19  
20  
21  
22  
23  
24  
25  
26  
27  
28  
29  
30  
31  
32  
33  
34  
35  
36  
37  
38  
39  
40  
41  
42  
43  
44  
45  
46  
47  
48  
49

**A Theory of Self for Understanding Health Behavior:  
Development and Preliminary Validation of the  
Pathak-Wieten Stoicism Ideology Scale**

**Elizabeth Barnett Pathak, PhD, MSPH, FAHA**  
Department of Internal Medicine  
Morsani College of Medicine, University of South Florida

**Sarah Wieten, MA**  
Department of Philosophy  
Durham University, United Kingdom

**Christopher Wheldon, PhD**  
Department of Community and Family Health  
College of Public Health, University of South Florida

**Acknowledgements:** The authors are grateful to the respondents for their voluntary participation in this study.

**Contributors:** EBP conceived the study. EBP and SW developed the preliminary PW-SIS. All authors enrolled participants and collected questionnaire data. CW contributed statistical expertise to the confirmatory factor analysis. EBP analyzed the data. All authors interpreted the results and outlined the paper. EBP drafted the manuscript. All authors contributed to literature review and substantive revisions to the paper.

**Funding:** This study was unfunded.

1  
2  
3 **Competing Interests:** The authors have no competing interests.  
4

5 **Data Sharing:** No additional data available.  
6  
7  
8  
9  
10  
11  
12  
13  
14  
15  
16  
17  
18  
19  
20  
21  
22  
23  
24  
25  
26  
27  
28  
29  
30  
31  
32  
33  
34  
35  
36  
37  
38  
39  
40  
41  
42  
43  
44  
45

For peer review only

**ABSTRACT**

**Introduction:** We theorize that patients who strongly endorse a personal ideology of stoicism will be more likely to avoid or delay seeking professional medical intervention for serious signs and symptoms of disease. Core elements of stoicism are imperviousness to strong emotions, indifference to death, taciturnity, and self-sufficiency. We developed and validated a multi-domain scale to assess stoic ideologies.

**Methods:** During 2013-2014, 390 adults aged 18+ years completed a brief anonymous paper questionnaire containing the preliminary 24-item 5-domain Pathak-Wieten Stoicism Ideology Scale (PW-SIS). Confirmatory factor analysis (CFA) was used to test the *a priori* theoretical model. Content validity and response distributions were examined. Socio-demographic predictors of strong endorsement of stoicism were explored with logistic regression.

**Results:** The final PW-SIS contains 4 conceptual domains and 12 items. CFA showed very good model fit: RMSEA = 0.05 (95% CI 0.04-0.07), Goodness-of-Fit Index = 0.96 and Tucker-Lewis Index = 0.93. Cronbach's alpha was 0.78 and ranged from 0.64 to 0.71 for the sub-scales. Content validity analysis showed a statistically significant trend, with respondents who reported trying to be a stoic "all of the time" having the highest PW-SIS scores. Men were over two times as likely as women to fall into the top quartile of responses (OR=2.30, 95% CI 1.44 to 3.68,  $p < 0.001$ ). Odds ratios showing stronger endorsement of stoicism by Hispanics, Blacks, and Biracial persons were not statistically significant.

**Discussion:** The PW-SIS is a valid and theoretically coherent scale which is brief and practical for integration into a wide range of empirical research studies.

## Strengths and Limitations

- The Pathak-Wieten Stoicism Ideology Scale (PW-SIS) is a new, theoretically coherent, multi-dimensional scale which demonstrates good psychometric properties and content validity in a large sample (n=390) of educated adults.
- The PW-SIS contains 12 items and 4 domains: Stoic Taciturnity, Stoic Endurance, Stoic Serenity, and Stoic Death Indifference.
- Mean stoicism ideology scores were higher for men than women, but for both genders the most frequent scores were neutral on stoic ideology, and the response distributions by gender overlapped almost completely.
- Further validation of the PW-SIS in demographically and socioeconomically diverse populations is needed.

For peer review only

## INTRODUCTION

In this paper, we outline a theory of illness behavior and help-seeking reluctance and present the conceptual development and empirical validation of a measurement tool to facilitate new research. We theorize that patients who strongly endorse a **personal ideology of stoicism** will be more likely to avoid or delay seeking professional medical intervention for serious signs and symptoms of disease. Each year thousands of individuals suffer needlessly and many die because of extended delays in seeking professional aid for acute medical conditions (e.g., myocardial infarctions, strokes, diabetic emergencies, cancer complications and pain, and acute exacerbations of congestive heart failure).<sup>1-8</sup> Numerous studies have been conducted to attempt to elucidate the reasons behind patient delays,<sup>2-7,9</sup> with the ultimate goal of designing education programs and interventions that will result in timely help-seeking. Significant risk factors for help-seeking reluctance have been identified (e.g. Black race<sup>8,10,11</sup>) but much of the variation remains unexplained and we still lack a complete understanding of *why* certain patients and not others delay seeking aid.

Given the rise of patient-centered health care,<sup>12,13</sup> understanding patients' motivations and perspectives has never been more important. The current health education paradigm holds that improving patients' knowledge of symptoms and signs will result in more timely help-seeking behavior.<sup>14-17</sup> A distinction of our theory is movement of the focus of inquiry away from the disease and the patient's relationship to the disease (e.g. health knowledge, symptom awareness, ability to comply with self-care regimens) and onto **patients' sense of self** – their self-concepts and self-identity.<sup>18</sup> We hypothesize that illness behaviors may become “noncompliant” or “irrational” or “self-harming” when specific courses of action would create an internal conflict with patients' ideas of **who they are**. Specifically, we posit that people who strongly believe that they should manage their problems on their own, not show emotions, and not complain about physical discomfort will experience an internal cognitive conflict when faced with a situation that could require help from others. This internal conflict will lead to delays in or avoidance of help-seeking, with potentially life-threatening consequences. For example, empirical studies of increasing rates of male suicide in rural Australia have identified hegemonic masculine norms of stoicism as an important causal factor in the context of severe economic stress.<sup>19,20</sup>

1  
2  
3  
4  
5  
6  
7  
8  
9  
10  
11  
12  
13  
14  
15  
16  
17  
18  
19  
20  
21  
22  
23  
24  
25  
26  
27  
28  
29  
30  
31  
32  
33  
34  
35  
36  
37  
38  
39  
40  
41  
42  
43  
44  
45  
46  
47  
48  
49

Stoicism is a school of philosophy which originated in ancient Greece.<sup>21-23</sup> Core elements in the classical definition of stoicism were an idealization of imperviousness to strong emotions, and an indifference to death.<sup>23</sup> Major Asian philosophical systems of thought, such as Buddhism and Confucianism, also endorsed stoic principles and teachings.<sup>24,25</sup> From the 19<sup>th</sup> century onward, academic and popular philosophers in Europe and the Americas have been exposed to and influenced by Asian philosophy and religion. Therefore, it may not always be possible to distinguish whether particular strands of contemporary thought associated with stoicism originated in ancient Greece, ancient India, or elsewhere. For example, using very different language and symbolism, both the Greek Stoics and the Buddha exhorted the student to live fully and completely in the present, while minimizing concern about the future. Contemporary meanings and connotations of stoicism have expanded beyond their ancient origins, to include ideals of taciturnity and self-sufficiency.<sup>26-28</sup> Today, personal ideologies, values and behaviors which fall under the umbrella of stoicism are commonplace across many industrial nations, and are evident in many non-Western cultures as well.<sup>29-32</sup> In the USA, the armed forces have explicitly embraced stoic ideology as a tool for mitigating combat stress.<sup>33,34</sup>

The purpose of our study was to develop a theoretically coherent multi-item, multi-dimensional scale to assess endorsement of a personal ideology of stoicism, and to empirically validate this scale in a multiethnic sample of healthy community-dwelling adults. We present the results of confirmatory factor analysis of the multi-domain Pathak-Wieten Stoicism Ideology Scale (PW-SIS), and discuss the potential usefulness of this tool for investigating constraints in health-related help-seeking behaviors.

## METHODS

### Conceptual Development of the Stoicism Ideology Scale

Drawing on multiple scholarly and popular sources,<sup>21-23,26,35-38</sup> we developed the preliminary 24-item Stoicism Ideology Scale (PW-SIS) to capture endorsement of 5 dimensions of stoicism (see Table S1 in the Technical Supplement, available online). We defined each domain as follows:



1  
2 *Stoic Taciturnity* is the belief that one should conceal one's problems and emotions from others.

3 *Stoic Endurance* is the belief that one should endure physical suffering without complaining.

4 *Stoic Composure* is the belief that one should control one's emotions and behavior under stress.

5 *Stoic Serenity* is the belief that one should refrain from experiencing strong emotions.

6 *Stoic Death Indifference* is the belief that one should not fear or avoid death.  
7  
8

9  
10 Each item in our scale was carefully worded to capture the respondents' ideology, not their past behavior, using a 5-point Likert response scale with the  
11 following responses: "disagree" (-2), "somewhat disagree" (-1), "not sure" (0), "somewhat agree" (+1), and "agree" (+2). An average score of 0  
12 corresponds to a neutral stance – neither endorsement nor rejection of stoicism. Positive scores indicate endorsement of a stoic ideology, while negative  
13 scores indicate rejection of a stoic ideology. Nine of the original 24 items were "reverse" items that specified anti-stoic beliefs, i.e. "I believe I should  
14 experience strong emotions."  
15  
16  
17  
18  
19

## 20 21 22 23 **Data Collection**

24  
25 This study was approved by the Institutional Review Board (IRB) of the University of South Florida, and informed consent was obtained from all  
26 participants. Study participants were recruited in person by the authors and provided verbal informed consent. Written consent forms were waived by  
27 the IRB to ensure respondent anonymity. Each participant completed a brief paper-and-pencil questionnaire consisting of the 24-item preliminary PW-  
28 SIS, socio-demographic questions, and a final single item "I try to be a stoic" with a 7-item response scale ranging from "never" to "all the time." The  
29 study population consisted of a convenience sample of 390 university students, staff, and faculty aged 18 years and older. Data were collected over a  
30 period of 10 months during 2013-2014.  
31  
32  
33  
34  
35  
36  
37  
38  
39  
40  
41

## 42 **Data Analyses**

1  
2 Data analysis proceeded in 5 steps. During Step 1, we examined univariate response distributions for each of the 24 scale items. A simple  
3 correlation matrix was examined to identify redundant items. Finally, we assessed content validity based on agreement with the statement “I try to be a  
4 stoic.” As a result of Step 1 analyses, 6 items were dropped from further analyses - including the entire Stoic Composure domain.  
5  
6  
7

8  
9 During Step 2, we conducted a confirmatory factor analysis (CFA) of the reduced 18-item PW-SIS. CFA is the appropriate analytic choice to test  
10 scales that have an *a priori*, theoretically explicit sub-domain structure.<sup>39-43</sup> We used SAS 9.4 for all statistical analyses. We chose an oblique (as opposed  
11 to orthogonal) rotation method (promax) because under our theoretical model the correlations among the underlying factors was not assumed to be  
12 zero. Based on the results of the first CFA, we eliminated 2 items with poor factor loadings.  
13  
14  
15  
16

17  
18 During Step 3, we repeated the CFA on the reduced 16-item PW-SIS. Finally, for the purpose of parsimony we further reduced the total number  
19 of scale items to 12 (3 items in each of 4 domains) and conducted a CFA on the final 12-item version of the PW-SIS (Step 4). Additional details and  
20 rationale for analytic Steps 1-4, including data tables S1-S3, are provided in the Technical Supplement, available online.  
21  
22  
23  
24

25 Step 5 of our analysis consisted of preliminary content validation, examination of response distributions for the overall and domain scores, and  
26 exploratory logistic regression modeling of socio-demographic predictors of strong endorsement of stoicism.  
27  
28  
29  
30

## 31 RESULTS

32  
33 The size of our study population (n=390) provided more than 15 respondents for each question in the preliminary scale, which exceeds the  
34 widely accepted norm of at least 10 respondents per question.<sup>44</sup> Although skewed toward younger adults (78% of respondents were < 25 years old), the  
35 study population was in other respects diverse. A majority self-identified as female (57%) and white (55%). Hispanics (15%) and Blacks (14%) were the  
36 second and third largest racial/ethnic groups, followed by Asians (9%) and biracial or other ethnicity (6%). A substantial minority of respondents (19%)  
37 were born outside the U.S or Puerto Rico.  
38  
39  
40  
41  
42  
43  
44  
45

1  
2 The final 4-domain, 12-item Pathak-Wieten Stoicism Ideology Scale is shown in Table 1. Confirmatory factor analysis of the final scale showed  
3  
4 very good model fit with individual item factor loadings ranging from 0.48 to 0.76, RMSEA = 0.05 (95% CI 0.04-0.07), Goodness-of-Fit Index = 0.96 and  
5  
6 Tucker-Lewis Index = 0.93.  
7

8 Relationships among the PW-SIS and its four conceptual domains are shown in Table 2. Cronbach's alpha ranged from 0.64 to 0.71 for the sub-  
9  
10 scales and was 0.78 for the 12-item PW-SIS. Scores for Stoic Taciturnity were strongly correlated with scores for both Stoic Endurance and Stoic Serenity,  
11  
12 but Stoic Endurance and Stoic Serenity were not highly correlated with each other. Stoic Death Indifference had the highest (most stoic) mean scores  
13  
14 among the four domains, and it was least correlated with the other three domains.  
15  
16

17 Figure 1 depicts mean PW-SIS scores by response to the statement "I try to be a stoic." There was a clear monotonic and statistically significant  
18  
19 trend, with respondents who reported trying to be a stoic "all of the time" having the highest stoicism scores, and respondents who reported trying to  
20  
21 be a stoic "never" having the lowest stoicism scores. Most respondents chose one of the 3 intermediate categories. Respondents who chose "I don't  
22  
23 know" as their response had stoicism scores similar to those who said they "sometimes" tried to be a stoic.  
24  
25  
26

27 The distributions of mean scores for the 4 conceptual domain sub-scales are shown in Figure 2. Domain scores are comprised of the mean score  
28  
29 for the 3 questions in the domain. In this study population, respondents were least likely to endorse Stoic Serenity and most likely to endorse Stoic  
30  
31 Death Indifference.  
32  
33

34 The full distribution of respondent scores is shown separately for women and men in Figure 3. The distributions overlapped almost completely,  
35  
36 but there were no men with the least stoic scores, and no women with the most stoic scores. Response distributions were skewed to the left for women  
37  
38 (less stoic) and to the right for men (more stoic), consistent with a statistically significant difference in the mean scores for women (-0.31, 95% CI -0.40 to  
39  
40 -0.22) and men (+0.04, 95% CI -0.05 to +0.14).  
41  
42  
43  
44  
45

1  
2 Results of an exploratory analysis of sociodemographic predictors of high endorsement of stoicism are shown in Table 3. There is no *a priori*  
3  
4 cutpoint designated as “highly stoic” in the PW-SIS; in this analysis the cutpoint used was a mean score greater than the 75<sup>th</sup> percentile of the overall  
5  
6 response distribution. Men were over two times as likely as women to fall into the top quartile of responses (OR=2.30, 95% CI 1.44 to 3.68, p<0.001).  
7  
8 Adults born in the USA or Puerto Rico were also twice as likely as adults born elsewhere to strongly endorse stoicism (OR=1.97, 95% CI 1.01 to 3.84,  
9  
10 p=0.048). Odds ratios showing stronger endorsement of stoicism by Hispanics, Blacks, and Biracial persons were not statistically significant.  
11  
12  
13  
14  
15  
16  
17

## 18 DISCUSSION

19  
20 The Pathak-Wieten Stoicism Ideology Scale is a theoretically coherent, multi-dimensional scale which demonstrates good psychometric  
21  
22 properties and content validity based on initial validation in a large sample of educated adults. The PW-SIS is also brief and practical for integration into a  
23  
24 wide range of empirical research studies. In our study population of mostly younger adults, endorsement of stoicism varied by conceptual domain, with  
25  
26 the weakest endorsement of the classical domain Stoic Serenity (aversion to strong emotions). Exploratory logistic regression analysis identified male  
27  
28 gender and USA birth as significant predictors of strong endorsement of stoicism. Notably, for both genders the most frequent scores were in the middle  
29  
30 of the distribution (neutral on stoic ideology), and the response distributions for women and men overlapped almost completely. Finally, point estimates  
31  
32 suggested higher endorsement of stoicism for Blacks, Hispanics, and Biracial persons compared with Whites, but these results were not statistically  
33  
34 significant.  
35  
36  
37  
38  
39

## 40 Theoretical Context

1  
2 In 1983, Kathy Charmaz published a very influential sociological study on the “loss of self” suffered by people with chronic illnesses.<sup>45</sup> Although  
3  
4 stoicism *per se* was mentioned only briefly, the idea that the suffering caused by disease emerges as much (or more) from threats to a person’s identity  
5  
6 and sense of self as from purely bodily experiences of pathophysiology is one of the theoretical underpinnings of our work.  
7

8  
9 In this study, we have attempted to articulate an explicit theory of stoicism and its potential impact on health. We take the standpoint that  
10  
11 stoicism is a system for self-regulation rather than a behavior or personality trait. As a guide to ideal self-conduct, it requires self-conscious  
12  
13 implementation and regular enforcement; in other words, stoicism is an ideology (e.g. a belief system which informs one’s attitudes and actions with the  
14  
15 inherent potential for internal resistance and conflict). We posit that people who strongly endorse a personal ideology of stoicism have a set of  
16  
17 expectations about who they are, what they should do, and what they should not do. This personal ideology of self will not mandate behavior in a  
18  
19 deterministic fashion; rather, stoicism will create expectations of ideal behavior (which may not always be met).  
20  
21

22  
23 Ironically, a personal ideology of stoicism almost guarantees failure to live up to one’s personal ideal. Experiences of illness and disease often  
24  
25 involve transient weakness and functional limitations. With aging, these experiences will increase in frequency, duration, and severity for most people.  
26  
27 Simply put, experiences of illness and disease tend to require aid – whether from health professionals in a formal context, or from family members or  
28  
29 friends in an informal context. An ideology of stoicism creates an internal resistance to an external (“objective”) need, which can lead to negative  
30  
31 consequences. For example, a study of major strain among family caretakers of elderly dementia patients found that those who used stoicism as a  
32  
33 coping strategy suffered burnout, while those who sought social support did not.<sup>46</sup>  
34  
35

36  
37 Future integration of our theory of a stoic ideology of the self into existing health behavior models could help explain the formation of beliefs  
38  
39 and attitudes toward criterion-specific help-seeking behaviors. Reasoned action approaches - such as the Integrative Model of Behavior Prediction -  
40  
41 poorly define background factors that underlie belief formation.<sup>14</sup> Measurement of self-concepts, such as stoicism ideologies, may help explain this  
42  
43  
44  
45

1  
2 population variability. Expanding health behavior theory to include aspects of the self could also help inform health education messaging and risk-based  
3  
4 communication.  
5  
6  
7

### 8 **Previous Research on Stoicism and Health**

10  
11 Much of the previous health-related research which mentions stoicism has invoked the term as a descriptor of particular patient groups or  
12 behaviors, without an explicit theoretical context.<sup>28</sup> Stoicism is mentioned most frequently in studies related to pain (particularly cancer pain) and coping  
13 strategies; indeed stoicism has been labeled a “coping strategy” in more than one study.<sup>26-28,38,47</sup> Stoicism has also been invoked as a defining  
14 characteristic of masculinity and as a key explanatory factor for certain health behaviors and outcomes among men. There are several psychometric  
15 instruments that measure endorsement or adherence to social norms of masculinity. However, the conceptual and measurement overlap between our  
16 4-domain scale and these instruments is minor.<sup>48</sup> For example, in the widely used Personal Attributes Questionnaire, only 2 of 24 items relate to a single  
17 domain of the PW-SIS. The Conformance to Masculine Norms scale assesses 11 distinct domains of masculinity, of which only 2 (emotional control and  
18 self-reliance) overlap with domains of the PW-SIS.<sup>49</sup>  
19  
20  
21  
22  
23  
24  
25  
26  
27  
28

29  
30 Direct measurement of stoicism in previous scales has implicitly defined stoicism as a pattern of behaviors, not as an ideology. The pain attitudes  
31 questionnaire (PAQ), published in 2001, has a brief subset of questions focused on stoic responses to physical pain.<sup>50-52</sup> The stoicism items in this scale  
32 were designed to capture pain coping strategies of chronically ill or injured patients. Of the 29 items in the PAQ, only 2 were explicitly focused on  
33 ideology: #2 “When I am in pain I should keep it to myself,” and #24 “Pain is something that should be ignored.” The 20-item Liverpool Stoicism Scale  
34 (LSS) (Table 1) was published in 1995<sup>53</sup> and has not been widely used.<sup>54-57</sup> The majority of items in the LSS focus on behavior or conduct, e.g. “I tend not  
35 to express my emotions.” However, there are 3 items that are ideological, e.g. “One should keep a ‘stiff upper lip’.” Both the LSS and the PAQ contain  
36 statements that are aphorisms (i.e. “Pain is something that should be ignored”) or proverbs (i.e. “A problem shared is a problem halved”). We consider  
37  
38  
39  
40  
41  
42  
43  
44  
45

1 these formats problematic, because these statements do not refer explicitly to the respondent. Consequently agreement cannot be interpreted as a  
2  
3 reflection of self-identity. Furthermore, aphorisms and proverbs may invite endorsement to a great extent simply because of familiarity. In fact, Yong et  
4  
5 al found that item #24 “Pain is something that should be ignored” on the PAQ had a low alpha and reduced the internal consistency of their scale.<sup>51</sup>  
6  
7

### 10 **Strengths of the PW-SIS**

11  
12 Our scale has several strengths. First, all items refer explicitly to the respondent; there are no aphorisms or proverbs. Second, each item refers to  
13  
14 an expectation or belief about ideal self-conduct, rather than to a simple description of past behavior. So for example, Q5 states “I expect myself to  
15  
16 manage my physical discomfort without complaining” rather than “I always manage my physical discomfort without complaining.” This distinction is  
17  
18 critical to the theoretical underpinnings of the scale. Thirdly, we deliberately chose not to mention disease or illness in the scale items, so that the scale  
19  
20 would be appropriate for a wide range of study populations. (Although some items do explicitly mention “physical pain” and “everyday aches and  
21  
22 pains.”) Our intention was to capture the respondents’ *global* endorsement of stoicism as a *code of ideal conduct*. Finally, the PW-SIS does not reference  
23  
24 gender norms, so it can serve as a tool to empirically investigate gender differences in stoic ideology.  
25  
26  
27  
28  
29  
30  
31

### 32 **Directions for future research**

33  
34 The PW-SIS should be validated in multiple study populations with a range of socioeconomic and demographic characteristics. Our theory that  
35  
36 ideologies of stoicism will result in constraints on health-related behaviors needs to be empirically tested, ideally in rigorously designed prospective  
37  
38 studies. Hegemonic assumptions about gender and stoicism (“stoic men” and “emotional women”) can be empirically investigated using the PW-SIS.  
39  
40 Understanding the influences of race, ethnicity, socioeconomic status, religion, and other cultural factors on stoic ideologies may help explain past  
41  
42  
43  
44  
45  
46  
47  
48  
49

1  
2 research findings on delays in help-seeking. Finally, there may also be positive health consequences of stoic ideologies for individuals, which careful  
3  
4 empirical research could also reveal.  
5  
6  
7  
8  
9  
10  
11  
12  
13  
14  
15  
16  
17  
18  
19  
20  
21  
22  
23  
24  
25  
26  
27  
28  
29  
30  
31  
32  
33  
34  
35  
36  
37  
38  
39  
40  
41  
42  
43  
44  
45  
46  
47  
48  
49

For peer review only



**Table 1. Pathak-Wieten Stoicism Ideology Scale (PW-SIS)**

Please read each statement and choose the answer that best reflects your own views.

|               |                        |              |                     |            |
|---------------|------------------------|--------------|---------------------|------------|
| Disagree (-2) | Somewhat Disagree (-1) | Not Sure (0) | Somewhat Agree (+1) | Agree (+2) |
|---------------|------------------------|--------------|---------------------|------------|

| Item                                                                                | Domain                   | Original Item #* |
|-------------------------------------------------------------------------------------|--------------------------|------------------|
| 1. I expect myself to hide my aches and pains from others.                          | Stoic Endurance          | Q2               |
| 2. I don't believe in talking about my personal problems.                           | Stoic Taciturnity        | Q3               |
| 3. I expect myself to manage my physical discomfort without complaining.            | Stoic Endurance          | Q5               |
| 4. I believe I should experience strong emotions. <i>[reverse code]</i>             | Stoic Serenity           | Q8               |
| 5. When the time for my death comes, I believe I should accept it without fear.     | Stoic Death Indifference | Q12              |
| 6. I expect myself to hide my strong emotions from others.                          | Stoic Taciturnity        | Q13              |
| 7. I would prefer to be unemotional.                                                | Stoic Serenity           | Q14              |
| 8. I expect myself to manage my own problems without help from anyone.              | Stoic Taciturnity        | Q15              |
| 9. I believe my physical pain is best handled by just keeping quiet about it.       | Stoic Endurance          | Q17              |
| 10. I would be very upset if I knew my death was coming soon. <i>[reverse code]</i> | Stoic Death Indifference | Q18              |
| 11. I expect myself to avoid feeling intense emotions.                              | Stoic Serenity           | Q20              |
| 12. I would not allow myself to be bothered by the fear of death.                   | Stoic Death Indifference | Q24              |

\* See Table S1 in the Technical Supplement, available online.

Table 2. Conceptual Domains of the Pathak-Wieten Stoicism Ideology Scale

| Domain                                                                                                                | Mean Score<br>(95% CI)    | Cronbach's<br>$\alpha$ | Correlation<br>with<br>ST Score | Correlation<br>with<br>SE Score | Correlation<br>with<br>SS Score | Correlation<br>with<br>SDI Score |
|-----------------------------------------------------------------------------------------------------------------------|---------------------------|------------------------|---------------------------------|---------------------------------|---------------------------------|----------------------------------|
| <b>Stoic Taciturnity (ST):</b><br>The belief that one should conceal one's problems and emotions from others (Modern) | -0.08<br>(-0.18 to +0.02) | 0.71                   | 1.00                            | 0.59<br>$p < 0.0001$            | 0.53<br>$p < 0.0001$            | 0.09<br>$p = 0.0729$             |
| <b>Stoic Endurance (SE):</b><br>The belief that one should endure physical suffering without complaining (Modern)     | +0.04<br>(-0.06 to +0.13) | 0.65                   | 0.59<br>$p < 0.0001$            | 1.00                            | 0.35<br>$p < 0.0001$            | 0.18<br>$p = 0.0005$             |
| <b>Stoic Serenity (SS):</b><br>The belief that one should refrain from experiencing strong emotions (Classical)       | -0.66<br>(-0.75 to -0.56) | 0.64                   | 0.53<br>$p < 0.0001$            | 0.35<br>$p < 0.0001$            | 1.00                            | 0.15<br>$p = 0.0031$             |
| <b>Stoic Death Indifference (SDI):</b><br>The belief that one should not fear or avoid death (Classical)              | +0.08<br>(-0.03 to +0.18) | 0.69                   | 0.09<br>$p = 0.0729$            | 0.18<br>$p = 0.0005$            | 0.15<br>$p = 0.0031$            | 1.00                             |
| <b>Stoicism Ideology Scale (PW-SIS)</b>                                                                               | -0.16<br>(-0.22 to -0.09) | 0.78                   | 0.79<br>$p < 0.0001$            | 0.74<br>$p < 0.0001$            | 0.72<br>$p < 0.0001$            | 0.53<br>$p < 0.0001$             |

1  
2  
3  
4  
5  
6  
7  
8  
9  
10  
11  
12  
13  
14  
15  
16  
17  
18  
19  
20  
21  
22  
23  
24  
25  
26  
27  
28  
29  
30  
31  
32  
33  
34  
35  
36  
37  
38  
39  
40  
41  
42  
43  
44  
45  
46  
47  
48  
49

**Table 3. Sociodemographic Predictors of a Mean PW-SIS Score in the Top Quartile (> 0.167)**

|                        | Odds Ratio<br>(95% CI) | p value |
|------------------------|------------------------|---------|
| <b>Age 18-24 years</b> | 1.00 (referent)        |         |
| <b>Age 25-73 years</b> | 1.34 (0.76 - 2.35)     | n.s.    |
| <b>Men</b>             | 2.30 (1.44 - 3.68)     | < 0.001 |
| <b>Women</b>           | 1.00 (referent)        |         |
| <b>Asian</b>           | 0.93 (0.38 - 2.25)     | n.s.    |
| <b>Black</b>           | 1.55 (0.78 - 3.09)     | n.s.    |
| <b>Biracial/Other</b>  | 1.70 (0.66 - 4.34)     | n.s.    |
| <b>Hispanic</b>        | 1.88 (0.99 - 3.56)     | n.s.    |
| <b>Whites</b>          | 1.00 (referent)        |         |
| <b>Born in the USA</b> | 1.97 (1.01 - 3.84)     | 0.048   |
| <b>Born elsewhere</b>  | 1.00 (referent)        |         |

For peer review only

## REFERENCES

1. Go AS, Mozaffarian D, Roger VL, et al. Heart disease and stroke statistics - 2014 update: a report from the American Heart Association. *Circulation*. 2014;129(3):e28-e292.
2. Zock E, Kerkhoff H, Kleyweg RP, van de Beek D. Intrinsic factors influencing help-seeking behavior in an acute stroke situation. *Acta neurologica Belgica*. 2016;116(3):295-301.
3. Mackintosh JE, Murtagh MJ, Rodgers H, Thomson RG, Ford GA, White M. Why people do, or do not, immediately contact emergency medical services following the onset of acute stroke: qualitative interview study. *PLOS One*. 2012;7(10).
4. Davis LL, Mishe IM, Moser DK, Esposito N, Lynn MR, Schwartz TA. Thoughts and behaviors of women with symptoms of acute coronary syndrome. *Heart & lung : the journal of critical care*. 2013;42(6):428-435.
5. Galdas PM, Johnson JL, Percy ME, Ratner PA. Help seeking for cardiac symptoms: beyond the masculine-feminine binary. *Soc Sci Med*. 2010;71(1):18-24.
6. Whitaker KL, Macleod U, Winstanley K, Scott SE, Wardie J. Help seeking for cancer 'alarm' symptoms: a qualitative interview study of primary care patients in the UK. *Br J Gen Pract*. 2015;65(631):e96-e105.
7. Yousaf O, Grunfeld EA, Hunter MS. A systematic review of the factors associated with delays in medical and psychological help-seeking among men. *Health Psychol Rev*. 2015;9(2):264-276.
8. Powell W, Adams LB, Cole-Lewis Y, Agyemang A, Upton RD. Masculinity and race-related factors as barriers to help-seeking among African American men. *Behav Med*. 2016;42(3):150-163.
9. Nymark C, Mattiasson AC, Henriksson P, Kiessling A. The turning point: from self-regulative illness behaviour to care-seeking in patients with an acute myocardial infarction. *Journal of clinical nursing*. 2009;18(23):3358-3365.
10. Lee H, Bahler R, Chung C, Alonzo A, Zeller RA. Prehospital delay with myocardial infarction: the interactive effect of clinical symptoms and race. *Applied nursing research : ANR*. 2000;13(3):125-133.
11. Evangelista LS, Dracup K, Doering LV. Racial differences in treatment-seeking delays among heart failure patients. *Journal of cardiac failure*. 2002;8(6):381-386.
12. Clark AM, Savard LA, Spaling MA, Heath S, Duncan A, Spiers JA. Understanding help-seeking decisions in people with heart failure: a qualitative systematic review. *International journal of nursing studies*. 2012;49(12):1582-1597.
13. Moloczij N, McPherson KM, Smith JF, Kayes NM. Help-seeking at the time of stroke: stroke survivors' perspectives on their decisions. *Health & social care in the community*. 2008;16(5):501-510.
14. Glanz K, Rimer BK, Viswanath K, eds. *Health Behavior: Theory, Research, and Practice (Fifth Edition)*. San Francisco: Jossey-Bass; 2015.
15. Caldwell MA, Miaskowski C. Mass media interventions to reduce help-seeking delay in people with symptoms of acute myocardial infarction: time for a new approach? *Patient Educ Couns*. 2002;46(1):1-9.
16. Lecouturier J, Rodgers H, Murtagh MJ, White M, Ford GA, Thomson RG. Systematic review of mass media interventions designed to improve public recognition of stroke symptoms, emergency response and early treatment. *BMC public health*. 2010;10.
17. Luca NR, Suggs LS. Theory and model use in social marketing health interventions. *Journal of health communication*. 2013;18(1):20-40.
18. Baumeister RF. Self and identity: a brief overview of what they are, what they do, and how they work. *Annals of the New York Academy of Sciences*. 2011;1234:48-55.
19. Alston M. Rural male suicide in Australia. *Soc Sci Med*. 2012;74(4):515-522.

- 1  
2 20. Alston M, Kent J. The big dry: the link between rural masculinities and poor health outcomes for farming men. *Journal of Sociology*. 2008;44(2):133-147.
- 3  
4 21. Epictetus. *Enchiridion*. Long G, trans: Dover Publications; 2004.
- 5 22. Aurelius M. *Meditations*. Long G, trans: Dover Publications; 1997.
- 6 23. Baltzly D. Stoicism. In: Zalta EN, ed. *The Stanford Encyclopedia of Philosophy*. Winter 2010 Edition ed. Palo Alto CA: Stanford University; 2010.
- 7  
8 24. Gowans CW. Medical analogies in Buddhist and Hellenistic thought: tranquility and anger. *Royal Institute of Philosophy Supplement*. 2010;66:11-33.
- 9  
10 25. Wong DB. The meaning of detachment in Daoism, Buddhism, and Stoicism. *Dao: A Journal of Comparative Philosophy*. 2006;5(2):207-219.
- 11  
12 26. Becker LC. Human health and stoic moral norms. *J Med Philos*. 2003;28(2):221-238.
- 13 27. Stempsey WE. A new stoic: the wise patient. *Med Philos*. 2004;29(4):451-472.
- 14 28. Moore A, Grime J, Campbell P, Richardson J. Troubling stoicism: Sociocultural influences and applications to health and illness behaviour. *Health* 2013;17(2):159-173.
- 15  
16 29. Sargent C. Between death and shame: dimensions of pain in Bariba culture. *Soc Sci Med*. 1984;19(12):1299-1304.
- 17 30. Latimer M, Finley GA, Rudderham S, et al. Expression of pain among Mi'kmaq children in one Atlantic Canadian community: a qualitative study. *CMAJ Open*. 2014;2(3):e133-3138.
- 18  
19 31. Te Karu L, Bryant L, Elley CR. Maori experiences and perceptions of gout and its treatment: a kaupapa Maori qualitative study. *J Prim Health Care*. 2013;5(3):214-222.
- 20  
21 32. Caldwell JC, Orubuloye IO, Caldwell P. Underreaction to AIDS in Sub-Saharan Africa. *Soc Sci Med*. 1992;34(11):1169-1182.
- 22 33. Jarrett T. Warrior Resilience Training in Operation Iraqi Freedom: combining rational emotive behavior therapy, resiliency, and positive psychology. *US Army Med Dep J*. 2008 (Jul-Sep):32-38.
- 23  
24 34. Jarrett TA. Warrior Resilience and Thriving (WRT): Rational Emotive Behavior Therapy (REBT) as a Resiliency and Thriving Foundation to Prepare Warriors and Their Families for Combat Deployment and Posttraumatic Growth in Operation Iraqi Freedom, 2005–2009. *J Rat-Emo Cognitive-Behav Ther* 2013;31.
- 25  
26 35. Hammond WP, Matthews D, Mohottige D, Agyemang A, Corbie-Smith G. Masculinity, medical mistrust, and preventive health services delays among community-dwelling African-American men. *Journal of general internal medicine*. 2010;25(12):1300-1308.
- 27  
28 36. Levant RF, Rankin TJ, Williams CM, Hasan NT, Smalley KB. Evaluation of the factor structure and construct validity of scores on the Male Role Norms Inventory—Revised (MRNI-R). *Psychology of Men & Masculinity*. 2010;11(1):25-37.
- 29  
30 37. Wheldon CW, Pathak EB. Masculinity and Relationship Agreements among Male Same-Sex Couples. *Journal of Sex Research*. 2010;47(5):460-470.
- 31  
32 38. Hutnick N, Smith P, Koch T. What does it feel like to be 100? Socio-emotional aspects of well-being in the stories of 16 centenarians living in the United Kingdom. *Aging & mental health*. 2012;16(7):811-818.
- 33  
34 39. Devon HA, Block ME, Moyle-Wright P, et al. A Psychometric Toolbox for Testing Validity and Reliability. *Journal of Nursing Scholarship*. 2007;39(2):155-164.
- 35  
36 40. Fabringer LR, Wegener DT, MacCallum RC, Straham EJ. Evaluating the Use of Exploratory Factor Analysis in Psychological Research. *Psychological Methods*. 1999;4(3):272-299.
- 37  
38 41. Brotherton R, French CC, Pickering AD. Measuring belief in conspiracy theories: the generic conspiracist beliefs scale. *Frontiers in psychology*. 2013;4.
- 39  
40  
41  
42  
43  
44  
45  
46  
47  
48  
49

- 1  
2  
3  
4  
5  
6  
7  
8  
9  
10  
11  
12  
13  
14  
15  
16  
17  
18  
19  
20  
21  
22  
23  
24  
25  
26  
27  
28  
29  
30  
31  
32  
33  
34  
35  
36  
37  
38  
39  
40  
41  
42  
43  
44  
45  
46  
47  
48  
49
42. de Nooijer J, Puijk-Hekman S, van Assema P. The compensatory health beliefs scale: psychometric properties of a cross-culturally adapted scale for use in The Netherlands. *Health education research*. 2009;24(5):811-817.
43. Downey L, Curtis JR, Lafferty WE, Herting JR, Engelberg RA. The Quality of Dying and Death Questionnaire (QODD): empirical domains and theoretical perspectives. *Journal of pain and symptom management*. 2010;39(1):9-22.
44. Tabachnick BG, Fidell LS. *Using Multivariate Statistics*. Boston: Allyn and Bacon; 2001.
45. Charmaz K. Loss of self: a fundamental form of suffering in the chronically ill. *Sociology of Health and Illness*. 1983;5(2):168-195.
46. Almborg B, Grafstrom M, Winblad B. Major strain and coping strategies as reported by family members who care for aged demented relatives. *J Adv Nurs*. 1997;26(4):683-691.
47. Waitzkin H, Britt T, Williams C. Narratives of aging and social problems in medical encounters with older persons. *J Health Soc Behav*. 1994;35(4):322-348.
48. Smiler AP. Thirty years after the discovery of gender: psychological concepts and measures of masculinity. *Sex Roles*. 2004;50(1):15-26.
49. Smiler AP. Conforming to masculine norms: evidence for validity among adult men and women? *Sex Roles*. 2006;54(767-775).
50. Yong HH. Can attitudes of stoicism and cautiousness explain observed age-related variation in levels of self-rated pain, mood disturbance and functional interference in chronic pain patients? *Eur J Pain*. 2006;10(5):399-407.
51. Yong HH, Bell R, Workman B, Gibson SJ. Psychometric properties of the Pain Attitudes Questionnaire (revised) in adult patients with chronic pain. *Pain*. 2003;104(3):673-681.
52. Yong HH, Gibson SJ, Horne DJ, Helme RD. Development of a pain attitudes questionnaire to assess stoicism and cautiousness for possible age differences. *J Gerontol B Psychol Sci Soc Sci*. 2001;56(5):279-284.
53. Wagstaff G, Rowledge A. Stoicism: Its relation to gender, attitude toward poverty, and reactions to emotive material. *Journal of Social Psychology*. 1995;135:181-184.
54. Gaitniece-Putāne A. Liverpool Stoicism Scale Adaptation. *Baltic Journal of Psychology*. 2005;6(1):57-64.
55. Smith AR, Yeager AE, Dodd DR. The joint influence of acquired capability for suicide and stoicism on over-exercise among women. *Eating Behaviors*. 2015;17:77-82.
56. Whealin JM, Kuhn E, Pietrzak RH. Applying behavior change theory to technology promoting veteran mental health care seeking. *Psychological Services*. 2014;11(4):486-494.
57. Witte TK, Gordon KH, Smith PN, Van Orden KA. Stoicism and sensation seeking: male vulnerabilities for the acquired capability for suicide. *Journal of Research in Personality*. 2012;46(4):384-392.

**Figure 1.**  
**Content Validity of the Pathak-Wieten Stoicism Ideology Scale:**  
**Mean Scores by Response to the Statement “I try to be a stoic”**

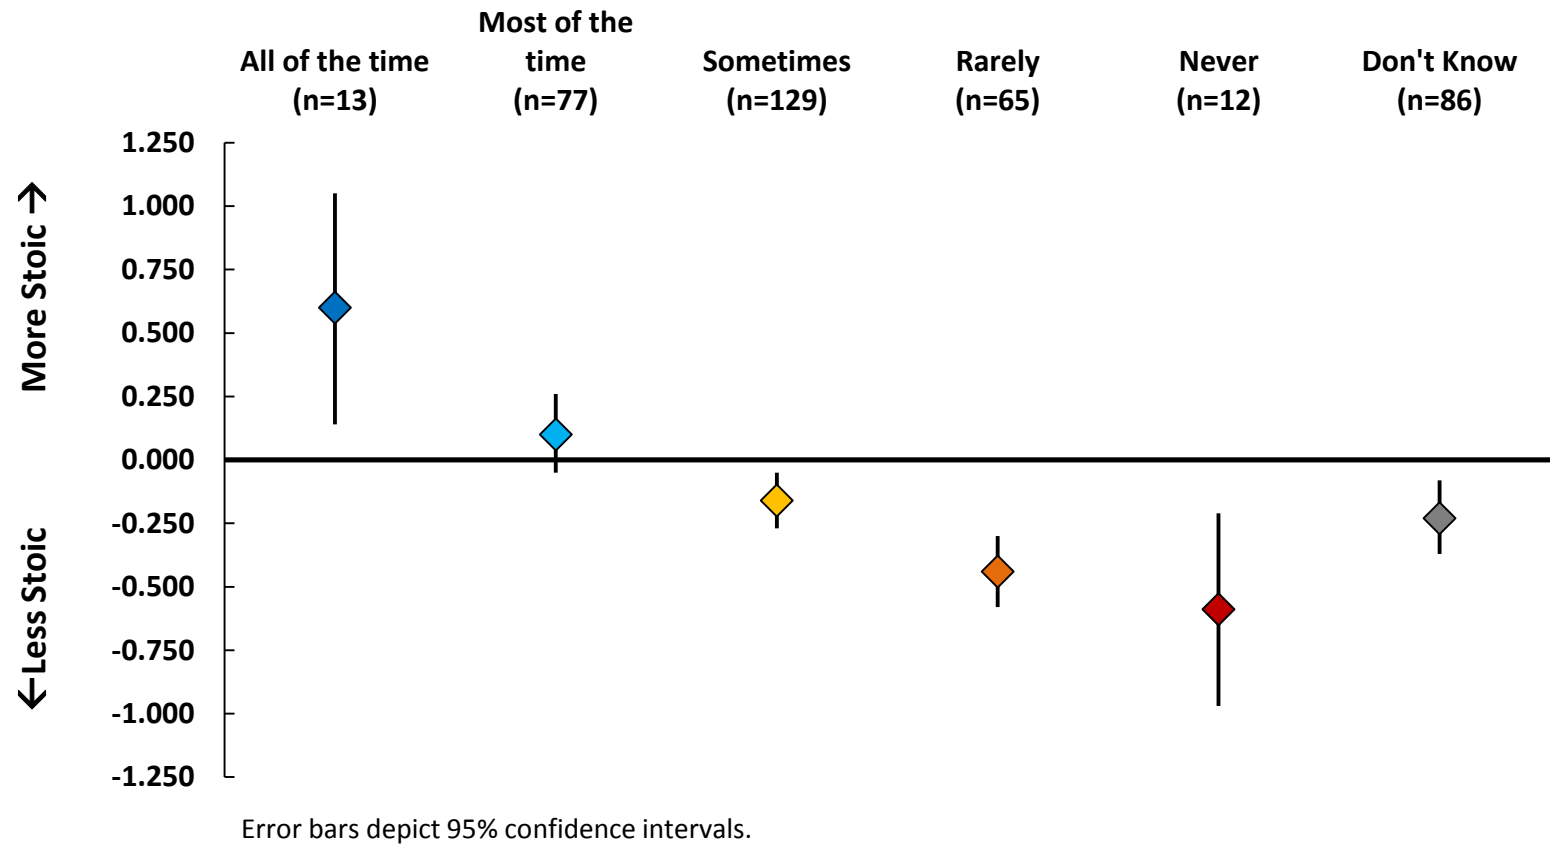

1 **Figure 2.**  
2

3 **Pathak-Wieten Stoicism Ideology Scale: Distribution of Mean Scores by Domain**  
4  
5  
6

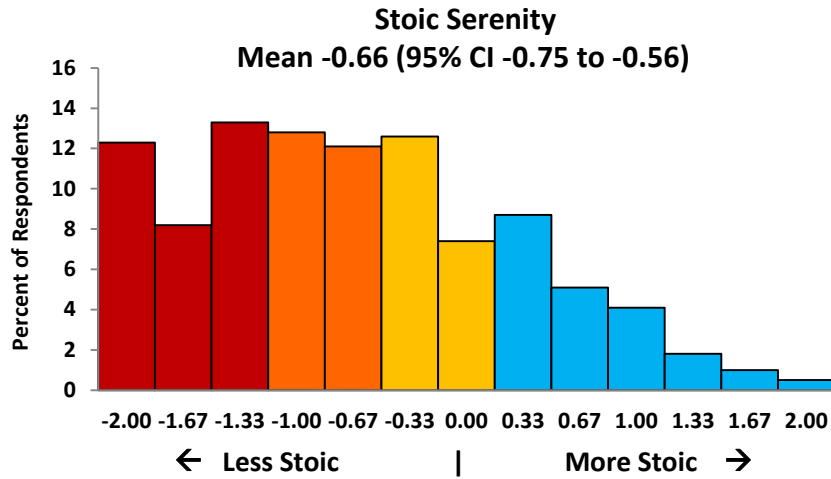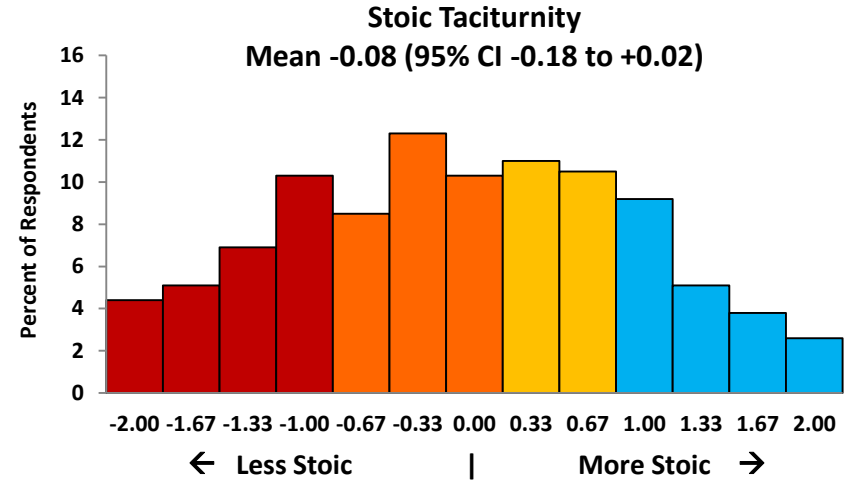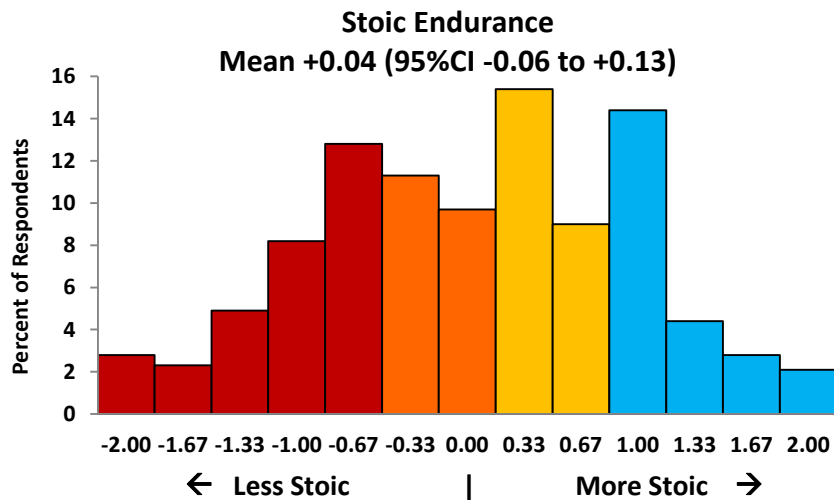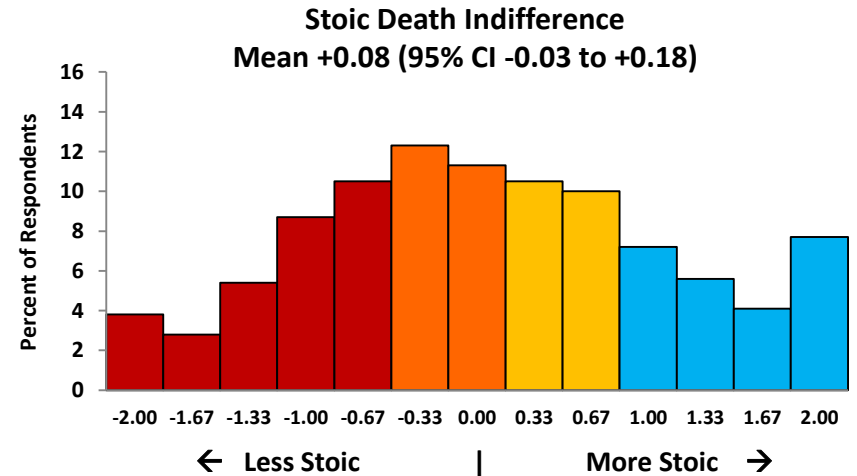

27 For peer review only - <http://bmjopen.bmj.com/site/about/guidelines.xhtml>

28 Red = Quartile 1 Orange = Quartile 2 Yellow = Quartile 3 Blue = Quartile 4

1  
2  
3  
4  
5  
6  
7  
8  
9  
10  
11  
12  
13  
14  
15  
16  
17  
18  
19  
20  
21  
22  
23  
24  
25  
26  
27  
28  
29  
30  
31  
32  
33  
34  
35  
36  
37  
38  
39  
40  
41  
42  
43



Figure 3. Pathak-Wieten Stoicism Ideology Scale: Distribution of Mean Scores by Gender

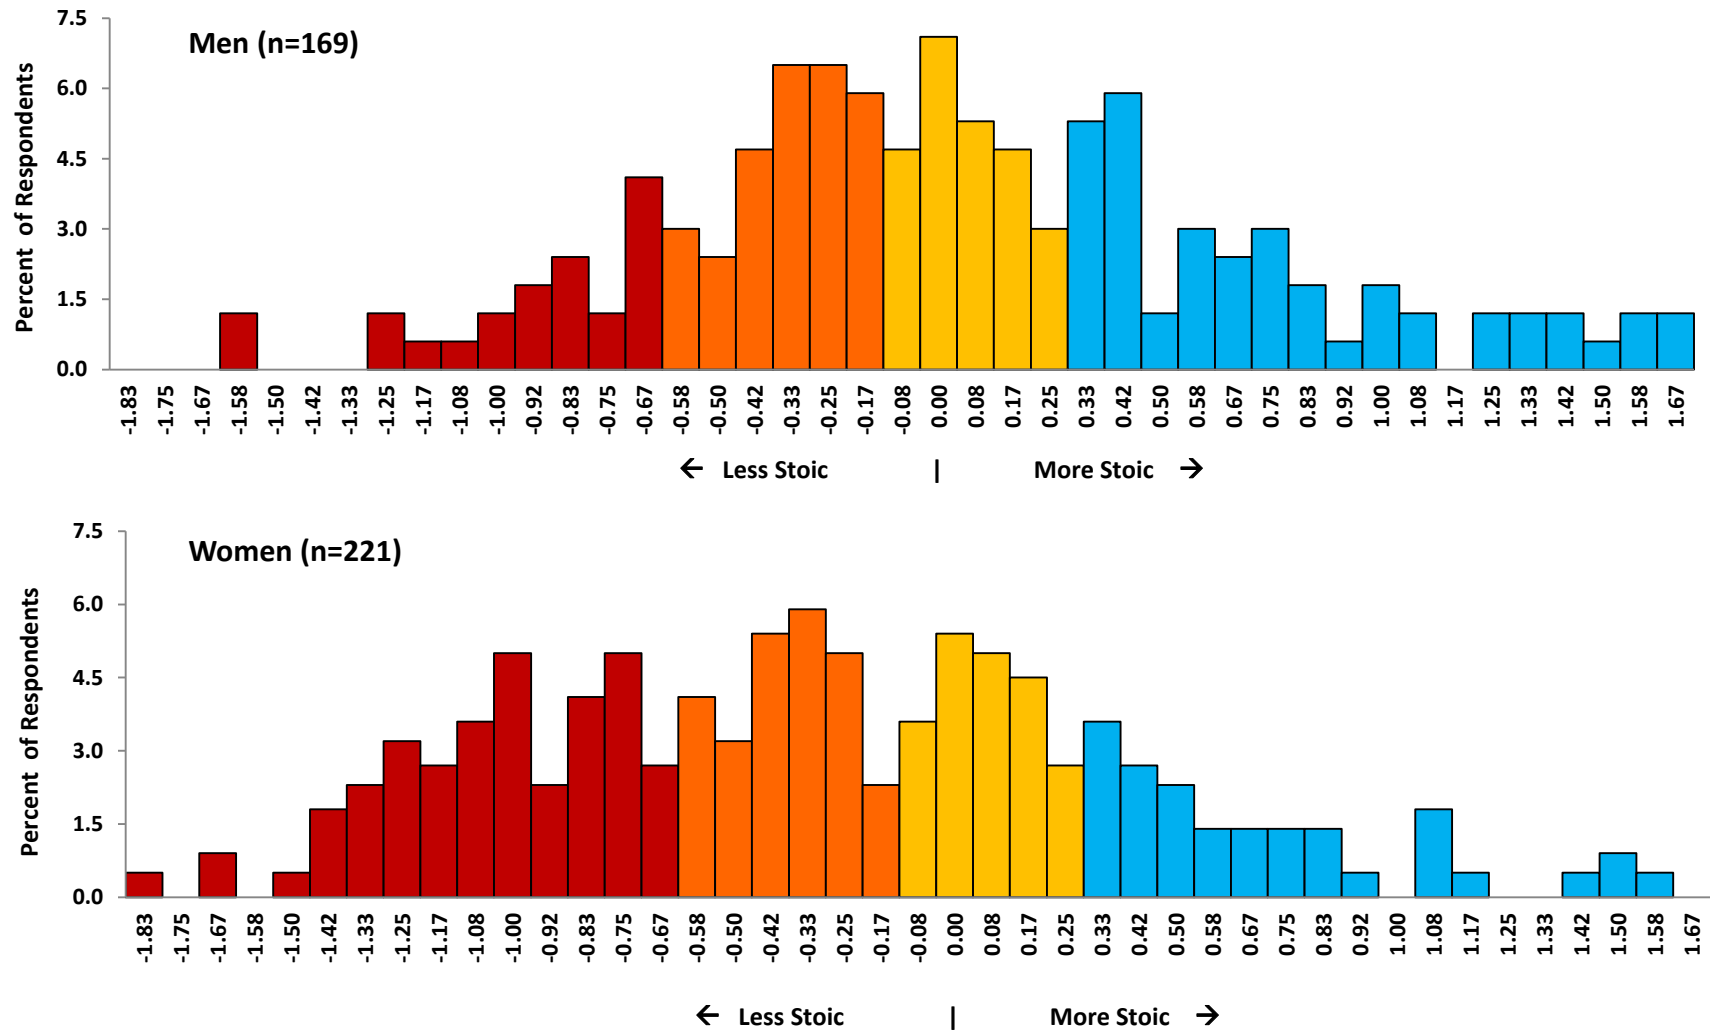

## Pathak Stoicism Paper

### Technical Supplement

Scale items under each of the 5 domains along with response frequencies for the preliminary 24-item PW-SIS are shown in Table S1. The results of the assessment of redundancy and content validity (Step 1) are shown in Table S2. We dropped 2 items (Q1 and Q4) because they were highly correlated with other items. The entire Stoic Composure domain, with 4 questions, was dropped after consideration of content validity. At every level of response to the statement “I try to be a stoic,” from “never” to all “all the time,” responses to the 4 Stoic Composure items were highly pro-stoic. Furthermore, the overall response distributions for 3 of the 4 items (Q10, Q21, and Q22) were highly skewed, with only 7%, 4%, and 3% disagreeing with these statements (Table S1). There were no other items in the scale that resulted in such highly skewed response distributions. We concluded that this domain was referencing a strongly sanctioned social norm, and that while the items were not explicitly worded as aphorisms, they might be functioning in the same way. Some respondents may have been inhibited to admit that they did not believe that they should stay cool in an emergency, if they perceived that a strong socio-cultural norm existed. Interestingly, the only reverse-coded item under this domain, Q16: “I believe it’s okay to let myself get upset and distracted in a major crisis,” elicited a less skewed response, although the majority of respondents still disagreed with this statement. Given that there was only a single item which performed marginally well, we decided to drop the entire domain.

Confirmatory factor analysis of the reduced 18-item, 4-domain PW-SIS resulted in strong factor loadings for 16 of the 18 items (Table S2), and decent model fit statistics (Table S3). Both items which were dropped (Q23 and Q6) were reverse-code items. Removal of these 2 items resulted in slightly improved model fit statistics (Table S3) when the CFA was re-run on the remaining 16 items.

As shown in Table S2, the 16-item scale retained 6 items for Stoic Taciturnity, 4 items for Stoic Endurance, 3 items for Stoic Serenity, and 3 items for Stoic Death Indifference. In the interest of parsimony, we decided to remove an additional 4 items, so that the final scale would retain 3 items for each of the 4 domains. We dropped 3 items from Stoic Taciturnity (Q7, Q9, and Q19), and 1 item from Stoic Endurance (Q11) - all with the lowest

1  
2  
3  
4  
5  
6  
7  
8  
9  
10  
11  
12  
13  
14  
15  
16  
17  
18  
19  
20  
21  
22  
23  
24  
25  
26  
27  
28  
29  
30  
31  
32  
33  
34  
35  
36  
37  
38  
39  
40  
41  
42  
43  
44  
45  
46  
47  
48  
49  
50  
51  
52  
53  
54  
55  
56  
57  
58  
59  
60

factor loadings, and all reverse-code items. Factor loadings for the remaining 12 items changed little in the final CFA model (Table S2), but model fit statistics improved so that the final RMSEA = 0.05 (95% CI 0.04-0.07), Goodness-of-Fit Index = 0.96, and Tucker-Lewis Index = 0.93.

For peer review only

1  
2  
3  
4  
5  
6  
7  
8  
9  
10  
11  
12  
13  
14  
15  
16  
17  
18  
19  
20  
21  
22  
23  
24  
25  
26  
27  
28  
29  
30  
31  
32  
33  
34  
35  
36  
37  
38  
39  
40  
41  
42  
43  
44  
45  
46  
47  
48  
49

| Original Item #                                                                                               | Core Meaning / Scale Items                                                                           | Disagree (-2) | Somewhat Disagree (-1) | Not sure (0) | Somewhat Agree (+1) | Agree (+2) |
|---------------------------------------------------------------------------------------------------------------|------------------------------------------------------------------------------------------------------|---------------|------------------------|--------------|---------------------|------------|
| <b>Stoic Taciturnity: The belief that one should conceal one's problems and emotions from others (Modern)</b> |                                                                                                      |               |                        |              |                     |            |
| Q1                                                                                                            | I prefer to keep my intense feelings to myself.                                                      | 10%           | 17%                    | 6%           | 40%                 | 27%        |
| Q3                                                                                                            | I don't believe in talking about my personal problems.                                               | 23%           | 31%                    | 14%          | 26%                 | 6%         |
| Q7                                                                                                            | I believe it's fine if I cry openly in front of other people. <i>(reverse)</i>                       | 31%           | 28%                    | 12%          | 18%                 | 11%        |
| Q9                                                                                                            | I believe in discussing my personal problems with family and friends. <i>(reverse)</i>               | 3%            | 12%                    | 14%          | 37%                 | 33%        |
| Q13                                                                                                           | I expect myself to hide my strong emotions from others.                                              | 13%           | 23%                    | 19%          | 32%                 | 13%        |
| Q15                                                                                                           | I expect myself to manage my own problems without help from anyone.                                  | 16%           | 24%                    | 13%          | 34%                 | 13%        |
| Q19                                                                                                           | If my emotions get very intense, I believe it's all right to just show them openly. <i>(reverse)</i> | 16%           | 25%                    | 23%          | 27%                 | 8%         |
| <b>Stoic Endurance: The belief that one should endure physical suffering without complaining (Modern)</b>     |                                                                                                      |               |                        |              |                     |            |
| Q2                                                                                                            | I expect myself to hide my aches and pains from others.                                              | 8%            | 24%                    | 12%          | 41%                 | 15%        |
| Q4                                                                                                            | I don't believe in bothering people close to me with my aches and pains.                             | 20%           | 27%                    | 14%          | 27%                 | 12%        |
| Q5                                                                                                            | I expect myself to manage my physical discomfort without complaining.                                | 9%            | 18%                    | 14%          | 44%                 | 16%        |
| Q11                                                                                                           | If I am suffering, I believe in telling someone about my physical pain. <i>(reverse)</i>             | 5%            | 9%                     | 16%          | 37%                 | 33%        |
| Q17                                                                                                           | I believe my physical pain is best handled by just keeping quiet about it.                           | 29%           | 29%                    | 22%          | 15%                 | 5%         |
| Q23                                                                                                           | I believe in letting myself complain about everyday aches and pains. <i>(reverse)</i>                | 39%           | 32%                    | 16%          | 11%                 | 3%         |
| <b>Stoic Composure: The belief that one should control one's emotions and behavior under stress (Modern)</b>  |                                                                                                      |               |                        |              |                     |            |
| Q10                                                                                                           | I expect myself to remain calm and decisive in an emergency.                                         | 2%            | 5%                     | 11%          | 29%                 | 54%        |
| Q16                                                                                                           | I believe it's okay to let myself get upset and distracted in a major crisis. <i>(reverse)</i>       | 29%           | 25%                    | 19%          | 19%                 | 7%         |
| Q21                                                                                                           | I believe I should be calm and level-headed.                                                         | 2%            | 2%                     | 5%           | 35%                 | 56%        |
| Q22                                                                                                           | I believe I should stay cool and steady when the pressure is high and the situation is tense.        | 1%            | 2%                     | 8%           | 36%                 | 54%        |
| <b>Stoic Serenity: The belief that one should refrain from experiencing strong emotions (Classical)</b>       |                                                                                                      |               |                        |              |                     |            |
| Q8                                                                                                            | I believe I should experience strong emotions. <i>(reverse)</i>                                      | 4%            | 8%                     | 21%          | 33%                 | 34%        |
| Q14                                                                                                           | I would prefer to be unemotional.                                                                    | 37%           | 20%                    | 17%          | 14%                 | 11%        |
| Q20                                                                                                           | I expect myself to avoid feeling intense emotions.                                                   | 25%           | 31%                    | 19%          | 19%                 | 5%         |
| <b>Stoic Death Indifference: The belief that one should not fear or avoid death (Classical)</b>               |                                                                                                      |               |                        |              |                     |            |
| Q6                                                                                                            | I believe it's okay if I worry about dying too soon. <i>(reverse)</i>                                | 25%           | 16%                    | 24%          | 19%                 | 17%        |
| Q12                                                                                                           | When the time for my death comes, I believe I should accept it without fear.                         | 8%            | 12%                    | 20%          | 21%                 | 39%        |
| Q18                                                                                                           | I would be very upset if I knew my death was coming soon. <i>(reverse)</i>                           | 13%           | 6%                     | 22%          | 21%                 | 39%        |
| Q24                                                                                                           | I would not allow myself to be bothered by the fear of death.                                        | 14%           | 19%                    | 26%          | 17%                 | 24%        |

Table S2. **Confirmatory Factor Analysis and Item Reduction** (n=390)

| Item | Core Meaning / Scale Items                                                                           | Step 1:<br>Assessment of Redundancy<br>and Content Validity | Step 2:<br>CFA of 4-Domain,<br>18-Item Scale | Step 3:<br>CFA of 4-Domain,<br>16-Item Scale | Step 4:<br>CFA of 4-Domain,<br>12-Item Final Scale |
|------|------------------------------------------------------------------------------------------------------|-------------------------------------------------------------|----------------------------------------------|----------------------------------------------|----------------------------------------------------|
|      | <b>Stoic Taciturnity</b>                                                                             |                                                             | factor loadings                              | factor loadings                              | factor loadings                                    |
| Q1   | I prefer to keep my intense feelings to myself.                                                      | Redundant to Q13 (r = 0.54)                                 |                                              |                                              |                                                    |
| Q3   | I don't believe in talking about my personal problems.                                               |                                                             | 0.66                                         | 0.67                                         | 0.67                                               |
| Q7   | I believe it's fine if I cry openly in front of other people. <i>(reverse)</i>                       |                                                             | 0.46                                         | 0.46 <sup>a</sup>                            |                                                    |
| Q9   | I believe in discussing my personal problems with family and friends. <i>(reverse)</i>               |                                                             | 0.55                                         | 0.55 <sup>a</sup>                            |                                                    |
| Q13  | I expect myself to hide my strong emotions from others.                                              |                                                             | 0.75                                         | 0.75                                         | 0.73                                               |
| Q15  | I expect myself to manage my own problems without help from anyone.                                  |                                                             | 0.61                                         | 0.61                                         | 0.62                                               |
| Q19  | If my emotions get very intense, I believe it's all right to just show them openly. <i>(reverse)</i> |                                                             | 0.49                                         | 0.48 <sup>a</sup>                            |                                                    |
|      | <b>Stoic Endurance</b>                                                                               |                                                             |                                              |                                              |                                                    |
| Q2   | I expect myself to hide my aches and pains from others.                                              |                                                             | 0.65                                         | 0.65                                         | 0.68                                               |
| Q4   | I don't believe in bothering people close to me with my aches and pains.                             | Redundant to Q3 (r = 0.57)                                  |                                              |                                              |                                                    |
| Q5   | I expect myself to manage my physical discomfort without complaining.                                |                                                             | 0.57                                         | 0.56                                         | 0.55                                               |
| Q11  | If I am suffering, I believe in telling someone about my physical pain. <i>(reverse)</i>             |                                                             | 0.54                                         | 0.55 <sup>a</sup>                            |                                                    |
| Q17  | I believe my physical pain is best handled by just keeping quiet about it.                           |                                                             | 0.62                                         | 0.62                                         | 0.61                                               |
| Q23  | I believe in letting myself complain about everyday aches and pains. <i>(reverse)</i>                |                                                             | 0.26 <sup>b</sup>                            |                                              |                                                    |
|      | <b>Stoic Composure</b>                                                                               |                                                             |                                              |                                              |                                                    |
| Q10  | I expect myself to remain calm and decisive in an emergency.                                         | Domain excluded <sup>c</sup>                                |                                              |                                              |                                                    |
| Q16  | I believe it's okay to let myself get upset and distracted in a major crisis. <i>(reverse)</i>       | Domain excluded <sup>c</sup>                                |                                              |                                              |                                                    |
| Q21  | I believe I should be calm and level-headed.                                                         | Domain excluded <sup>c</sup>                                |                                              |                                              |                                                    |
| Q22  | I believe I should stay cool and steady when the pressure is high and the situation is tense.        | Domain excluded <sup>c</sup>                                |                                              |                                              |                                                    |
|      | <b>Stoic Serenity</b>                                                                                |                                                             |                                              |                                              |                                                    |
| Q8   | I believe I should experience strong emotions. <i>(reverse)</i>                                      |                                                             | 0.51                                         | 0.51                                         | 0.48                                               |
| Q14  | I would prefer to be unemotional.                                                                    |                                                             | 0.70                                         | 0.70                                         | 0.71                                               |
| Q20  | I expect myself to avoid feeling intense emotions.                                                   |                                                             | 0.62                                         | 0.62                                         | 0.63                                               |
|      | <b>Stoic Death Indifference</b>                                                                      |                                                             |                                              |                                              |                                                    |
| Q6   | I believe it's okay if I worry about dying too soon. <i>(reverse)</i>                                |                                                             | 0.27 <sup>b</sup>                            |                                              |                                                    |
| Q12  | When the time for my death comes, I believe I should accept it without fear.                         |                                                             | 0.61                                         | 0.62                                         | 0.63                                               |
| Q18  | I would be very upset if I knew my death was coming soon. <i>(reverse)</i>                           |                                                             | 0.57                                         | 0.57                                         | 0.57                                               |
| Q24  | I would not allow myself to be bothered by the fear of death.                                        |                                                             | 0.78                                         | 0.76                                         | 0.76                                               |

Footnotes: <sup>a</sup> = Excluded for parsimony; <sup>b</sup> = Excluded for poor factor loading; <sup>c</sup> = Excluded for poor content validity and highly skewed response distribution.

Table S3. Model Fit Statistics for Confirmatory Factor Analysis of the PW-SIS

| Model        | Description                                                                                                                                                                                                                                                                                          | Chi square      | df  | RMSEA (90% CI)         | Goodness-of-fit Index (GFI) | Adjusted GFI | Tucker-Lewis Index |
|--------------|------------------------------------------------------------------------------------------------------------------------------------------------------------------------------------------------------------------------------------------------------------------------------------------------------|-----------------|-----|------------------------|-----------------------------|--------------|--------------------|
|              | <b>Step 2:</b> After exclusion of 2 redundant items (q1 and q4) and 4 items from the Stoic Composure domain (q10, q16, q21, q22), confirmatory factor analysis (CFA) was performed on the 4-domain, 18-item PW-SIS.                                                                                  | 318<br>p <.0001 | 129 | 0.06<br>(0.05 to 0.07) | 0.91                        | 0.89         | 0.86               |
|              | <b>Step 3:</b> After exclusion of 2 items with poor factor loading (q6 and q23), CFA was performed on the 4-domain, 16-item PW-SIS.                                                                                                                                                                  | 264<br>p <.0001 | 98  | 0.07<br>(0.06 to 0.08) | 0.92                        | 0.89         | 0.89               |
| <b>Final</b> | <b>Step 4:</b> Factor loadings from Step 3 were examined, and for the purpose of parsimony, 4 additional items were excluded (q7, q9, q11, q19). Items with the strongest factor loadings in each domain were retained. The resulting 4-domain, 12-item PW-SIS has 3 items in each of the 4 domains. | 103<br>p <.0001 | 48  | 0.05<br>(0.04 to 0.07) | 0.96                        | 0.93         | 0.93               |

# BMJ Open

## Stoic Beliefs and Health: Development and Preliminary Validation of the Pathak-Wieten Stoicism Ideology Scale

|                                 |                                                                                                                                                                                                                                                                                        |
|---------------------------------|----------------------------------------------------------------------------------------------------------------------------------------------------------------------------------------------------------------------------------------------------------------------------------------|
| Journal:                        | <i>BMJ Open</i>                                                                                                                                                                                                                                                                        |
| Manuscript ID                   | bmjopen-2016-015137.R1                                                                                                                                                                                                                                                                 |
| Article Type:                   | Research                                                                                                                                                                                                                                                                               |
| Date Submitted by the Author:   | 04-Jul-2017                                                                                                                                                                                                                                                                            |
| Complete List of Authors:       | Pathak, Elizabeth; University of South Florida, Morsani College of Medicine<br>Wieten, Sarah; University of South Florida, Department of Philosophy and Morsani College of Medicine<br>Wheldon, Christopher W.; University of South Florida, Department of Community and Family Health |
| <b>Primary Subject Heading</b>: | Patient-centred medicine                                                                                                                                                                                                                                                               |
| Secondary Subject Heading:      | Epidemiology, Health services research, Research methods, Public health                                                                                                                                                                                                                |
| Keywords:                       | stoicism, help-seeking, health behavior theories, masculinity, patient perspectives, gender                                                                                                                                                                                            |
|                                 |                                                                                                                                                                                                                                                                                        |

SCHOLARONE™  
Manuscripts

Peer Review Only

1  
2  
3  
4  
5  
6  
7  
8  
9  
10  
11  
12  
13  
14  
15  
16  
17  
18  
19  
20  
21  
22  
23  
24  
25  
26  
27  
28  
29  
30  
31  
32  
33  
34  
35  
36  
37  
38  
39  
40  
41  
42  
43  
44  
45  
46  
47  
48  
49  
50  
51  
52  
53  
54  
55  
56  
57  
58  
59  
60

## Stoic Beliefs and Health: Development and Preliminary Validation of the Pathak-Wieten Stoicism Ideology Scale

**Elizabeth Barnett Pathak, PhD, MSPH, FAHA**

Department of Internal Medicine  
Morsani College of Medicine, University of South Florida

**Sarah Wieten, MA**

Department of Philosophy  
Department of Internal Medicine  
Morsani College of Medicine, University of South Florida

**Christopher Wheldon, PhD**

Department of Community and Family Health  
College of Public Health, University of South Florida

**Acknowledgements:** The authors are grateful to the respondents for their voluntary participation in this study.

**Contributors:** EBP conceived the study. EBP and SW developed the preliminary PW-SIS. All authors enrolled participants and collected questionnaire data. CW contributed statistical expertise to the confirmatory factor analysis. EBP analyzed the data. All authors interpreted the results and outlined the paper. EBP drafted the manuscript. All authors contributed to literature review and substantive revisions to the paper.

**Funding:** This study was unfunded.

**Competing Interests:** The authors have no competing interests.

**Data Sharing:** No additional data available.

**Corresponding Author:** Dr. Elizabeth Pathak ([dr.elizabeth.pathak@gmail.com](mailto:dr.elizabeth.pathak@gmail.com), 1-813-610-8715)



**ABSTRACT**

**Introduction:** We developed and validated a new parsimonious scale to measure stoic beliefs. Key domains of stoicism are imperviousness to strong emotions, indifference to death, taciturnity, and self-sufficiency. In the context of illness and disease, a personal ideology of stoicism may create an internal resistance to objective needs, which can lead to negative consequences. Stoicism has been linked to help-seeking delays, inadequate pain treatment, caregiver strain, and suicide after economic stress.

**Methods:** During 2013-2014, 390 adults aged 18+ years completed a brief anonymous paper questionnaire containing the preliminary 24-item Pathak-Wieten Stoicism Ideology Scale (PW-SIS). Confirmatory factor analysis (CFA) was used to test an *a priori* multi-domain theoretical model. Content validity and response distributions were examined. Socio-demographic predictors of strong endorsement of stoicism were explored with logistic regression.

**Results:** The final PW-SIS contains 4 conceptual domains and 12 items. CFA showed very good model fit: RMSEA = 0.05 (95% CI 0.04-0.07), Goodness-of-Fit Index = 0.96 and Tucker-Lewis Index = 0.93. Cronbach's alpha was 0.78 and ranged from 0.64 to 0.71 for the sub-scales. Content validity analysis showed a statistically significant trend, with respondents who reported trying to be a stoic "all of the time" having the highest PW-SIS scores. Men were over two times as likely as women to fall into the top quartile of responses (OR=2.30, 95% CI 1.44 to 3.68,  $p<0.001$ ). Odds ratios showing stronger endorsement of stoicism by Hispanics, Blacks, and Biracial persons were not statistically significant.

**Discussion:** The PW-SIS is a valid and theoretically coherent scale which is brief and practical for integration into a wide range of health behavior and outcomes research studies.

## Strengths and Limitations

- The Pathak-Wieten Stoicism Ideology Scale (PW-SIS) is a new, theoretically coherent, multi-dimensional scale which measures stoic beliefs and sense of self along 4 domains: Stoic Taciturnity, Stoic Endurance, Stoic Serenity, and Stoic Death Indifference.
- The PW-SIS contains 12 items and demonstrates good psychometric properties and content validity in a large sample (n=390) of educated adults.
- Mean stoicism ideology scores were higher for men than women, but for both genders the most frequent scores were neutral on stoic ideology, and the response distributions by gender overlapped almost completely.
- Further validation of the PW-SIS in demographically and socioeconomically diverse populations will improve its generalizability.

## INTRODUCTION

Stoicism is a school of philosophy which originated in ancient Greece.<sup>1-3</sup> Core elements in the classical definition of stoicism were an idealization of imperviousness to strong emotions, and an indifference to death.<sup>3</sup> Major Asian philosophical systems of thought, such as Buddhism and Confucianism, also endorsed stoic principles and teachings.<sup>4,5</sup> Beginning in the 19<sup>th</sup> century, academic and popular philosophers in Europe and the Americas were exposed to and influenced by Asian philosophy and religion. Therefore, it may not always be possible to distinguish whether particular strands of contemporary thought associated with stoicism originated in ancient Greece, ancient India, or elsewhere. For example, using very different language and symbolism, both the Greek Stoics and the Buddha exhorted the student to live fully and completely in the present, while minimizing concern about the future.

Contemporary meanings and connotations of stoicism have expanded beyond their ancient origins, to include ideals of taciturnity and self-sufficiency.<sup>6-8</sup> Today, personal ideologies, values and behaviors which fall under the umbrella of stoicism are commonplace across many industrial nations, and are evident in many non-Western cultures as well.<sup>9-12</sup> In the USA, the armed forces have explicitly embraced stoic ideology as a tool for mitigating combat stress.<sup>13,14</sup>

### Previous Research on Stoicism and Health

Much of the previous health-related research which mentions stoicism has invoked the term as a descriptor of particular patient groups or behaviors, without an explicit theoretical context.<sup>8</sup> Stoicism is mentioned most frequently in studies related to pain (particularly cancer pain) and coping strategies; indeed stoicism has been labeled a “coping strategy” in more than one study.<sup>6-8,15,16</sup> Stoicism has also been invoked as a defining characteristic of masculinity and as a key explanatory factor for certain health behaviors and outcomes among men. There are several psychometric instruments that measure endorsement or adherence to social norms of masculinity, but these scales include only a few items which explicitly assess stoicism.<sup>17-19</sup>

Direct measurement of stoicism in previous health-related scales has implicitly defined stoicism as a pattern of behaviors, not as an ideology. The pain attitudes questionnaire (PAQ), published in 2001, has a brief

subset of questions focused on stoic responses to physical pain.<sup>20-22</sup> The stoicism items in this scale were designed to capture pain coping strategies of chronically ill or injured patients. Of the 29 items in the PAQ, most measured past actions (i.e. pattern of behavior) and only 2 were explicitly focused on ideology: #2 “When I am in pain I should keep it to myself,” and #24 “Pain is something that should be ignored.” The 20-item Liverpool Stoicism Scale (LSS) (Table 1) was first published in 1995<sup>23</sup> and has not been widely used.<sup>24-27</sup> The majority of items in the LSS focus on behavior or conduct, e.g. “I tend not to express my emotions.” However, there are 3 items that are ideological, e.g. “One should keep a ‘stiff upper lip’.” Both the LSS and the PAQ contain statements that are aphorisms (i.e. “Pain is something that should be ignored”) or proverbs (i.e. “A problem shared is a problem halved”). We consider these formats problematic, because these statements do not refer explicitly to the respondent. Consequently agreement cannot be interpreted as a reflection of self-identity. Furthermore, aphorisms and proverbs may invite endorsement to a great extent simply because of familiarity. In fact, Yong et al found that item #24 “Pain is something that should be ignored” on the PAQ had a low alpha and reduced the internal consistency of their scale.<sup>21</sup>

### Theoretical Context

In 1983, Kathy Charmaz published a very influential sociological study on the “loss of self” suffered by people with chronic illnesses.<sup>28</sup> Although stoicism *per se* was mentioned only briefly, the idea that the suffering caused by disease emerges as much (or more) from threats to a person’s identity and sense of self as from purely bodily experiences of pathophysiology is one of the theoretical underpinnings of our work.

In this report, we attempt to articulate an explicit theory of stoicism and its potential impact on health. We take the standpoint that stoicism is a system for self-regulation rather than a behavior or personality trait. As a guide to ideal self-conduct, it requires self-conscious implementation and regular enforcement; in other words, stoicism is an ideology (e.g. a belief system which informs one’s attitudes and actions with the inherent potential for internal resistance and conflict). Personal ideologies create expectations for people about who they are, what they should do, and what they should not do. Specifically, we theorize that people who strongly endorse a **personal ideology of stoicism** will be more likely to avoid or delay seeking professional medical intervention for

1 serious signs and symptoms of disease. This personal ideology of self will not mandate behavior in a deterministic  
2 fashion; rather, stoicism will create expectations of ideal behavior (which may not always be met).  
3  
4

5  
6 The purpose of our study was to develop a theoretically coherent multi-dimensional scale to assess  
7 endorsement of a personal ideology of stoicism, and to empirically validate this scale in a multiethnic sample of  
8 healthy community-dwelling adults. We present the results of confirmatory factor analysis of the multi-domain  
9 Pathak-Wieten Stoicism Ideology Scale (PW-SIS), and discuss the potential usefulness of this tool for predicting  
10 constraints in health-related help-seeking behaviors. The PW-SIS is a generalized scale which assesses stoic beliefs  
11 and sense of self but does not explicitly measure health behaviors or health outcomes. Therefore the PW-SIS can  
12 be used in a wide range of empirical research studies.  
13  
14  
15  
16  
17  
18  
19  
20  
21  
22  
23

## 24 METHODS

### 25 Conceptual Development of the Stoicism Ideology Scale

26 Drawing on multiple scholarly and popular sources,<sup>1-3,6,15,29-31</sup> we developed the preliminary 24-item  
27 Stoicism Ideology Scale (PW-SIS) to capture endorsement of 5 dimensions of stoicism (see Table S1 in the  
28 Technical Supplement, available online). Based on our literature review and expert (SW) knowledge of philosophy,  
29 we defined each domain as follows:  
30  
31  
32  
33  
34  
35  
36  
37

38 *Stoic Taciturnity* is the belief that one should conceal one's problems and emotions from others.

39 *Stoic Endurance* is the belief that one should endure physical suffering without complaining.

40 *Stoic Composure* is the belief that one should control one's emotions and behavior under stress.

41 *Stoic Serenity* is the belief that one should refrain from experiencing strong emotions.

42 *Stoic Death Indifference* is the belief that one should not fear or avoid death.  
43  
44  
45

46 Each item in our scale was carefully worded to capture the respondents' ideology, not their past behavior, using a  
47 5-point Likert response scale with the following responses: "disagree," "somewhat disagree," "not sure,"  
48 "somewhat agree," and "agree." Nine of the original 24 items were "reverse" items that specified anti-stoic  
49 beliefs, i.e. "I believe I should experience strong emotions." The participant version of the scale (pen and paper  
50 questionnaire) listed response codes of 0 (disagree) through 4 (agree). These responses were re-coded during  
51 analysis to range from -2 (disagree) to +2 (agree). Consequently an average score of 0 corresponds to a neutral  
52  
53  
54  
55  
56  
57  
58  
59  
60

1  
2 stance – neither endorsement nor rejection of stoicism. Positive scores indicate endorsement of a stoic ideology,  
3  
4 while negative scores indicate rejection of a stoic ideology.  
5

### 6 Data Collection

7  
8 This study was approved by the Institutional Review Board (IRB) of the University of South Florida. Data  
9  
10 were collected over a period of 10 months during 2013-2014. All participants were university employees or  
11  
12 students. Written consent forms were waived by the IRB to ensure respondent anonymity but all participants  
13  
14 provided verbal informed consent. Each participant completed a brief paper-and-pencil questionnaire consisting  
15  
16 of the 24-item preliminary PW-SIS, socio-demographic questions, and a final single item “I try to be a stoic” with a  
17  
18 7-item response scale ranging from “never” to “all the time.” The study population consisted of a convenience  
19  
20 sample of 390 adults aged 18 years and older who were recruited in person by the authors in public common  
21  
22 areas of university facilities (e.g. cafeterias), using walk-up tables. Monetary incentives were not provided to  
23  
24 participants. A study response rate could not be calculated due to the data collection methods.  
25  
26  
27  
28

### 29 Data Analyses

30  
31 Data analysis proceeded in 5 steps. During Step 1, we examined univariate response distributions for each  
32  
33 of the 24 scale items. A simple correlation matrix was examined to identify redundant items. Finally, we assessed  
34  
35 content validity based on agreement with the statement “I try to be a stoic.” As a result of Step 1 analyses, 6  
36  
37 items were dropped from further analyses - including the entire Stoic Composure domain. Further details of this  
38  
39 scale reduction step are included in the Technical Supplement, including Table S2.  
40  
41  
42

43 During Step 2, we conducted a confirmatory factor analysis (CFA) of the reduced 18-item PW-SIS. CFA is  
44  
45 the appropriate analytic choice to test scales that have an *a priori*, theoretically explicit sub-domain structure.<sup>32-36</sup>  
46  
47 We used *proc calis* in SAS 9.4 for the CFA. Based on the results of the first CFA, we eliminated 2 items with poor  
48  
49 factor loadings (see Technical Supplement for details).  
50  
51

52 During Step 3, we repeated the CFA on the reduced 16-item PW-SIS. Finally, for the purpose of parsimony  
53  
54 we further reduced the total number of scale items to 12 (3 items in each of 4 domains) and conducted a CFA on  
55  
56  
57  
58  
59  
60

1  
2 the final 12-item version of the PW-SIS (Step 4; see Table S3). Additional details and rationale for analytic Steps 1-  
3  
4 4, including data tables S1-S3, are provided in the Technical Supplement, available online.

5  
6 Step 5 of our analysis consisted of preliminary content validation, examination of response distributions  
7  
8 for the overall and domain scores, and exploratory logistic regression modeling of socio-demographic predictors  
9  
10 of strong endorsement of stoicism. For the logistic regression analysis, we categorized the outcome using the top  
11  
12 quartile of the overall distribution of responses to represent strong endorsement of stoicism.  
13  
14

## 15 16 17 18 **RESULTS**

19  
20 The size of our study population (n=390) provided more than 15 respondents for each question in the  
21  
22 preliminary scale, which exceeds the widely accepted norm of at least 10 respondents per question.<sup>37</sup> Although  
23  
24 skewed toward younger adults (78% of respondents were < 25 years old), the study population was in other  
25  
26 respects diverse (Table 1). A majority self-identified as female (57%) and white (55%). Hispanics (15%) and Blacks  
27  
28 (14%) were the second and third largest racial/ethnic groups, followed by Asians (9%) and biracial or other  
29  
30 ethnicity (6%). A substantial minority of respondents (19%) were born outside the U.S or Puerto Rico.  
31  
32

33  
34 The final 4-domain, 12-item Pathak-Wieten Stoicism Ideology Scale is shown in Table 2. Confirmatory  
35  
36 factor analysis of the final scale showed very good model fit with individual item factor loadings ranging from 0.48  
37  
38 to 0.76, RMSEA = 0.05 (95% CI 0.04-0.07), Goodness-of-Fit Index = 0.96 and Tucker-Lewis Index = 0.93.  
39  
40

41 Relationships among the PW-SIS and its four conceptual domains are shown in Table 3. Cronbach's alpha  
42  
43 ranged from 0.64 to 0.71 for the sub-scales and was 0.78 for the 12-item PW-SIS. Scores for Stoic Taciturnity were  
44  
45 strongly correlated with scores for both Stoic Endurance and Stoic Serenity, but Stoic Endurance and Stoic  
46  
47 Serenity were not highly correlated with each other. Stoic Death Indifference had the highest (most stoic) mean  
48  
49 scores among the four domains, and it was least correlated with the other three domains.  
50  
51

52 Figure 1 depicts mean PW-SIS scores by response to the statement "I try to be a stoic." There was a clear  
53  
54 monotonic and statistically significant trend, with respondents who reported trying to be a stoic "all of the time"  
55  
56 having the highest stoicism scores, and respondents who reported trying to be a stoic "never" having the lowest  
57  
58  
59  
60

1  
2 stoicism scores. Most respondents chose one of the 3 intermediate categories. Respondents who chose “I don’t  
3  
4 know” as their response had stoicism scores similar to those who said they “sometimes” tried to be a stoic.  
5

6 The distributions of mean scores for the 4 conceptual domain sub-scales are shown in Figure 2. Domain  
7  
8 scores are comprised of the mean score for the 3 questions in the domain. In this study population, respondents  
9  
10 were least likely to endorse Stoic Serenity and most likely to endorse Stoic Death Indifference.  
11

12 The full distribution of respondent scores is shown separately for women and men in Figure 3. The  
13  
14 distributions overlapped almost completely, but there were no men with the least stoic scores, and no women  
15  
16 with the most stoic scores. Response distributions were skewed to the left for women (less stoic) and to the right  
17  
18 for men (more stoic), consistent with a statistically significant difference in the mean scores for women (-  
19  
20 0.31, 95% CI -0.40 to -0.22) and men (+0.04, 95% CI -0.05 to +0.14).  
21  
22  
23

24 Results of an exploratory analysis of sociodemographic predictors of high endorsement of stoicism are  
25  
26 shown in Table 4. There is no *a priori* cut point designated as “highly stoic” in the PW-SIS; in this analysis the cut  
27  
28 point used was a mean score greater than the 75<sup>th</sup> percentile of the overall response distribution. Men were over  
29  
30 two times as likely as women to fall into the top quartile of responses (OR=2.30, 95% CI 1.44 to 3.68, p<0.001).  
31  
32 Adults born in the USA or Puerto Rico were also twice as likely as adults born elsewhere to strongly endorse  
33  
34 stoicism (OR=1.97, 95% CI 1.01 to 3.84, p=0.048). Odds ratios showing stronger endorsement of stoicism by  
35  
36 Hispanics, Blacks, and Biracial persons were not statistically significant.  
37  
38  
39  
40  
41  
42

## 43 DISCUSSION

44 The Pathak-Wieten Stoicism Ideology Scale is a theoretically coherent, multi-dimensional scale which  
45  
46 demonstrates good psychometric properties and content validity based on initial validation in a large sample of  
47  
48 educated adults. The PW-SIS is also brief and practical for integration into a wide range of empirical research  
49  
50 studies. In our study population of mostly younger adults, endorsement of stoicism varied by conceptual domain,  
51  
52 with the weakest endorsement of the classical domain Stoic Serenity (aversion to strong emotions). Exploratory  
53  
54 logistic regression analysis identified male gender and USA birth as significant predictors of strong endorsement of  
55  
56  
57  
58  
59  
60



1  
2 stoicism. Finally, point estimates suggested higher endorsement of stoicism for Blacks, Hispanics, and Biracial  
3  
4 persons compared with Whites, but these results were not statistically significant.  
5

6  
7 Integration of our theory of a stoic ideology of the self into existing health behavior models could help  
8  
9 explain the formation of beliefs and attitudes toward criterion-specific help-seeking behaviors. Reasoned action  
10  
11 approaches - such as the Integrative Model of Behavior Prediction - poorly define background factors that  
12  
13 underlie belief formation.<sup>38</sup> Measurement of self-concepts, such as stoicism ideologies, may help explain this  
14  
15 population variability. Expanding health behavior theory to include aspects of the self could also help inform  
16  
17 health education messaging and risk-based communication.  
18  
19

20  
21 Ironically, a personal ideology of stoicism almost guarantees failure to live up to one's personal ideal.  
22  
23 Experiences of illness and disease often involve transient weakness and functional limitations. With aging, these  
24  
25 experiences will increase in frequency, duration, and severity for most people. Simply put, experiences of illness  
26  
27 and disease tend to require aid – whether from health professionals in a formal context, or from family members  
28  
29 or friends in an informal context. An ideology of stoicism creates an internal resistance to external objective  
30  
31 needs, which can lead to negative consequences.<sup>8-12</sup>  
32  
33

### 34 **Gender and Stoicism**

35  
36 Stoicism is widely viewed as a defining attribute of masculinity. Instruments designed to assess  
37  
38 endorsement of hegemonic masculine ideologies have included specific questions that touch on stoicism.  
39  
40 However, the conceptual and measurement overlap between these instruments and the 4-domain PW-SIS is  
41  
42 minor.<sup>17</sup> For example, in the widely used Personal Attributes Questionnaire, only 2 of 24 items relate to a single  
43  
44 domain of the PW-SIS. The Conformance to Masculine Norms scale assesses 11 distinct domains of masculinity, of  
45  
46 which only 2 (emotional control and self-reliance) partially overlap with domains of the PW-SIS.<sup>18,19</sup> In our study,  
47  
48 the results are notable because for both genders the most frequent scores were in the middle of the distribution  
49  
50 (neutral on stoic ideology), and the response distributions for women and men overlapped almost completely.  
51  
52 Despite the fact that men were twice as likely as women to strongly endorse stoic ideology, our results suggest  
53  
54 that gendered stereotypes about stoicism (“stoic men” and “emotional women”) are overblown. Because the PW-  
55  
56  
57  
58  
59  
60

1  
2 SIS is agnostic to respondents' genders, it is ideally suited to investigate the empirical reality of stoicism among  
3  
4 both women and men. Furthermore, our finding that a minority of women strongly endorsed stoic ideology may  
5  
6 be particularly important. For example, a study of major strain among family caretakers of elderly dementia  
7  
8 patients found that those who used stoicism as a coping strategy suffered burnout, while those who sought social  
9  
10 support did not.<sup>39</sup>

### 11 12 **Study Limitations**

13  
14 In any questionnaire-based scale, validity of the individual items and the total scale against the concept of  
15  
16 interest is of paramount concern. Unlike many psychometric instruments, the PW-SIS does not purport to  
17  
18 measure a latent, inherent trait such as personality, or a clinically-definable disorder such as depression or  
19  
20 anxiety. Rather, we attempt to measure an explicit set of beliefs, which by definition are neither inborn nor  
21  
22 immutable. Therefore, a robust assessment of the content validity of our scale items must come after publication  
23  
24 and evaluation by multiple experts and researchers. We included a single questionnaire item "I try to be a stoic"  
25  
26 to assess content validity, but future validation and outcome studies could expand on this approach or include a  
27  
28 qualitative component.

29  
30 A related question pertains to the predictive validity of the PW-SIS. In other words, to what extent does  
31  
32 strong endorsement of stoic ideology predict actual stoic behaviors? Predictive validity can only be rigorously  
33  
34 addressed through prospective study designs.

35  
36 Our study population, similar to many scale validation studies, was university-based. Therefore validity  
37  
38 and generalizability to very different populations should not be assumed, but instead tested in future studies. In  
39  
40 particular, validation of the PW-SIS among the elderly and persons of lower educational attainment would be  
41  
42 valuable for health-related research.

### 43 44 **Strengths of the PW-SIS**

45  
46 Our scale has several strengths. First, all items refer explicitly to the respondent; there are no aphorisms  
47  
48 or proverbs. Second, each item refers to an expectation or belief about ideal self-conduct, rather than to a simple  
49  
50 description of past behavior. So for example, Q5 states "I expect myself to manage my physical discomfort  
51  
52  
53  
54  
55  
56  
57  
58  
59  
60

1 without complaining” rather than “I always manage my physical discomfort without complaining.” This distinction  
2 is critical to the theoretical underpinnings of the scale. Thirdly, we deliberately chose not to mention disease or  
3 illness in the scale items, so that the scale would be appropriate for a wide range of study populations, including  
4 currently healthy individuals. (Although some items do explicitly mention “physical pain” and “everyday aches and  
5 pains.”) Our intention was to capture the respondents’ *global* endorsement of stoicism as a *code of ideal conduct*.  
6  
7  
8  
9  
10  
11  
12  
13 Finally, the PW-SIS does not reference gender norms, so it can serve as a tool to empirically investigate gender  
14 differences in stoic ideology.  
15

### 16 **Directions for future research**

17  
18  
19  
20 The PW-SIS should be validated in multiple study populations with a range of socioeconomic and  
21 demographic characteristics. Our theory that ideologies of stoicism will result in constraints on health-related  
22 behaviors needs to be empirically tested, ideally in rigorously designed prospective studies. Given the rise of  
23 patient-centered health care,<sup>40,41</sup> understanding patients’ motivations and perspectives has never been more  
24 important. The current health education paradigm holds that improving patients’ knowledge of symptoms and  
25 signs will result in more timely help-seeking behavior.<sup>38,42-44</sup> Each year thousands of individuals suffer needlessly  
26 and many die because of extended delays in seeking professional aid for acute medical conditions (e.g.,  
27 myocardial infarctions, strokes, diabetic emergencies, cancer complications and pain, and acute exacerbations of  
28 congestive heart failure).<sup>45-52</sup> Numerous studies have been conducted to attempt to elucidate the reasons behind  
29 patient delays,<sup>46-51,53</sup> with the ultimate goal of designing education programs and interventions that will result in  
30 timely help-seeking. Significant risk factors for help-seeking reluctance have been identified (e.g. Black race<sup>52,54,55</sup>)  
31 but much of the variation remains unexplained and we still lack a complete understanding of *why* certain patients  
32 and not others delay seeking aid.  
33  
34  
35  
36  
37  
38  
39  
40  
41  
42  
43  
44  
45  
46  
47  
48  
49

50 A distinction of our theory is movement of the focus of inquiry away from the disease and the patient’s  
51 relationship to the disease (e.g. health knowledge, symptom awareness, ability to comply with self-care regimens)  
52 and onto **patients’ sense of self** – their self-concepts and self-identity.<sup>56</sup> We hypothesize that illness behaviors  
53 may become “noncompliant” or “irrational” or “self-harming” when specific courses of action would create an  
54  
55  
56  
57  
58  
59  
60

1 internal conflict with patients' ideas of **who they are**. Specifically, we posit that people who strongly believe that  
2 they should manage their problems on their own, not show emotions, and not complain about physical  
3 discomfort will experience an internal cognitive conflict when faced with a situation that could require help from  
4 others. This internal conflict will lead to delays in or avoidance of help-seeking, with potentially life-threatening  
5 consequences. For example, empirical studies of increasing rates of male suicide in rural Australia have identified  
6 hegemonic masculine norms of stoicism as an important causal factor in the context of severe economic  
7 stress.<sup>57,58</sup> Understanding the influences of race, ethnicity, socioeconomic status, religion, and other cultural  
8 factors on stoic ideologies may help explain past research findings on delays in help-seeking. Finally, there may  
9 also be positive health consequences of stoic ideologies for individuals,<sup>15</sup> which careful prospective research could  
10 confirm.  
11  
12  
13  
14  
15  
16  
17  
18  
19  
20  
21  
22  
23  
24  
25  
26

#### 27 **FIGURE LEGENDS**

28  
29 Figure 1. Content Validity of the Pathak-Wieten Stoicism Ideology Scale: Mean Scores by Response to the  
30 Statement "I try to be a stoic"  
31

32  
33 Figure 2. Pathak-Wieten Stoicism Ideology Scale: Distribution of Domain Scores  
34

35 Figure 3. Pathak-Wieten Stoicism Ideology Scale: Distribution of Overall Scores by Gender  
36  
37  
38  
39  
40  
41  
42  
43  
44  
45  
46  
47  
48  
49  
50  
51  
52  
53  
54  
55  
56  
57  
58  
59  
60

Table 1. Characteristics of the Study Population (n=390)

|                           | Number | Percent |
|---------------------------|--------|---------|
| <b>Age</b>                |        |         |
| 18 – 24 years             | 303    | 77.7    |
| 25 + years                | 87     | 22.3    |
|                           |        |         |
| <b>Gender</b>             |        |         |
| Female                    | 221    | 56.7    |
| Male                      | 169    | 43.3    |
|                           |        |         |
| <b>Race and Ethnicity</b> |        |         |
| White                     | 215    | 55.1    |
| Black                     | 55     | 14.1    |
| Hispanic                  | 59     | 15.1    |
| Asian                     | 36     | 9.2     |
| Biracial/Other            | 25     | 6.4     |
|                           |        |         |
| <b>Nativity</b>           |        |         |
| USA (inc. Puerto Rico)    | 315    | 80.8    |
| Other                     | 75     | 19.2    |
|                           |        |         |

**Table 2. Pathak-Wieten Stoicism Ideology Scale (PW-SIS)**

Please read each statement and choose the answer that best reflects your own views.

| <input type="checkbox"/> Disagree                                                   | <input type="checkbox"/> Somewhat Disagree | <input type="checkbox"/> Not Sure | <input type="checkbox"/> Somewhat Agree | <input type="checkbox"/> Agree |
|-------------------------------------------------------------------------------------|--------------------------------------------|-----------------------------------|-----------------------------------------|--------------------------------|
| Item                                                                                | Domain                                     | Original Item #*                  |                                         |                                |
| 1. I expect myself to hide my aches and pains from others.                          | Stoic Endurance                            | Q2                                |                                         |                                |
| 2. I don't believe in talking about my personal problems.                           | Stoic Taciturnity                          | Q3                                |                                         |                                |
| 3. I expect myself to manage my physical discomfort without complaining.            | Stoic Endurance                            | Q5                                |                                         |                                |
| 4. I believe I should experience strong emotions. <i>[reverse code]</i>             | Stoic Serenity                             | Q8                                |                                         |                                |
| 5. When the time for my death comes, I believe I should accept it without fear.     | Stoic Death Indifference                   | Q12                               |                                         |                                |
| 6. I expect myself to hide my strong emotions from others.                          | Stoic Taciturnity                          | Q13                               |                                         |                                |
| 7. I would prefer to be unemotional.                                                | Stoic Serenity                             | Q14                               |                                         |                                |
| 8. I expect myself to manage my own problems without help from anyone.              | Stoic Taciturnity                          | Q15                               |                                         |                                |
| 9. I believe my physical pain is best handled by just keeping quiet about it.       | Stoic Endurance                            | Q17                               |                                         |                                |
| 10. I would be very upset if I knew my death was coming soon. <i>[reverse code]</i> | Stoic Death Indifference                   | Q18                               |                                         |                                |
| 11. I expect myself to avoid feeling intense emotions.                              | Stoic Serenity                             | Q20                               |                                         |                                |
| 12. I would not allow myself to be bothered by the fear of death.                   | Stoic Death Indifference                   | Q24                               |                                         |                                |

See Methods for scoring instructions

\* See Table S1 in the Technical Supplement, available online.

**Table 3. Conceptual Domains of the Pathak-Wieten Stoicism Ideology Scale**

| Domain                                                                                                                | Mean Score (95% CI)       | Cronbach's $\alpha$ | Correlation with ST Score | Correlation with SE Score | Correlation with SS Score | Correlation with SDI Score |
|-----------------------------------------------------------------------------------------------------------------------|---------------------------|---------------------|---------------------------|---------------------------|---------------------------|----------------------------|
| <b>Stoic Taciturnity (ST):</b><br>The belief that one should conceal one's problems and emotions from others (Modern) | -0.08<br>(-0.18 to +0.02) | 0.71                | 1.00                      | 0.59<br>$p < 0.0001$      | 0.53<br>$p < 0.0001$      | 0.09<br>$p = 0.0729$       |
| <b>Stoic Endurance (SE):</b><br>The belief that one should endure physical suffering without complaining (Modern)     | +0.04<br>(-0.06 to +0.13) | 0.65                | 0.59<br>$p < 0.0001$      | 1.00                      | 0.35<br>$p < 0.0001$      | 0.18<br>$p = 0.0005$       |
| <b>Stoic Serenity (SS):</b><br>The belief that one should refrain from experiencing strong emotions (Classical)       | -0.66<br>(-0.75 to -0.56) | 0.64                | 0.53<br>$p < 0.0001$      | 0.35<br>$p < 0.0001$      | 1.00                      | 0.15<br>$p = 0.0031$       |
| <b>Stoic Death Indifference (SDI):</b><br>The belief that one should not fear or avoid death (Classical)              | +0.08<br>(-0.03 to +0.18) | 0.69                | 0.09<br>$p = 0.0729$      | 0.18<br>$p = 0.0005$      | 0.15<br>$p = 0.0031$      | 1.00                       |
| <b>Stoicism Ideology Scale (PW-SIS)</b>                                                                               | -0.16<br>(-0.22 to -0.09) | 0.78                | 0.79<br>$p < 0.0001$      | 0.74<br>$p < 0.0001$      | 0.72<br>$p < 0.0001$      | 0.53<br>$p < 0.0001$       |

**Table 4. Sociodemographic Predictors of a Mean PW-SIS Score in the Top Quartile (> 0.167)**

|                        | Odds Ratio (95% CI) | p value |
|------------------------|---------------------|---------|
| <b>Age 18-24 years</b> | 1.00 (referent)     |         |
| <b>Age 25-73 years</b> | 1.34 (0.76 - 2.35)  | n.s.    |
| <b>Men</b>             | 2.30 (1.44 - 3.68)  | < 0.001 |
| <b>Women</b>           | 1.00 (referent)     |         |
| <b>Asian</b>           | 0.93 (0.38 - 2.25)  | n.s.    |
| <b>Black</b>           | 1.55 (0.78 - 3.09)  | n.s.    |
| <b>Biracial/Other</b>  | 1.70 (0.66 - 4.34)  | n.s.    |
| <b>Hispanic</b>        | 1.88 (0.99 - 3.56)  | n.s.    |
| <b>Whites</b>          | 1.00 (referent)     |         |
| <b>Born in the USA</b> | 1.97 (1.01 - 3.84)  | 0.048   |
| <b>Born elsewhere</b>  | 1.00 (referent)     |         |

## REFERENCES

1. Epictetus. *Enchiridion*. Long G, trans: Dover Publications; 2004.
2. Aurelius M. *Meditations*. Long G, trans: Dover Publications; 1997.
3. Baltzly D. Stoicism. In: Zalta EN, ed. *The Stanford Encyclopedia of Philosophy*. Winter 2010 Edition ed. Palo Alto CA: Stanford University; 2010.
4. Gowans CW. Medical analogies in Buddhist and Hellenistic thought: tranquility and anger. *Royal Institute of Philosophy Supplement*. 2010;66:11-33.
5. Wong DB. The meaning of detachment in Daoism, Buddhism, and Stoicism. *Dao: A Journal of Comparative Philosophy*. 2006;5(2):207-219.
6. Becker LC. Human health and stoic moral norms. *J Med Philos*. 2003;28(2):221-238.
7. Stempsey WE. A new stoic: the wise patient. *Med Philos*. 2004;29(4):451-472.
8. Moore A, Grime J, Campbell P, Richardson J. Troubling stoicism: Sociocultural influences and applications to health and illness behaviour. *Health* 2013;17(2):159-173.
9. Sargent C. Between death and shame: dimensions of pain in Bariba culture. *Soc Sci Med*. 1984;19(12):1299-1304.
10. Latimer M, Finley GA, Rudderham S, et al. Expression of pain among Mi'kmaq children in one Atlantic Canadian community: a qualitative study. *CMAJ Open*. 2014;2(3):e133-3138.
11. Te Karu L, Bryant L, Elley CR. Maori experiences and perceptions of gout and its treatment: a kaupapa Maori qualitative study. *J Prim Health Care*. 2013;5(3):214-222.
12. Caldwell JC, Orubuloye IO, Caldwell P. Underreaction to AIDS in Sub-Saharan Africa. *Soc Sci Med*. 1992;34(11):1169-1182.
13. Jarrett T. Warrior Resilience Training in Operation Iraqi Freedom: combining rational emotive behavior therapy, resiliency, and positive psychology. *US Army Med Dep J*. 2008 (Jul-Sep):32-38.
14. Jarrett TA. Warrior Resilience and Thriving (WRT): Rational Emotive Behavior Therapy (REBT) as a Resiliency and Thriving Foundation to Prepare Warriors and Their Families for Combat Deployment and Posttraumatic Growth in Operation Iraqi Freedom, 2005–2009. *J Rat-Emo Cognitive-Behav Ther* 2013;31.
15. Hutnick N, Smith P, Koch T. What does it feel like to be 100? Socio-emotional aspects of well-being in the stories of 16 centenarians living in the United Kingdom. *Aging & mental health*. 2012;16(7):811-818.
16. Waitzkin H, Britt T, Williams C. Narratives of aging and social problems in medical encounters with older persons. *J Health Soc Behav*. 1994;35(4):322-348.
17. Smiler AP. Thirty years after the discovery of gender: psychological concepts and measures of masculinity. *Sex Roles*. 2004;50(1):15-26.
18. Smiler AP. Conforming to masculine norms: evidence for validity among adult men and women? *Sex Roles*. 2006;54(767-775).
19. Mahalik JR, Locke BD, Ludlow LH, et al. Development of the Conformity to Masculine Norms Inventory. *Psychology of Men & Masculinity*. 2003;4(1):3-25.
20. Yong HH. Can attitudes of stoicism and cautiousness explain observed age-related variation in levels of self-rated pain, mood disturbance and functional interference in chronic pain patients? *Eur J Pain*. 2006;10(5):399-407.
21. Yong HH, Bell R, Workman B, Gibson SJ. Psychometric properties of the Pain Attitudes Questionnaire (revised) in adult patients with chronic pain. *Pain*. 2003;104(3):673-681.
22. Yong HH, Gibson SJ, Horne DJ, Helme RD. Development of a pain attitudes questionnaire to assess stoicism and cautiousness for possible age differences. *J Gerontol B Psychol Sci Soc Sci*. 2001;56(5):279-284.
23. Wagstaff G, Rowledge A. Stoicism: Its relation to gender, attitude toward poverty, and reactions to emotive material. *Journal of Social Psychology*. 1995;135:181-184.
24. Gaitniece-Putāne A. Liverpool Stoicism Scale Adaptation. *Baltic Journal of Psychology*. 2005;6(1):57-64.
25. Smith AR, Yeager AE, Dodd DR. The joint influence of acquired capability for suicide and stoicism on over-exercise among women. *Eating Behaviors*. 2015;17:77-82.



- 1
  - 2
  - 3
  - 4
  - 5
  - 6
  - 7
  - 8
  - 9
  - 10
  - 11
  - 12
  - 13
  - 14
  - 15
  - 16
  - 17
  - 18
  - 19
  - 20
  - 21
  - 22
  - 23
  - 24
  - 25
  - 26
  - 27
  - 28
  - 29
  - 30
  - 31
  - 32
  - 33
  - 34
  - 35
  - 36
  - 37
  - 38
  - 39
  - 40
  - 41
  - 42
  - 43
  - 44
  - 45
  - 46
  - 47
  - 48
  - 49
  - 50
  - 51
  - 52
  - 53
  - 54
  - 55
  - 56
  - 57
  - 58
  - 59
  - 60
26. Whealin JM, Kuhn E, Pietrzak RH. Applying behavior change theory to technology promoting veteran mental health care seeking. *Psychological Services*. 2014;11(4):486-494.
27. Witte TK, Gordon KH, Smith PN, Van Orden KA. Stoicism and sensation seeking: male vulnerabilities for the acquired capability for suicide. *Journal of Research in Personality*. 2012;46(4):384-392.
28. Charmaz K. Loss of self: a fundamental form of suffering in the chronically ill. *Sociology of Health and Illness*. 1983;5(2):168-195.
29. Hammond WP, Matthews D, Mohottige D, Agyemang A, Corbie-Smith G. Masculinity, medical mistrust, and preventive health services delays among community-dwelling African-American men. *Journal of general internal medicine*. 2010;25(12):1300-1308.
30. Levant RF, Rankin TJ, Williams CM, Hasan NT, Smalley KB. Evaluation of the factor structure and construct validity of scores on the Male Role Norms Inventory—Revised (MRNI-R). *Psychology of Men & Masculinity*. 2010;11(1):25-37.
31. Wheldon CW, Pathak EB. Masculinity and Relationship Agreements among Male Same-Sex Couples. *Journal of Sex Research*. 2010;47(5):460-470.
32. Devon HA, Block ME, Moyle-Wright P, et al. A Psychometric Toolbox for Testing Validity and Reliability. *Journal of Nursing Scholarship*. 2007;39(2):155-164.
33. Fabringer LR, Wegener DT, MacCallum RC, Straham EJ. Evaluating the Use of Exploratory Factor Analysis in Psychological Research. *Psychological Methods*. 1999;4(3):272-299.
34. Brotherton R, French CC, Pickering AD. Measuring belief in conspiracy theories: the generic conspiracist beliefs scale. *Frontiers in psychology*. 2013;4.
35. de Nooijer J, Puijk-Hekman S, van Assema P. The compensatory health beliefs scale: psychometric properties of a cross-culturally adapted scale for use in The Netherlands. *Health education research*. 2009;24(5):811-817.
36. Downey L, Curtis JR, Lafferty WE, Herting JR, Engelberg RA. The Quality of Dying and Death Questionnaire (QODD): empirical domains and theoretical perspectives. *Journal of pain and symptom management*. 2010;39(1):9-22.
37. Tabachnick BG, Fidell LS. *Using Multivariate Statistics*. Boston: Allyn and Bacon; 2001.
38. Glanz K, Rimer BK, Viswanath K, eds. *Health Behavior: Theory, Research, and Practice (Fifth Edition)*. San Francisco: Jossey-Bass; 2015.
39. Almberg B, Grafstrom M, Winblad B. Major strain and coping strategies as reported by family members who care for aged demented relatives. *J Adv Nurs*. 1997;26(4):683-691.
40. Clark AM, Savard LA, Spaling MA, Heath S, Duncan A, Spiers JA. Understanding help-seeking decisions in people with heart failure: a qualitative systematic review. *International journal of nursing studies*. 2012;49(12):1582-1597.
41. Moloczij N, McPherson KM, Smith JF, Kayes NM. Help-seeking at the time of stroke: stroke survivors' perspectives on their decisions. *Health & social care in the community*. 2008;16(5):501-510.
42. Caldwell MA, Miaskowski C. Mass media interventions to reduce help-seeking delay in people with symptoms of acute myocardial infarction: time for a new approach? *Patient Educ Couns*. 2002;46(1):1-9.
43. Lecouturier J, Rodgers H, Murtagh MJ, White M, Ford GA, Thomson RG. Systematic review of mass media interventions designed to improve public recognition of stroke symptoms, emergency response and early treatment. *BMC public health*. 2010;10.
44. Luca NR, Suggs LS. Theory and model use in social marketing health interventions. *Journal of health communication*. 2013;18(1):20-40.
45. Go AS, Mozaffarian D, Roger VL, et al. Heart disease and stroke statistics - 2014 update: a report from the American Heart Association. *Circulation*. 2014;129(3):e28-e292.
46. Zock E, Kerkhoff H, Kleyweg RP, van de Beek D. Intrinsic factors influencing help-seeking behavior in an acute stroke situation. *Acta neurologica Belgica*. 2016;116(3):295-301.
47. Mackintosh JE, Murtagh MJ, Rodgers H, Thomson RG, Ford GA, White M. Why people do, or do not, immediately contact emergency medical services following the onset of acute stroke: qualitative interview study. *PLOS One*. 2012;7(10).

- 1  
2 48. Davis LL, Mishe IM, Moser DK, Esposito N, Lynn MR, Schwartz TA. Thoughts and behaviors of women with  
3 symptoms of acute coronary syndrome. *Heart & lung : the journal of critical care*. 2013;42(6):428-435.  
4 49. Galdas PM, Johnson JL, Percy ME, Ratner PA. Help seeking for cardiac symptoms: beyond the masculine-  
5 feminine binary. *Soc Sci Med*. 2010;71(1):18-24.  
6 50. Whitaker KL, Macleod U, Winstanley K, Scott SE, Wardie J. Help seeking for cancer 'alarm' symptoms: a  
7 qualitative interview study of primary care patients in the UK. *Br J Gen Pract*. 2015;65(631):e96-e105.  
8 51. Yousaf O, Grunfeld EA, Hunter MS. A systematic review of the factors associated with delays in medical  
9 and psychological help-seeking among men. *Health Psychol Rev*. 2015;9(2):264-276.  
10 52. Powell W, Adams LB, Cole-Lewis Y, Agyemang A, Upton RD. Masculinity and race-related factors as  
11 barriers to help-seeking among African American men. *Behav Med*. 2016;42(3):150-163.  
12 53. Nymark C, Mattiasson AC, Henriksson P, Kiessling A. The turning point: from self-regulative illness  
13 behaviour to care-seeking in patients with an acute myocardial infarction. *Journal of clinical nursing*.  
14 2009;18(23):3358-3365.  
15 54. Lee H, Bahler R, Chung C, Alonzo A, Zeller RA. Prehospital delay with myocardial infarction: the interactive  
16 effect of clinical symptoms and race. *Applied nursing research : ANR*. 2000;13(3):125-133.  
17 55. Evangelista LS, Dracup K, Doering LV. Racial differences in treatment-seeking delays among heart failure  
18 patients. *Journal of cardiac failure*. 2002;8(6):381-386.  
19 56. Baumeister RF. Self and identity: a brief overview of what they are, what they do, and how they work.  
20 *Annals of the New York Academy of Sciences*. 2011;1234:48-55.  
21 57. Alston M. Rural male suicide in Australia. *Soc Sci Med*. 2012;74(4):515-522.  
22 58. Alston M, Kent J. The big dry: the link between rural masculinities and poor health outcomes for farming  
23 men. *Journal of Sociology*. 2008;44(2):133-147.  
24  
25  
26  
27  
28  
29  
30  
31  
32  
33  
34  
35  
36  
37  
38  
39  
40  
41  
42  
43  
44  
45  
46  
47  
48  
49  
50  
51  
52  
53  
54  
55  
56  
57  
58  
59  
60

**Figure 1.**  
**Content Validity of the Pathak-Wieten Stoicism Ideology Scale:**  
**Mean Scores by Response to the Statement “I try to be a stoic”**

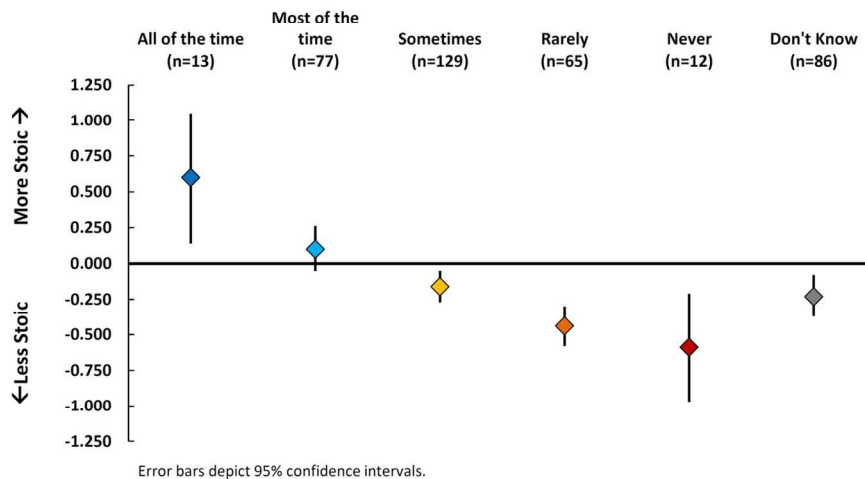

Figure 1. Content Validity of the Pathak-Wieten Stoicism Ideology Scale: Mean Scores by Response to the Statement “I try to be a stoic”

130x87mm (300 x 300 DPI)

1  
2  
3  
4  
5  
6  
7  
8  
9  
10  
11  
12  
13  
14  
15  
16  
17  
18  
19  
20  
21  
22  
23  
24  
25  
26  
27  
28  
29  
30  
31  
32  
33  
34  
35  
36  
37  
38  
39  
40  
41  
42  
43  
44  
45  
46  
47  
48  
49  
50  
51  
52  
53  
54  
55  
56  
57  
58  
59  
60

**Figure 2.**  
**Pathak-Wieten Stoicism Ideology Scale: Distribution of Domain Scores**

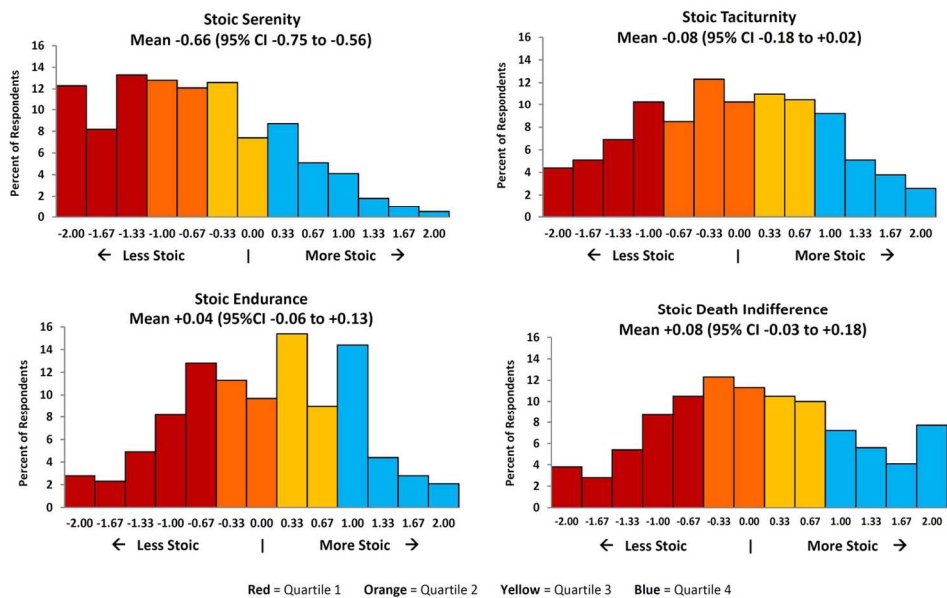

Figure 2. Pathak-Wieten Stoicism Ideology Scale: Distribution of Domain Scores

139x100mm (300 x 300 DPI)

**Figure 3.**  
**Pathak-Wieten Stoicism Ideology Scale: Distribution of Overall Scores by Gender**

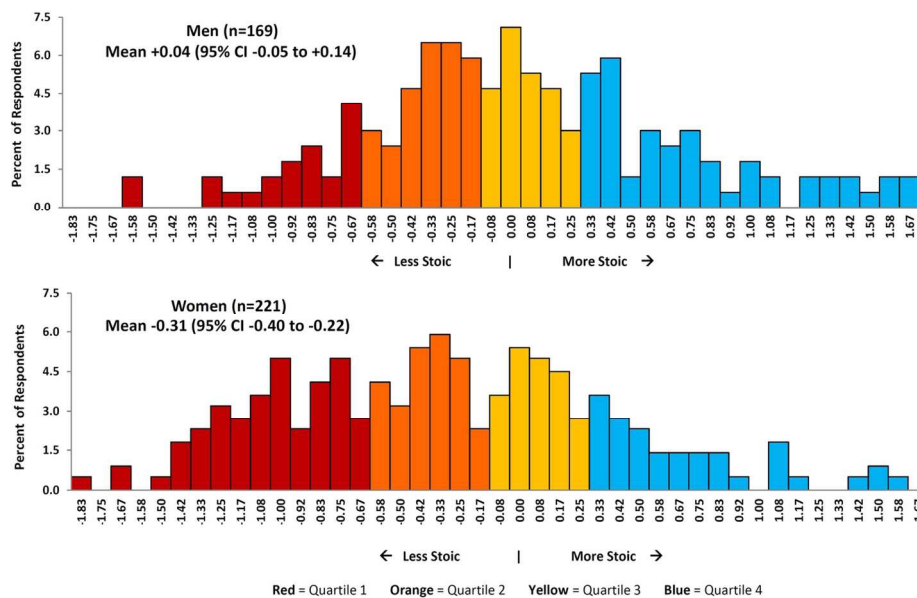

Figure 3. Pathak-Wieten Stoicism Ideology Scale: Distribution of Overall Scores by Gender

142x104mm (300 x 300 DPI)

**Pathak Stoicism Paper****Technical Supplement**

Scale items under each of the 5 domains along with response frequencies for the preliminary 24-item PW-SIS are shown in Table S1. The results of the assessment of redundancy and content validity (Step 1) are shown in Table S2. We dropped 2 items (Q1 and Q4) because they were highly correlated with other items. The entire Stoic Composure domain, with 4 questions, was dropped after consideration of content validity. At every level of response to the statement “I try to be a stoic,” from “never” to all “all the time,” responses to the 4 Stoic Composure items were highly pro-stoic. Furthermore, the overall response distributions for 3 of the 4 items (Q10, Q21, and Q22) were highly skewed, with only 7%, 4%, and 3% disagreeing with these statements (Table S1). There were no other items in the scale that resulted in such highly skewed response distributions. We concluded that this domain was referencing a strongly sanctioned social norm, and that while the items were not explicitly worded as aphorisms, they might be functioning in the same way. Some respondents may have been inhibited to admit that they did not believe that they should stay cool in an emergency, if they perceived that a strong socio-cultural norm existed. Interestingly, the only reverse-coded item under this domain, Q16: “I believe it’s okay to let myself get upset and distracted in a major crisis,” elicited a less skewed response, although the majority of respondents still disagreed with this statement. Given that there was only a single item which performed marginally well, we decided to drop the entire domain.

Confirmatory factor analysis of the reduced 18-item, 4-domain PW-SIS resulted in strong factor loadings for 16 of the 18 items (Table S2), and decent model fit statistics (Table S3). Both items which were dropped (Q23 and Q6) were reverse-code items. Removal of these 2 items resulted in slightly improved model fit statistics (Table S3) when the CFA was re-run on the remaining 16 items.

As shown in Table S2, the 16-item scale retained 6 items for Stoic Taciturnity, 4 items for Stoic Endurance, 3 items for Stoic Serenity, and 3 items for Stoic Death Indifference. In the interest of parsimony, we decided to remove an additional 4 items, so that the final scale would retain 3 items for each of the 4 domains. We dropped 3 items from Stoic Taciturnity (Q7, Q9, and Q19), and 1 item from Stoic Endurance (Q11) - all with the lowest

1 factor loadings, and all reverse-code items. Factor loadings for the remaining 12 items changed little in the final  
2  
3  
4 CFA model (Table S2), but model fit statistics improved so that the final RMSEA = 0.05 (95% CI 0.04-0.07),  
5  
6  
7 Goodness-of-Fit Index = 0.96, and Tucker-Lewis Index = 0.93.  
8  
9  
10  
11  
12  
13  
14  
15  
16  
17  
18  
19  
20  
21  
22  
23  
24  
25  
26  
27  
28  
29  
30  
31  
32  
33  
34  
35  
36  
37  
38  
39  
40  
41  
42  
43  
44  
45  
46  
47  
48  
49  
50  
51  
52  
53  
54  
55  
56  
57  
58  
59  
60

For peer review only

| Table S1. Preliminary Pathak-Wieten Stoicism Ideology Scale: Domains, Item Content, and Response Frequencies (n=390) |                                                                                                      |               |                        |              |                     |            |
|----------------------------------------------------------------------------------------------------------------------|------------------------------------------------------------------------------------------------------|---------------|------------------------|--------------|---------------------|------------|
| Original Item #                                                                                                      | Core Meaning / Scale Items                                                                           | Disagree (-2) | Somewhat Disagree (-1) | Not sure (0) | Somewhat Agree (+1) | Agree (+2) |
| <b>Stoic Taciturnity: The belief that one should conceal one's problems and emotions from others (Modern)</b>        |                                                                                                      |               |                        |              |                     |            |
| Q1                                                                                                                   | I prefer to keep my intense feelings to myself.                                                      | 10%           | 17%                    | 6%           | 40%                 | 27%        |
| Q3                                                                                                                   | I don't believe in talking about my personal problems.                                               | 23%           | 31%                    | 14%          | 26%                 | 6%         |
| Q7                                                                                                                   | I believe it's fine if I cry openly in front of other people. <i>(reverse)</i>                       | 31%           | 28%                    | 12%          | 18%                 | 11%        |
| Q9                                                                                                                   | I believe in discussing my personal problems with family and friends. <i>(reverse)</i>               | 3%            | 12%                    | 14%          | 37%                 | 33%        |
| Q13                                                                                                                  | I expect myself to hide my strong emotions from others.                                              | 13%           | 23%                    | 19%          | 32%                 | 13%        |
| Q15                                                                                                                  | I expect myself to manage my own problems without help from anyone.                                  | 16%           | 24%                    | 13%          | 34%                 | 13%        |
| Q19                                                                                                                  | If my emotions get very intense, I believe it's all right to just show them openly. <i>(reverse)</i> | 16%           | 25%                    | 23%          | 27%                 | 8%         |
| <b>Stoic Endurance: The belief that one should endure physical suffering without complaining (Modern)</b>            |                                                                                                      |               |                        |              |                     |            |
| Q2                                                                                                                   | I expect myself to hide my aches and pains from others.                                              | 8%            | 24%                    | 12%          | 41%                 | 15%        |
| Q4                                                                                                                   | I don't believe in bothering people close to me with my aches and pains.                             | 20%           | 27%                    | 14%          | 27%                 | 12%        |
| Q5                                                                                                                   | I expect myself to manage my physical discomfort without complaining.                                | 9%            | 18%                    | 14%          | 44%                 | 16%        |
| Q11                                                                                                                  | If I am suffering, I believe in telling someone about my physical pain. <i>(reverse)</i>             | 5%            | 9%                     | 16%          | 37%                 | 33%        |
| Q17                                                                                                                  | I believe my physical pain is best handled by just keeping quiet about it.                           | 29%           | 29%                    | 22%          | 15%                 | 5%         |
| Q23                                                                                                                  | I believe in letting myself complain about everyday aches and pains. <i>(reverse)</i>                | 39%           | 32%                    | 16%          | 11%                 | 3%         |
| <b>Stoic Composure: The belief that one should control one's emotions and behavior under stress (Modern)</b>         |                                                                                                      |               |                        |              |                     |            |
| Q10                                                                                                                  | I expect myself to remain calm and decisive in an emergency.                                         | 2%            | 5%                     | 11%          | 29%                 | 54%        |
| Q16                                                                                                                  | I believe it's okay to let myself get upset and distracted in a major crisis. <i>(reverse)</i>       | 29%           | 25%                    | 19%          | 19%                 | 7%         |
| Q21                                                                                                                  | I believe I should be calm and level-headed.                                                         | 2%            | 2%                     | 5%           | 35%                 | 56%        |
| Q22                                                                                                                  | I believe I should stay cool and steady when the pressure is high and the situation is tense.        | 1%            | 2%                     | 8%           | 36%                 | 54%        |
| <b>Stoic Serenity: The belief that one should refrain from experiencing strong emotions (Classical)</b>              |                                                                                                      |               |                        |              |                     |            |
| Q8                                                                                                                   | I believe I should experience strong emotions. <i>(reverse)</i>                                      | 4%            | 8%                     | 21%          | 33%                 | 34%        |
| Q14                                                                                                                  | I would prefer to be unemotional.                                                                    | 37%           | 20%                    | 17%          | 14%                 | 11%        |
| Q20                                                                                                                  | I expect myself to avoid feeling intense emotions.                                                   | 25%           | 31%                    | 19%          | 19%                 | 5%         |
| <b>Stoic Death Indifference: The belief that one should not fear or avoid death (Classical)</b>                      |                                                                                                      |               |                        |              |                     |            |
| Q6                                                                                                                   | I believe it's okay if I worry about dying too soon. <i>(reverse)</i>                                | 25%           | 16%                    | 24%          | 19%                 | 17%        |
| Q12                                                                                                                  | When the time for my death comes, I believe I should accept it without fear.                         | 8%            | 12%                    | 20%          | 21%                 | 39%        |
| Q18                                                                                                                  | I would be very upset if I knew my death was coming soon. <i>(reverse)</i>                           | 13%           | 6%                     | 22%          | 21%                 | 39%        |
| Q24                                                                                                                  | I would not allow myself to be bothered by the fear of death.                                        | 14%           | 19%                    | 26%          | 17%                 | 24%        |



Table S2. **Confirmatory Factor Analysis and Item Reduction** (n=390)

| Item                            | Core Meaning / Scale Items                                                                           | Step 1:<br>Assessment of Redundancy<br>and Content Validity | Step 2:<br>CFA of 4-Domain,<br>18-Item Scale<br>factor loadings | Step 3:<br>CFA of 4-Domain,<br>16-Item Scale<br>factor loadings | Step 4:<br>CFA of 4-Domain,<br>12-Item Final Scale<br>factor loadings |
|---------------------------------|------------------------------------------------------------------------------------------------------|-------------------------------------------------------------|-----------------------------------------------------------------|-----------------------------------------------------------------|-----------------------------------------------------------------------|
| <b>Stoic Taciturnity</b>        |                                                                                                      |                                                             |                                                                 |                                                                 |                                                                       |
| Q1                              | I prefer to keep my intense feelings to myself.                                                      | Redundant to Q13 (r = 0.54)                                 |                                                                 |                                                                 |                                                                       |
| Q3                              | I don't believe in talking about my personal problems.                                               |                                                             | 0.66                                                            | 0.67                                                            | 0.67                                                                  |
| Q7                              | I believe it's fine if I cry openly in front of other people. <i>(reverse)</i>                       |                                                             | 0.46                                                            | 0.46 <sup>a</sup>                                               |                                                                       |
| Q9                              | I believe in discussing my personal problems with family and friends. <i>(reverse)</i>               |                                                             | 0.55                                                            | 0.55 <sup>a</sup>                                               |                                                                       |
| Q13                             | I expect myself to hide my strong emotions from others.                                              |                                                             | 0.75                                                            | 0.75                                                            | 0.73                                                                  |
| Q15                             | I expect myself to manage my own problems without help from anyone.                                  |                                                             | 0.61                                                            | 0.61                                                            | 0.62                                                                  |
| Q19                             | If my emotions get very intense, I believe it's all right to just show them openly. <i>(reverse)</i> |                                                             | 0.49                                                            | 0.48 <sup>a</sup>                                               |                                                                       |
| <b>Stoic Endurance</b>          |                                                                                                      |                                                             |                                                                 |                                                                 |                                                                       |
| Q2                              | I expect myself to hide my aches and pains from others.                                              |                                                             | 0.65                                                            | 0.65                                                            | 0.68                                                                  |
| Q4                              | I don't believe in bothering people close to me with my aches and pains.                             | Redundant to Q3 (r = 0.57)                                  |                                                                 |                                                                 |                                                                       |
| Q5                              | I expect myself to manage my physical discomfort without complaining.                                |                                                             | 0.57                                                            | 0.56                                                            | 0.55                                                                  |
| Q11                             | If I am suffering, I believe in telling someone about my physical pain. <i>(reverse)</i>             |                                                             | 0.54                                                            | 0.55 <sup>a</sup>                                               |                                                                       |
| Q17                             | I believe my physical pain is best handled by just keeping quiet about it.                           |                                                             | 0.62                                                            | 0.62                                                            | 0.61                                                                  |
| Q23                             | I believe in letting myself complain about everyday aches and pains. <i>(reverse)</i>                |                                                             | 0.26 <sup>b</sup>                                               |                                                                 |                                                                       |
| <b>Stoic Composure</b>          |                                                                                                      |                                                             |                                                                 |                                                                 |                                                                       |
| Q10                             | I expect myself to remain calm and decisive in an emergency.                                         | Domain excluded <sup>c</sup>                                |                                                                 |                                                                 |                                                                       |
| Q16                             | I believe it's okay to let myself get upset and distracted in a major crisis. <i>(reverse)</i>       | Domain excluded <sup>c</sup>                                |                                                                 |                                                                 |                                                                       |
| Q21                             | I believe I should be calm and level-headed.                                                         | Domain excluded <sup>c</sup>                                |                                                                 |                                                                 |                                                                       |
| Q22                             | I believe I should stay cool and steady when the pressure is high and the situation is tense.        | Domain excluded <sup>c</sup>                                |                                                                 |                                                                 |                                                                       |
| <b>Stoic Serenity</b>           |                                                                                                      |                                                             |                                                                 |                                                                 |                                                                       |
| Q8                              | I believe I should experience strong emotions. <i>(reverse)</i>                                      |                                                             | 0.51                                                            | 0.51                                                            | 0.48                                                                  |
| Q14                             | I would prefer to be unemotional.                                                                    |                                                             | 0.70                                                            | 0.70                                                            | 0.71                                                                  |
| Q20                             | I expect myself to avoid feeling intense emotions.                                                   |                                                             | 0.62                                                            | 0.62                                                            | 0.63                                                                  |
| <b>Stoic Death Indifference</b> |                                                                                                      |                                                             |                                                                 |                                                                 |                                                                       |
| Q6                              | I believe it's okay if I worry about dying too soon. <i>(reverse)</i>                                |                                                             | 0.27 <sup>b</sup>                                               |                                                                 |                                                                       |
| Q12                             | When the time for my death comes, I believe I should accept it without fear.                         |                                                             | 0.61                                                            | 0.62                                                            | 0.63                                                                  |
| Q18                             | I would be very upset if I knew my death was coming soon. <i>(reverse)</i>                           |                                                             | 0.57                                                            | 0.57                                                            | 0.57                                                                  |
| Q24                             | I would not allow myself to be bothered by the fear of death.                                        |                                                             | 0.78                                                            | 0.76                                                            | 0.76                                                                  |

Footnotes: <sup>a</sup> = Excluded for parsimony; <sup>b</sup> = Excluded for poor factor loading; <sup>c</sup> = Excluded for poor content validity and highly skewed response distribution.

**Table S3. Model Fit Statistics for Confirmatory Factor Analysis of the PW-SIS**

| Model        | Description                                                                                                                                                                                                                                                                                          | Chi square      | df  | RMSEA (90% CI)         | Goodness-of-fit Index (GFI) | Adjusted GFI | Tucker-Lewis Index |
|--------------|------------------------------------------------------------------------------------------------------------------------------------------------------------------------------------------------------------------------------------------------------------------------------------------------------|-----------------|-----|------------------------|-----------------------------|--------------|--------------------|
|              | <b>Step 2:</b> After exclusion of 2 redundant items (q1 and q4) and 4 items from the Stoic Composure domain (q10, q16, q21, q22), confirmatory factor analysis (CFA) was performed on the 4-domain, 18-item PW-SIS.                                                                                  | 318<br>p <.0001 | 129 | 0.06<br>(0.05 to 0.07) | 0.91                        | 0.89         | 0.86               |
|              | <b>Step 3:</b> After exclusion of 2 items with poor factor loading (q6 and q23), CFA was performed on the 4-domain, 16-item PW-SIS.                                                                                                                                                                  | 264<br>p <.0001 | 98  | 0.07<br>(0.06 to 0.08) | 0.92                        | 0.89         | 0.89               |
| <b>Final</b> | <b>Step 4:</b> Factor loadings from Step 3 were examined, and for the purpose of parsimony, 4 additional items were excluded (q7, q9, q11, q19). Items with the strongest factor loadings in each domain were retained. The resulting 4-domain, 12-item PW-SIS has 3 items in each of the 4 domains. | 103<br>p <.0001 | 48  | 0.05<br>(0.04 to 0.07) | 0.96                        | 0.93         | 0.93               |

1  
2  
3  
4  
5  
6  
7  
8  
9  
10  
11  
12  
13  
14  
15  
16  
17  
18  
19  
20  
21  
22  
23  
24  
25  
26  
27  
28  
29  
30  
31  
32  
33  
34  
35  
36  
37  
38  
39  
40  
41  
42  
43  
44  
45  
46  
47  
48  
49

STROBE 2007 (v4) Statement—Checklist of items that should be included in reports of *cross-sectional studies*

| Section/Topic                | Item # | Recommendation                                                                                                                                                                       | Reported on page # |
|------------------------------|--------|--------------------------------------------------------------------------------------------------------------------------------------------------------------------------------------|--------------------|
| Title and abstract           | 1      | (a) Indicate the study's design with a commonly used term in the title or the abstract                                                                                               | 1                  |
|                              |        | (b) Provide in the abstract an informative and balanced summary of what was done and what was found                                                                                  | 2                  |
| <b>Introduction</b>          |        |                                                                                                                                                                                      |                    |
| Background/rationale         | 2      | Explain the scientific background and rationale for the investigation being reported                                                                                                 | 4-6                |
| Objectives                   | 3      | State specific objectives, including any prespecified hypotheses                                                                                                                     | 6                  |
| <b>Methods</b>               |        |                                                                                                                                                                                      |                    |
| Study design                 | 4      | Present key elements of study design early in the paper                                                                                                                              | 6-7                |
| Setting                      | 5      | Describe the setting, locations, and relevant dates, including periods of recruitment, exposure, follow-up, and data collection                                                      | 6-7                |
| Participants                 | 6      | (a) Give the eligibility criteria, and the sources and methods of selection of participants                                                                                          | 6-7                |
| Variables                    | 7      | Clearly define all outcomes, exposures, predictors, potential confounders, and effect modifiers. Give diagnostic criteria, if applicable                                             | 7-8                |
| Data sources/<br>measurement | 8*     | For each variable of interest, give sources of data and details of methods of assessment (measurement). Describe comparability of assessment methods if there is more than one group | 7-8                |
| Bias                         | 9      | Describe any efforts to address potential sources of bias                                                                                                                            | <i>n.a.</i>        |
| Study size                   | 10     | Explain how the study size was arrived at                                                                                                                                            | 6-7                |
| Quantitative variables       | 11     | Explain how quantitative variables were handled in the analyses. If applicable, describe which groupings were chosen and why                                                         | 7-8                |
| Statistical methods          | 12     | (a) Describe all statistical methods, including those used to control for confounding                                                                                                | 7-8                |
|                              |        | (b) Describe any methods used to examine subgroups and interactions                                                                                                                  | 7-9                |
|                              |        | (c) Explain how missing data were addressed                                                                                                                                          | <i>n.a.</i>        |
|                              |        | (d) If applicable, describe analytical methods taking account of sampling strategy                                                                                                   | 7-9                |
|                              |        | (e) Describe any sensitivity analyses                                                                                                                                                | <i>n.a.</i>        |
| <b>Results</b>               |        |                                                                                                                                                                                      |                    |

|                          |     |                                                                                                                                                                                                              |       |
|--------------------------|-----|--------------------------------------------------------------------------------------------------------------------------------------------------------------------------------------------------------------|-------|
| Participants             | 13* | (a) Report numbers of individuals at each stage of study—eg numbers potentially eligible, examined for eligibility, confirmed eligible, included in the study, completing follow-up, and analysed            | 6-9   |
|                          |     | (b) Give reasons for non-participation at each stage                                                                                                                                                         | n.a.  |
|                          |     | (c) Consider use of a flow diagram                                                                                                                                                                           | n.a.  |
| Descriptive data         | 14* | (a) Give characteristics of study participants (eg demographic, clinical, social) and information on exposures and potential confounders                                                                     | 8     |
|                          |     | (b) Indicate number of participants with missing data for each variable of interest                                                                                                                          | n.a.  |
| Outcome data             | 15* | Report numbers of outcome events or summary measures                                                                                                                                                         | 8-9   |
| Main results             | 16  | (a) Give unadjusted estimates and, if applicable, confounder-adjusted estimates and their precision (eg, 95% confidence interval). Make clear which confounders were adjusted for and why they were included | 8-9   |
|                          |     | (b) Report category boundaries when continuous variables were categorized                                                                                                                                    | 8-9   |
|                          |     | (c) If relevant, consider translating estimates of relative risk into absolute risk for a meaningful time period                                                                                             | 8-9   |
| Other analyses           | 17  | Report other analyses done—eg analyses of subgroups and interactions, and sensitivity analyses                                                                                                               | 8-9   |
| <b>Discussion</b>        |     |                                                                                                                                                                                                              |       |
| Key results              | 18  | Summarise key results with reference to study objectives                                                                                                                                                     | 10    |
| Limitations              | 19  | Discuss limitations of the study, taking into account sources of potential bias or imprecision. Discuss both direction and magnitude of any potential bias                                                   | 11-12 |
| Interpretation           | 20  | Give a cautious overall interpretation of results considering objectives, limitations, multiplicity of analyses, results from similar studies, and other relevant evidence                                   | 10-13 |
| Generalisability         | 21  | Discuss the generalisability (external validity) of the study results                                                                                                                                        | 11-13 |
| <b>Other information</b> |     |                                                                                                                                                                                                              |       |
| Funding                  | 22  | Give the source of funding and the role of the funders for the present study and, if applicable, for the original study on which the present article is based                                                | 1     |

\*Give information separately for cases and controls in case-control studies and, if applicable, for exposed and unexposed groups in cohort and cross-sectional studies.

**Note:** An Explanation and Elaboration article discusses each checklist item and gives methodological background and published examples of transparent reporting. The STROBE checklist is best used in conjunction with this article (freely available on the Web sites of PLoS Medicine at <http://www.plosmedicine.org/>, Annals of Internal Medicine at <http://www.annals.org/>, and Epidemiology at <http://www.epidem.com/>). Information on the STROBE Initiative is available at [www.strobe-statement.org](http://www.strobe-statement.org).

# BMJ Open

## Stoic Beliefs and Health: Development and Preliminary Validation of the Pathak-Wieten Stoicism Ideology Scale

|                                    |                                                                                                                                                                                                                                                                                              |
|------------------------------------|----------------------------------------------------------------------------------------------------------------------------------------------------------------------------------------------------------------------------------------------------------------------------------------------|
| Journal:                           | <i>BMJ Open</i>                                                                                                                                                                                                                                                                              |
| Manuscript ID                      | bmjopen-2016-015137.R2                                                                                                                                                                                                                                                                       |
| Article Type:                      | Research                                                                                                                                                                                                                                                                                     |
| Date Submitted by the Author:      | 31-Jul-2017                                                                                                                                                                                                                                                                                  |
| Complete List of Authors:          | Pathak, Elizabeth; University of South Florida, Morsani College of Medicine<br>Wieten, Sarah; University of South Florida, Department of Philosophy and<br>Morsani College of Medicine<br>Wheldon, Christopher W.; University of South Florida, Department of<br>Community and Family Health |
| <b>Primary Subject<br>Heading</b>: | Patient-centred medicine                                                                                                                                                                                                                                                                     |
| Secondary Subject Heading:         | Epidemiology, Health services research, Research methods, Public health                                                                                                                                                                                                                      |
| Keywords:                          | stoicism, help-seeking, health behavior theories, masculinity, patient<br>perspectives, gender                                                                                                                                                                                               |
|                                    |                                                                                                                                                                                                                                                                                              |

SCHOLARONE™  
Manuscripts

Peer Review Only

1  
2  
3  
4  
5  
6  
7  
8  
9  
10  
11  
12  
13  
14  
15  
16  
17  
18  
19  
20  
21  
22  
23  
24  
25  
26  
27  
28  
29  
30  
31  
32  
33  
34  
35  
36  
37  
38  
39  
40  
41  
42  
43  
44  
45  
46  
47  
48  
49  
50  
51  
52  
53  
54  
55  
56  
57  
58  
59  
60

## Stoic Beliefs and Health: Development and Preliminary Validation of the Pathak-Wieten Stoicism Ideology Scale

**Elizabeth Barnett Pathak, PhD, MSPH, FAHA**

Department of Internal Medicine  
Morsani College of Medicine, University of South Florida

**Sarah Wieten, MA**

Department of Philosophy  
Department of Internal Medicine  
Morsani College of Medicine, University of South Florida

**Christopher W. Wheldon, PhD**

Department of Community and Family Health  
College of Public Health, University of South Florida

**Acknowledgements:** The authors are grateful to the respondents for their voluntary participation in this study. We would particularly like to thank the 4 peer reviewers of this manuscript, whose detailed and thoughtful readings resulted in a substantially improved final paper.

**Contributors:** EBP conceived the study. EBP and SW developed the preliminary PW-SIS. All authors enrolled participants and collected questionnaire data. CW contributed statistical expertise to the confirmatory factor analysis. EBP analyzed the data. All authors interpreted the results and outlined the paper. EBP drafted the manuscript. All authors contributed to literature review and substantive revisions to the paper.

**Funding:** This study was unfunded.

**Competing Interests:** The authors have no competing interests.

**Data Sharing:** No additional data available.

**Corresponding Author:** Dr. Elizabeth Pathak ([dr.elizabeth.pathak@gmail.com](mailto:dr.elizabeth.pathak@gmail.com), 1-813-610-8715)

**ABSTRACT**

**Introduction:** We developed and validated a new parsimonious scale to measure stoic beliefs. Key domains of stoicism are imperviousness to strong emotions, indifference to death, taciturnity, and self-sufficiency. In the context of illness and disease, a personal ideology of stoicism may create an internal resistance to objective needs, which can lead to negative consequences. Stoicism has been linked to help-seeking delays, inadequate pain treatment, caregiver strain, and suicide after economic stress.

**Methods:** During 2013-2014, 390 adults aged 18+ years completed a brief anonymous paper questionnaire containing the preliminary 24-item Pathak-Wieten Stoicism Ideology Scale (PW-SIS). Confirmatory factor analysis (CFA) was used to test an *a priori* multi-domain theoretical model. Content validity and response distributions were examined. Socio-demographic predictors of strong endorsement of stoicism were explored with logistic regression.

**Results:** The final PW-SIS contains 4 conceptual domains and 12 items. CFA showed very good model fit: RMSEA = 0.05 (95% CI 0.04-0.07), Goodness-of-Fit Index = 0.96 and Tucker-Lewis Index = 0.93. Cronbach's alpha was 0.78 and ranged from 0.64 to 0.71 for the sub-scales. Content validity analysis showed a statistically significant trend, with respondents who reported trying to be a stoic "all of the time" having the highest PW-SIS scores. Men were over two times as likely as women to fall into the top quartile of responses (OR=2.30, 95% CI 1.44 to 3.68,  $p<0.001$ ). Odds ratios showing stronger endorsement of stoicism by Hispanics, Blacks, and Biracial persons were not statistically significant.

**Discussion:** The PW-SIS is a valid and theoretically coherent scale which is brief and practical for integration into a wide range of health behavior and outcomes research studies.

## Strengths and Limitations

- The Pathak-Wieten Stoicism Ideology Scale (PW-SIS) is a new, theoretically coherent, multi-dimensional scale which measures stoic beliefs and sense of self along 4 domains: Stoic Taciturnity, Stoic Endurance, Stoic Serenity, and Stoic Death Indifference.
- The PW-SIS contains 12 items and demonstrates good psychometric properties and content validity in a large sample (n=390) of educated adults.
- Mean stoicism ideology scores were higher for men than women, but for both genders the most frequent scores were neutral on stoic ideology, and the response distributions by gender overlapped almost completely.
- Further validation of the PW-SIS in demographically and socioeconomically diverse populations will improve its generalizability.



## INTRODUCTION

Stoicism is a school of philosophy which originated in ancient Greece.<sup>1-3</sup> Core elements in the classical definition of stoicism were an idealization of imperviousness to strong emotions, and an indifference to death.<sup>3</sup> Major Asian philosophical systems of thought, such as Buddhism and Confucianism, also endorsed stoic principles and teachings.<sup>4,5</sup> Beginning in the 19<sup>th</sup> century, academic and popular philosophers in Europe and the Americas were exposed to and influenced by Asian philosophy and religion. Therefore, it may not always be possible to distinguish whether particular strands of contemporary thought associated with stoicism originated in ancient Greece, ancient India, or elsewhere. For example, using very different language and symbolism, both the Greek Stoics and the Buddha exhorted the student to live fully and completely in the present, while minimizing concern about the future.

Contemporary meanings and connotations of stoicism have expanded beyond their ancient origins, to include ideals of taciturnity and self-sufficiency.<sup>6-8</sup> Today, the philosophical principles of stoicism can be seen to closely align with some personal ideologies, values and behaviors which are commonplace across many industrial nations, and are evident in many non-Western cultures as well.<sup>9-12</sup> For example, in the USA, the armed forces have explicitly embraced stoic ideology as a tool for mitigating combat stress.<sup>13,14</sup>

### **Previous Research on Stoicism and Health**

Much of the previous health-related research which mentions stoicism has invoked the term as a descriptor of particular patient groups or behaviors, without an explicit theoretical context.<sup>8</sup> Stoicism is mentioned most frequently in studies related to pain (particularly cancer pain) and coping strategies; indeed stoicism has been labeled a “coping strategy” in more than one study.<sup>6-8,15,16</sup> Stoicism has also been invoked as a defining characteristic of masculinity and as a key explanatory factor for certain health behaviors and outcomes among men. There are several psychometric instruments that measure endorsement or adherence to social norms of masculinity, but these scales include only a few items which explicitly assess stoicism.<sup>17-19</sup>

Direct measurement of stoicism in previous health-related measures has implicitly defined stoicism as a pattern of behaviors, not as an ideology. The pain attitudes questionnaire (PAQ), published in 2001, has a brief

1 subset of questions focused on stoic responses to physical pain.<sup>20-22</sup> The stoicism items in this scale were designed  
2 to capture pain coping strategies of chronically ill or injured patients. Of the 29 items in the PAQ, most measured  
3 past actions (i.e. pattern of behavior) and only 2 were explicitly focused on ideology: #2 “When I am in pain I  
4 should keep it to myself,” and #24 “Pain is something that should be ignored.” The 20-item Liverpool Stoicism  
5 Scale (LSS) (Table 1) was first published in 1995<sup>23</sup> and has not been widely used.<sup>24-27</sup> The LSS predominantly (16 of  
6 20 items) assesses a single theoretical domain (stoic taciturnity) of the 4 validated theoretical domains included in  
7 the final PW-SIS scale.  
8

9 Furthermore, the majority of items in the LSS focus on behavior or conduct, e.g. “I tend not to express my  
10 emotions.” However, there are 3 items that are ideological, e.g. “One should keep a ‘stiff upper lip’.” Both the LSS  
11 and the PAQ contain statements that are aphorisms (i.e. “Pain is something that should be ignored”) or proverbs  
12 (i.e. “A problem shared is a problem halved”). We consider these formats problematic, because these statements  
13 do not refer explicitly to the respondent. Consequently agreement cannot be interpreted as a reflection of self-  
14 identity. Furthermore, aphorisms and proverbs may invite endorsement to a great extent simply because of  
15 familiarity. In fact, Yong et al found that item #24, “Pain is something that should be ignored,” on the PAQ had a  
16 low alpha and reduced the internal consistency of their scale.<sup>21</sup>  
17

### 18 **Theoretical Context**

19 In 1983, Kathy Charmaz published a very influential sociological study on the “loss of self” suffered by  
20 people with chronic illnesses.<sup>28</sup> Although stoicism *per se* was mentioned only briefly, the idea that the suffering  
21 caused by disease emerges as much (or more) from threats to a person’s identity and sense of self as from purely  
22 bodily experiences of pathophysiology is one of the theoretical underpinnings of our work.  
23

24 In this report, we attempt to articulate an explicit theory of stoicism and its potential impact on health.  
25 We theorize that stoicism is a system for self-regulation rather than a behavior or personality trait. As a guide to  
26 ideal self-conduct, it requires self-conscious implementation and regular enforcement; in other words, stoicism is  
27 an ideology (e.g. a belief system which informs one’s attitudes and actions with the inherent potential for internal  
28 resistance and conflict). Personal ideologies create expectations for people about who they are, as well as how  
29  
30  
31  
32  
33  
34  
35  
36  
37  
38  
39  
40  
41  
42  
43  
44  
45  
46  
47  
48  
49  
50  
51  
52  
53  
54  
55  
56  
57  
58  
59  
60

1 they should and should not behave. For example, we theorize that people who strongly endorse a personal  
2 ideology of stoicism may be more likely to avoid or delay seeking professional medical intervention for serious  
3 signs and symptoms of disease. This personal ideology of self will not mandate behavior in a deterministic fashion;  
4 rather, stoicism will create expectations of ideal behavior (which may not always be met). In order to test these  
5 theoretical propositions in future research, a validated measure of an individual's endorsement of stoic ideologies  
6 is needed.

7  
8  
9  
10  
11  
12  
13  
14  
15  
16 The purpose of our study was to develop a theoretically coherent multi-dimensional scale to assess  
17 endorsement of a personal ideology of stoicism, and to empirically validate this scale in a multiethnic sample of  
18 healthy community-dwelling adults. We present the results of confirmatory factor analysis of the multi-domain  
19 Pathak-Wieten Stoicism Ideology Scale (PW-SIS), and discuss the potential usefulness of this tool for predicting  
20 constraints in health-related help-seeking behaviors. The PW-SIS is a generalized scale which assesses stoic beliefs  
21 and sense of self but does not explicitly measure health behaviors or health outcomes. Therefore the PW-SIS can  
22 be used in a wide range of empirical research studies.

23  
24  
25  
26  
27  
28  
29  
30  
31  
32 In addition, in this report we conducted an exploratory assessment of the association between high  
33 endorsement of stoicism and participant age, gender, and race and ethnicity. We expect stoic ideologies to be  
34 embedded in larger system of cultural beliefs that may be related to age, gender, race and ethnicity, and other  
35 social characteristics.

## 36 37 38 39 40 41 42 43 **METHODS**

### 44 45 **Conceptual Development of the Stoicism Ideology Scale**

46  
47 Drawing on multiple scholarly and popular sources,<sup>1-3,6,15,29-31</sup> we developed the preliminary 24-item  
48 Stoicism Ideology Scale (PW-SIS) to capture endorsement of 5 dimensions of stoicism (see Table S1 in the  
49 Technical Supplement, available online). Based on our literature review and expert (SW) knowledge of philosophy,  
50 we defined each domain as follows:

51  
52  
53  
54  
55  
56  
57 *Stoic Taciturnity* is the belief that one should conceal one's problems and emotions from others.

58  
59  
60 *Stoic Endurance* is the belief that one should endure physical suffering without complaining.

1  
2 *Stoic Composure* is the belief that one should control one's emotions and behavior under stress.

3 *Stoic Serenity* is the belief that one should refrain from experiencing strong emotions.

4 *Stoic Death Indifference* is the belief that one should not fear or avoid death.  
5  
6

7 Each item in our scale was carefully worded to capture the respondents' ideology, not their past behavior, using a  
8  
9 5-point Likert response scale with the following responses: "disagree," "somewhat disagree," "not sure,"  
10  
11 "somewhat agree," and "agree." Nine of the original 24 items were "reverse" items that specified anti-stoic  
12  
13 beliefs, i.e. "I believe I should experience strong emotions." The participant version of the scale (pen and paper  
14  
15 questionnaire) listed response codes of 0 (disagree) through 4 (agree). These responses were re-coded during  
16  
17 analysis to range from -2 (disagree) to +2 (agree). Consequently an average score of 0 corresponds to a neutral  
18  
19 stance – neither endorsement nor rejection of stoicism. Positive scores indicate endorsement of a stoic ideology,  
20  
21 while negative scores indicate rejection of a stoic ideology.  
22  
23  
24

### 25 Data Collection 26

27  
28 This study was approved by the Institutional Review Board (IRB) of the University of South Florida. Data  
29  
30 were collected over a period of 10 months during 2013-2014. All participants were university employees or  
31  
32 students. Written consent forms were waived by the IRB to ensure respondent anonymity but all participants  
33  
34 provided verbal informed consent. Each participant completed a brief paper-and-pencil questionnaire consisting  
35  
36 of the 24-item preliminary PW-SIS, socio-demographic questions, and a final single item "I try to be a stoic" with a  
37  
38 7-item response scale ranging from "never" to "all the time." The study population consisted of a convenience  
39  
40 sample of 390 adults aged 18 years and older who were recruited in person by the authors in public common  
41  
42 areas of university facilities (e.g. cafeterias), using walk-up tables. Monetary incentives were not provided to  
43  
44 participants. A study response rate could not be calculated due to the data collection methods.  
45  
46  
47

### 48 Data Analyses 49

50  
51 Data analysis proceeded in 5 steps. During Step 1, we examined univariate response distributions for each  
52  
53 of the 24 scale items. A simple correlation matrix was examined to identify redundant items. Finally, we assessed  
54  
55 content validity based on agreement with the statement "I try to be a stoic." As a result of Step 1 analyses, 6  
56  
57  
58  
59  
60

1 items were dropped from further analyses - including the entire Stoic Composure domain. Further details of this  
2  
3  
4 scale reduction step are included in the Technical Supplement, including Table S2.

5  
6 During Step 2, we conducted a confirmatory factor analysis (CFA) of the reduced 18-item PW-SIS. CFA is  
7  
8 the appropriate analytic choice to test scales that have an *a priori*, theoretically explicit sub-domain structure.<sup>32-36</sup>  
9  
10 We used *proc calis* in SAS 9.4 for the CFA. Based on the results of the first CFA, we eliminated 2 items with poor  
11  
12 factor loadings (see Technical Supplement for details).  
13  
14

15  
16 During Step 3, we repeated the CFA on the reduced 16-item PW-SIS. Finally, for the purpose of parsimony  
17  
18 we further reduced the total number of scale items to 12 (3 items in each of 4 domains) and conducted a CFA on  
19  
20 the final 12-item version of the PW-SIS (Step 4; see Table S3). Additional details and rationale for analytic Steps 1-  
21  
22 4, including data tables S1-S3, are provided in the Technical Supplement, available online.  
23  
24

25 Step 5 of our analysis consisted of preliminary content validation, examination of response distributions  
26  
27 for the overall and domain scores, and exploratory logistic regression modeling of socio-demographic predictors  
28  
29 of strong endorsement of stoicism. For the logistic regression analysis, we categorized the outcome using the top  
30  
31 quartile of the overall distribution of responses to represent strong endorsement of stoicism.  
32  
33  
34  
35

## 36 RESULTS

37  
38 The size of our study population (n=390) provided more than 15 respondents for each question in the  
39  
40 preliminary scale, which exceeds the widely accepted norm of at least 10 respondents per question.<sup>37</sup> Although  
41  
42 skewed toward younger adults (78% of respondents were < 25 years old), the study population was in other  
43  
44 respects diverse (Table 2). A majority self-identified as female (57%) and white (55%). Hispanics (15%) and Blacks  
45  
46 (14%) were the second and third largest racial/ethnic groups, followed by Asians (9%) and biracial or other  
47  
48 ethnicity (6%). A substantial minority of respondents (19%) were born outside the U.S or Puerto Rico.  
49  
50  
51

52 The final 4-domain, 12-item Pathak-Wieten Stoicism Ideology Scale is shown in Table 3. Confirmatory  
53  
54 factor analysis of the final scale showed very good model fit with individual item factor loadings ranging from 0.48  
55  
56 to 0.76, RMSEA = 0.05 (95% CI 0.04-0.07), Goodness-of-Fit Index = 0.96 and Tucker-Lewis Index = 0.93.  
57  
58  
59  
60

1 Relationships among the PW-SIS and its four conceptual domains are shown in Table 4. Cronbach's alpha  
2 ranged from 0.64 to 0.71 for the sub-scales and was 0.78 for the 12-item PW-SIS. Scores for Stoic Taciturnity were  
3 strongly correlated with scores for both Stoic Endurance and Stoic Serenity, but Stoic Endurance and Stoic  
4 Serenity were not highly correlated with each other. Stoic Death Indifference had the highest (most stoic) mean  
5 scores among the four domains, and it was least correlated with the other three domains.  
6  
7

8 Figure 1 depicts mean PW-SIS scores by response to the statement "I try to be a stoic." There was a clear  
9 monotonic and statistically significant trend, with respondents who reported trying to be a stoic "all of the time"  
10 having the highest stoicism scores, and respondents who reported trying to be a stoic "never" having the lowest  
11 stoicism scores. Most respondents chose one of the 3 intermediate categories. Respondents who chose "I don't  
12 know" as their response had stoicism scores similar to those who said they "sometimes" tried to be a stoic.  
13  
14

15 The distributions of mean scores for the 4 conceptual domain sub-scales are shown in Figure 2. Domain  
16 scores are comprised of the mean score for the 3 questions in the domain. In this study population, respondents  
17 were least likely to endorse Stoic Serenity and most likely to endorse Stoic Death Indifference.  
18  
19

20 The full distribution of respondent scores is shown separately for women and men in Figure 3. The  
21 distributions overlapped almost completely, but there were no men with the least stoic scores, and no women  
22 with the most stoic scores. Response distributions were skewed to the left for women (less stoic) and to the right  
23 for men (more stoic), consistent with a statistically significant difference in the mean scores for women (-0.31,  
24 95% CI -0.40 to -0.22) and men (+0.04, 95% CI -0.05 to +0.14).  
25  
26

27 Results of an exploratory analysis of sociodemographic predictors of high endorsement of stoicism are  
28 shown in Table 5. There is no *a priori* cut point designated as "highly stoic" in the PW-SIS; in this analysis the cut  
29 point used was a mean score greater than the 75<sup>th</sup> percentile of the overall response distribution. The top quartile  
30 of the distribution of all respondents (n=390) ranged from +0.33 to +1.67. Among women, 18.9% strongly  
31 endorsed stoicism, compared with 32.8% of men. After multivariate adjustment, men were over two times as  
32 likely as women to fall into the top quartile of responses (OR=2.30, 95% CI 1.44 to 3.68, p<0.001). Adults born in  
33 the USA or Puerto Rico were also twice as likely as adults born elsewhere to strongly endorse stoicism (OR=1.97,  
34  
35  
36  
37  
38  
39  
40  
41  
42  
43  
44  
45  
46  
47  
48  
49  
50  
51  
52  
53  
54  
55  
56  
57  
58  
59  
60

1  
2 95% CI 1.01 to 3.84,  $p=0.048$ ). Odds ratios showing stronger endorsement of stoicism by Hispanics, Blacks, Biracial  
3  
4 persons, and adults 25 years and older were not statistically significant.  
5  
6  
7

## 8 **DISCUSSION**

10 The Pathak-Wieten Stoicism Ideology Scale is a theoretically coherent, multi-dimensional scale which  
11 demonstrates good psychometric properties and content validity based on initial validation in a large sample of  
12 educated adults. The PW-SIS is also brief and practical for integration into a wide range of empirical research  
13 studies. In our study population of mostly younger adults, endorsement of stoicism varied by conceptual domain,  
14 with the weakest endorsement of the classical domain Stoic Serenity (aversion to strong emotions). Exploratory  
15 logistic regression analysis identified male gender and USA birth as significant predictors of strong endorsement of  
16 stoicism. Finally, point estimates suggested higher endorsement of stoicism for Blacks, Hispanics, and Biracial  
17 persons compared with Whites, but these results were not statistically significant.  
18  
19  
20  
21  
22  
23  
24  
25  
26  
27  
28

29 Integration of our theory of a stoic ideology of the self into existing health behavior models could help  
30 explain the formation of beliefs and attitudes toward criterion-specific help-seeking behaviors. Reasoned action  
31 approaches - such as the Integrative Model of Behavior Prediction - poorly define background factors that  
32 underlie belief formation.<sup>38</sup> Measurement of self-concepts, such as stoicism ideologies, may help explain this  
33 population variability. Expanding health behavior theory to include aspects of the self could also help inform  
34 health education messaging and risk-based communication.  
35  
36  
37  
38  
39  
40  
41  
42

43 Ironically, a personal ideology of stoicism almost guarantees failure to live up to one's personal ideal.  
44 Experiences of illness and disease often involve transient weakness and functional limitations. With aging, these  
45 experiences will increase in frequency, duration, and severity for most people. Simply put, experiences of illness  
46 and disease tend to require aid – whether from health professionals in a formal context, or from family members  
47 or friends in an informal context. An ideology of stoicism creates an internal resistance to external objective  
48 needs, which can lead to negative consequences.<sup>8-12</sup>  
49  
50  
51  
52  
53  
54  
55  
56  
57  
58  
59  
60

## **Gender and Stoicism**

Stoicism is widely viewed as a defining attribute of masculinity. Instruments designed to assess endorsement of hegemonic masculine ideologies have included specific questions that touch on stoicism. However, the conceptual and measurement overlap between these instruments and the 4-domain PW-SIS is minor.<sup>17</sup> For example, in the widely used Personal Attributes Questionnaire, only 2 of 24 items relate to a single domain of the PW-SIS. The Conformance to Masculine Norms scale assesses 11 distinct domains of masculinity, of which only 2 (emotional control and self-reliance) partially overlap with domains of the PW-SIS.<sup>18,19</sup> In our study, the results are notable because for both genders the most frequent scores were in the middle of the distribution (neutral on stoic ideology), and the response distributions for women and men overlapped almost completely. Despite the fact that men were twice as likely as women to strongly endorse stoic ideology, our results suggest that gendered stereotypes about stoicism (“stoic men” and “emotional women”) are overblown. Because the PW-SIS is agnostic to respondents’ genders, it is ideally suited to investigate the empirical reality of stoicism among both women and men. Furthermore, our finding that a minority of women strongly endorsed stoic ideology may be particularly important. For example, a study of major strain among family caretakers of elderly dementia patients found that those who used stoicism as a coping strategy suffered burnout, while those who sought social support did not.<sup>39</sup>

## **Study Limitations**

In any questionnaire-based scale, validity of the individual items and the total scale against the concept of interest is of paramount concern. Unlike many psychometric instruments, the PW-SIS does not purport to measure a latent, inherent trait such as personality, or a clinically-definable disorder such as depression or anxiety. Rather, we attempt to measure an explicit set of beliefs, which by definition are neither inborn nor immutable. Therefore, a robust assessment of the content validity of our scale items must come after publication and evaluation by multiple experts and researchers. We included a single questionnaire item “I try to be a stoic” to assess content validity, but future validation and outcome studies could expand on this approach or include a qualitative component.



1  
2 A related question pertains to the predictive validity of the PW-SIS. In other words, to what extent does  
3 strong endorsement of stoic ideology predict actual stoic behaviors? Predictive validity can only be rigorously  
4 addressed through prospective study designs.  
5  
6  
7

8 Our study population, similar to many scale validation studies, was university-based. Therefore validity  
9 and generalizability to very different populations should not be assumed, but instead tested in future studies. In  
10 particular, validation of the PW-SIS among the elderly and persons of lower educational attainment would be  
11 valuable for health-related research.  
12  
13  
14  
15  
16

### 17 **Strengths of the PW-SIS**

18 Our scale has several strengths. First, all items refer explicitly to the respondent; there are no aphorisms  
19 or proverbs. Second, each item refers to an expectation or belief about ideal self-conduct, rather than to a simple  
20 description of past behavior. So for example, Q5 states “I expect myself to manage my physical discomfort  
21 without complaining” rather than “I always manage my physical discomfort without complaining.” This distinction  
22 is critical to the theoretical underpinnings of the scale. Thirdly, we deliberately chose not to mention disease or  
23 illness in the scale items, so that the scale would be appropriate for a wide range of study populations, including  
24 currently healthy individuals. (Although some items do explicitly mention “physical pain” and “everyday aches and  
25 pains.”) Our intention was to capture the respondents’ *global* endorsement of stoicism as a *code of ideal conduct*.  
26  
27 Finally, the PW-SIS does not reference gender norms, so it can serve as a tool to empirically investigate gender  
28 differences in stoic ideology.  
29  
30  
31  
32  
33  
34  
35  
36  
37  
38  
39  
40  
41  
42

### 43 **Directions for future research**

44 The PW-SIS should be validated in multiple study populations with a range of socioeconomic and  
45 demographic characteristics. Our theory that ideologies of stoicism will result in constraints on health-related  
46 behaviors needs to be empirically tested, ideally in rigorously designed prospective studies. Given the rise of  
47 patient-centered health care,<sup>40,41</sup> understanding patients’ motivations and perspectives has never been more  
48 important. The current health education paradigm holds that improving patients’ knowledge of symptoms and  
49 signs will result in more timely help-seeking behavior.<sup>38,42-44</sup> Each year thousands of individuals suffer needlessly  
50  
51  
52  
53  
54  
55  
56  
57  
58  
59  
60

1 and many die because of extended delays in seeking professional aid for acute medical conditions (e.g.,  
2 myocardial infarctions, strokes, diabetic emergencies, cancer complications and pain, and acute exacerbations of  
3 congestive heart failure).<sup>45-52</sup> Numerous studies have been conducted to attempt to elucidate the reasons behind  
4 patient delays,<sup>46-51,53</sup> with the ultimate goal of designing education programs and interventions that will result in  
5 timely help-seeking. Significant risk factors for help-seeking reluctance have been identified (e.g. Black race<sup>52,54,55</sup>)  
6 but much of the variation remains unexplained and we still lack a complete understanding of *why* certain patients  
7 and not others delay seeking aid.  
8

9  
10  
11 A distinction of our theory is movement of the focus of inquiry away from the disease and the patient's  
12 relationship to the disease (e.g. health knowledge, symptom awareness, ability to comply with self-care regimens)  
13 and onto *patients' sense of self* – their self-concepts and self-identity.<sup>56</sup> We hypothesize that illness behaviors may  
14 become “noncompliant” or “irrational” or “self-harming” when specific courses of action would create an internal  
15 conflict with patients' ideas of *who they are*. Specifically, we posit that people who strongly believe that they  
16 should manage their problems on their own, not show emotions, and not complain about physical discomfort will  
17 experience an internal cognitive conflict when faced with a situation that could require help from others. This  
18 internal conflict will lead to delays in or avoidance of help-seeking, with potentially life-threatening consequences.  
19 For example, empirical studies of increasing rates of male suicide in rural Australia have identified hegemonic  
20 masculine norms of stoicism as an important causal factor in the context of severe economic stress.<sup>57,58</sup>  
21 Understanding the influences of race, ethnicity, socioeconomic status, religion, and other cultural factors on stoic  
22 ideologies may help explain past research findings on delays in help-seeking. Finally, there may also be positive  
23 health consequences of stoic ideologies for individuals,<sup>15</sup> which careful prospective research could confirm.  
24  
25  
26  
27  
28  
29  
30  
31  
32  
33  
34  
35  
36  
37  
38  
39  
40  
41  
42  
43  
44  
45  
46  
47  
48  
49  
50  
51  
52  
53  
54  
55  
56  
57  
58  
59  
60

1  
2  
3  
4  
5  
6  
7  
8  
9  
10  
11  
12  
13  
14  
15  
16  
17  
18  
19  
20  
21  
22  
23  
24  
25  
26  
27  
28  
29  
30  
31  
32  
33  
34  
35  
36  
37  
38  
39  
40  
41  
42  
43  
44  
45  
46  
47  
48  
49  
50  
51  
52  
53  
54  
55  
56  
57  
58  
59  
60

## FIGURE LEGENDS

Figure 1. Content Validity of the Pathak-Wieten Stoicism Ideology Scale: Mean Scores by Response to the Statement “I try to be a stoic”

Figure 2. Pathak-Wieten Stoicism Ideology Scale: Distribution of Domain Scores

Figure 3. Pathak-Wieten Stoicism Ideology Scale: Distribution of Overall Scores by Gender

**Table 1. Liverpool Stoicism Scale<sup>23</sup>**

| Item # | Item                                                                        | Closest Domain from the Pathak-Wieten Stoicism Ideology Scale |
|--------|-----------------------------------------------------------------------------|---------------------------------------------------------------|
| 1      | I tend to cry at sad films                                                  | Stoic Taciturnity                                             |
| 2      | I sometimes cry in public                                                   | Stoic Taciturnity                                             |
| 3      | I do not let my problems interfere with my everyday life                    | Stoic Taciturnity                                             |
| 4      | I tend not to express my emotions                                           | Stoic Taciturnity                                             |
| 5      | I like someone to hold me when I am upset                                   | Stoic Taciturnity                                             |
| 6      | I do not get emotionally involved when I see suffering on television        | Stoic Serenity                                                |
| 7      | I would consider going to a counsellor if I had a problem                   | Stoic Taciturnity                                             |
| 8      | I tend to keep my feelings to myself                                        | Stoic Taciturnity                                             |
| 9      | I would not mind sharing my problems with a male friend                     | Stoic Taciturnity                                             |
| 10     | It makes me uncomfortable when people express their emotions in front of me | None                                                          |
| 11     | I don't really like people to know what I am feeling                        | Stoic Taciturnity                                             |
| 12     | I rely heavily on my friends for emotional support                          | Stoic Taciturnity                                             |
| 13     | I always take time out to discuss my problems with my family                | Stoic Taciturnity                                             |
| 14     | One should keep a “stiff upper lip”                                         | Stoic Serenity                                                |
| 15     | I believe that it is healthy to express one's emotions                      | Stoic Taciturnity                                             |
| 16     | Getting upset over the death of a loved one does not help                   | Stoic Death Indifference                                      |
| 17     | I would not mind sharing my problems with a female friend                   | Stoic Taciturnity                                             |
| 18     | A problem shared is a problem halved                                        | Stoic Taciturnity                                             |
| 19     | I would not cry at the funeral of a close friend or relative                | Stoic Taciturnity                                             |
| 20     | Expressing one's emotions is a sign of weakness                             | Stoic Taciturnity                                             |

Table 2. Characteristics of the Study Population (n=390)

|                           | Number | Percent |
|---------------------------|--------|---------|
| <b>Age</b>                |        |         |
| 18 – 24 years             | 303    | 77.7    |
| 25 + years                | 87     | 22.3    |
|                           |        |         |
| <b>Gender</b>             |        |         |
| Female                    | 221    | 56.7    |
| Male                      | 169    | 43.3    |
|                           |        |         |
| <b>Race and Ethnicity</b> |        |         |
| White                     | 215    | 55.1    |
| Black                     | 55     | 14.1    |
| Hispanic                  | 59     | 15.1    |
| Asian                     | 36     | 9.2     |
| Biracial/Other            | 25     | 6.4     |
|                           |        |         |
| <b>Nativity</b>           |        |         |
| USA (inc. Puerto Rico)    | 315    | 80.8    |
| Other                     | 75     | 19.2    |
|                           |        |         |

**Table 3. Pathak-Wieten Stoicism Ideology Scale (PW-SIS)**

Please read each statement and choose the answer that best reflects your own views.

| <input type="checkbox"/> Disagree                                                   | <input type="checkbox"/> Somewhat Disagree | <input type="checkbox"/> Not Sure | <input type="checkbox"/> Somewhat Agree | <input type="checkbox"/> Agree |
|-------------------------------------------------------------------------------------|--------------------------------------------|-----------------------------------|-----------------------------------------|--------------------------------|
| Item                                                                                | Domain                                     | Original Item #*                  |                                         |                                |
| 1. I expect myself to hide my aches and pains from others.                          | Stoic Endurance                            | Q2                                |                                         |                                |
| 2. I don't believe in talking about my personal problems.                           | Stoic Taciturnity                          | Q3                                |                                         |                                |
| 3. I expect myself to manage my physical discomfort without complaining.            | Stoic Endurance                            | Q5                                |                                         |                                |
| 4. I believe I should experience strong emotions. <i>[reverse code]</i>             | Stoic Serenity                             | Q8                                |                                         |                                |
| 5. When the time for my death comes, I believe I should accept it without fear.     | Stoic Death Indifference                   | Q12                               |                                         |                                |
| 6. I expect myself to hide my strong emotions from others.                          | Stoic Taciturnity                          | Q13                               |                                         |                                |
| 7. I would prefer to be unemotional.                                                | Stoic Serenity                             | Q14                               |                                         |                                |
| 8. I expect myself to manage my own problems without help from anyone.              | Stoic Taciturnity                          | Q15                               |                                         |                                |
| 9. I believe my physical pain is best handled by just keeping quiet about it.       | Stoic Endurance                            | Q17                               |                                         |                                |
| 10. I would be very upset if I knew my death was coming soon. <i>[reverse code]</i> | Stoic Death Indifference                   | Q18                               |                                         |                                |
| 11. I expect myself to avoid feeling intense emotions.                              | Stoic Serenity                             | Q20                               |                                         |                                |
| 12. I would not allow myself to be bothered by the fear of death.                   | Stoic Death Indifference                   | Q24                               |                                         |                                |

See Methods for scoring instructions

\* See Table S1 in the Technical Supplement, available online.

Table 4. Conceptual Domains of the Pathak-Wieten Stoicism Ideology Scale

| Domain                                                                                                                | Mean Score (95% CI)       | Cronbach's $\alpha$ | Correlation with ST Score | Correlation with SE Score | Correlation with SS Score | Correlation with SDI Score |
|-----------------------------------------------------------------------------------------------------------------------|---------------------------|---------------------|---------------------------|---------------------------|---------------------------|----------------------------|
| <b>Stoic Taciturnity (ST):</b><br>The belief that one should conceal one's problems and emotions from others (Modern) | -0.08<br>(-0.18 to +0.02) | 0.71                | 1.00                      | 0.59<br>$p < 0.0001$      | 0.53<br>$p < 0.0001$      | 0.09<br>$p = 0.0729$       |
| <b>Stoic Endurance (SE):</b><br>The belief that one should endure physical suffering without complaining (Modern)     | +0.04<br>(-0.06 to +0.13) | 0.65                | 0.59<br>$p < 0.0001$      | 1.00                      | 0.35<br>$p < 0.0001$      | 0.18<br>$p = 0.0005$       |
| <b>Stoic Serenity (SS):</b><br>The belief that one should refrain from experiencing strong emotions (Classical)       | -0.66<br>(-0.75 to -0.56) | 0.64                | 0.53<br>$p < 0.0001$      | 0.35<br>$p < 0.0001$      | 1.00                      | 0.15<br>$p = 0.0031$       |
| <b>Stoic Death Indifference (SDI):</b><br>The belief that one should not fear or avoid death (Classical)              | +0.08<br>(-0.03 to +0.18) | 0.69                | 0.09<br>$p = 0.0729$      | 0.18<br>$p = 0.0005$      | 0.15<br>$p = 0.0031$      | 1.00                       |
| <b>Stoicism Ideology Scale (PW-SIS)</b>                                                                               | -0.16<br>(-0.22 to -0.09) | 0.78                | 0.79<br>$p < 0.0001$      | 0.74<br>$p < 0.0001$      | 0.72<br>$p < 0.0001$      | 0.53<br>$p < 0.0001$       |

Table 5. Sociodemographic Predictors of a Mean PW-SIS Score in the Top Quartile (&gt; 0.167)

|                        | Odds Ratio (95% CI) | p value |
|------------------------|---------------------|---------|
| <b>Age 18-24 years</b> | 1.00 (referent)     |         |
| <b>Age 25-73 years</b> | 1.34 (0.76 - 2.35)  | n.s.    |
| <b>Men</b>             | 2.30 (1.44 - 3.68)  | < 0.001 |
| <b>Women</b>           | 1.00 (referent)     |         |
| <b>Asian</b>           | 0.93 (0.38 - 2.25)  | n.s.    |
| <b>Black</b>           | 1.55 (0.78 - 3.09)  | n.s.    |
| <b>Biracial/Other</b>  | 1.70 (0.66 - 4.34)  | n.s.    |
| <b>Hispanic</b>        | 1.88 (0.99 - 3.56)  | n.s.    |
| <b>Whites</b>          | 1.00 (referent)     |         |
| <b>Born in the USA</b> | 1.97 (1.01 - 3.84)  | 0.048   |
| <b>Born elsewhere</b>  | 1.00 (referent)     |         |

## REFERENCES

1. Epictetus. *Enchiridion*. Long G, trans: Dover Publications; 2004.
2. Aurelius M. *Meditations*. Long G, trans: Dover Publications; 1997.
3. Baltzly D. Stoicism. In: Zalta EN, ed. *The Stanford Encyclopedia of Philosophy*. Winter 2010 Edition ed. Palo Alto CA: Stanford University; 2010.
4. Gowans CW. Medical analogies in Buddhist and Hellenistic thought: tranquility and anger. *Royal Institute of Philosophy Supplement*. 2010;66:11-33.
5. Wong DB. The meaning of detachment in Daoism, Buddhism, and Stoicism. *Dao: A Journal of Comparative Philosophy*. 2006;5(2):207-219.
6. Becker LC. Human health and stoic moral norms. *J Med Philos*. 2003;28(2):221-238.
7. Stempsey WE. A new stoic: the wise patient. *Med Philos*. 2004;29(4):451-472.
8. Moore A, Grime J, Campbell P, Richardson J. Troubling stoicism: Sociocultural influences and applications to health and illness behaviour. *Health* 2013;17(2):159-173.
9. Sargent C. Between death and shame: dimensions of pain in Bariba culture. *Soc Sci Med*. 1984;19(12):1299-1304.
10. Latimer M, Finley GA, Rudderham S, et al. Expression of pain among Mi'kmaq children in one Atlantic Canadian community: a qualitative study. *CMAJ Open*. 2014;2(3):e133-3138.
11. Te Karu L, Bryant L, Elley CR. Maori experiences and perceptions of gout and its treatment: a kaupapa Maori qualitative study. *J Prim Health Care*. 2013;5(3):214-222.
12. Caldwell JC, Orubuloye IO, Caldwell P. Underreaction to AIDS in Sub-Saharan Africa. *Soc Sci Med*. 1992;34(11):1169-1182.
13. Jarrett T. Warrior Resilience Training in Operation Iraqi Freedom: combining rational emotive behavior therapy, resiliency, and positive psychology. *US Army Med Dep J*. 2008 (Jul-Sep):32-38.
14. Jarrett TA. Warrior Resilience and Thriving (WRT): Rational Emotive Behavior Therapy (REBT) as a Resiliency and Thriving Foundation to Prepare Warriors and Their Families for Combat Deployment and Posttraumatic Growth in Operation Iraqi Freedom, 2005–2009. *J Rat-Emo Cognitive-Behav Ther* 2013;31.
15. Hutnick N, Smith P, Koch T. What does it feel like to be 100? Socio-emotional aspects of well-being in the stories of 16 centenarians living in the United Kingdom. *Aging & mental health*. 2012;16(7):811-818.
16. Waitzkin H, Britt T, Williams C. Narratives of aging and social problems in medical encounters with older persons. *J Health Soc Behav*. 1994;35(4):322-348.
17. Smiler AP. Thirty years after the discovery of gender: psychological concepts and measures of masculinity. *Sex Roles*. 2004;50(1):15-26.
18. Smiler AP. Conforming to masculine norms: evidence for validity among adult men and women? *Sex Roles*. 2006;54(767-775).
19. Mahalik JR, Locke BD, Ludlow LH, et al. Development of the Conformity to Masculine Norms Inventory. *Psychology of Men & Masculinity*. 2003;4(1):3-25.
20. Yong HH. Can attitudes of stoicism and cautiousness explain observed age-related variation in levels of self-rated pain, mood disturbance and functional interference in chronic pain patients? *Eur J Pain*. 2006;10(5):399-407.
21. Yong HH, Bell R, Workman B, Gibson SJ. Psychometric properties of the Pain Attitudes Questionnaire (revised) in adult patients with chronic pain. *Pain*. 2003;104(3):673-681.
22. Yong HH, Gibson SJ, Horne DJ, Helme RD. Development of a pain attitudes questionnaire to assess stoicism and cautiousness for possible age differences. *J Gerontol B Psychol Sci Soc Sci*. 2001;56(5):279-284.
23. Wagstaff G, Rowledge A. Stoicism: Its relation to gender, attitude toward poverty, and reactions to emotive material. *Journal of Social Psychology*. 1995;135:181-184.
24. Gaitniece-Putāne A. Liverpool Stoicism Scale Adaptation. *Baltic Journal of Psychology*. 2005;6(1):57-64.

- 1 25. Smith AR, Yeager AE, Dodd DR. The joint influence of acquired capability for suicide and  
2 stoicism on over-exercise among women. *Eating Behaviors*. 2015;17:77-82.
- 3 26. Whealin JM, Kuhn E, Pietrzak RH. Applying behavior change theory to technology promoting  
4 veteran mental health care seeking. *Psychological Services*. 2014;11(4):486-494.
- 5 27. Witte TK, Gordon KH, Smith PN, Van Orden KA. Stoicism and sensation seeking: male  
6 vulnerabilities for the acquired capability for suicide. *Journal of Research in Personality*.  
7 2012;46(4):384-392.
- 8 28. Charmaz K. Loss of self: a fundamental form of suffering in the chronically ill. *Sociology of Health  
9 and Illness*. 1983;5(2):168-195.
- 10 29. Hammond WP, Matthews D, Mohottige D, Agyemang A, Corbie-Smith G. Masculinity, medical  
11 mistrust, and preventive health services delays among community-dwelling African-American  
12 men. *Journal of general internal medicine*. 2010;25(12):1300-1308.
- 13 30. Levant RF, Rankin TJ, Williams CM, Hasan NT, Smalley KB. Evaluation of the factor structure  
14 and construct validity of scores on the Male Role Norms Inventory—Revised (MRNI-R).  
15 *Psychology of Men & Masculinity*. 2010;11(1):25-37.
- 16 31. Wheldon CW, Pathak EB. Masculinity and Relationship Agreements among Male Same-Sex  
17 Couples. *Journal of Sex Research*. 2010;47(5):460-470.
- 18 32. Devon HA, Block ME, Moyle-Wright P, et al. A Psychometric Toolbox for Testing Validity and  
19 Reliability. *Journal of Nursing Scholarship*. 2007;39(2):155-164.
- 20 33. Fabringer LR, Wegener DT, MacCallum RC, Straham EJ. Evaluating the Use of Exploratory  
21 Factor Analysis in Psychological Research. *Psychological Methods*. 1999;4(3):272-299.
- 22 34. Brotherton R, French CC, Pickering AD. Measuring belief in conspiracy theories: the generic  
23 conspiracist beliefs scale. *Frontiers in psychology*. 2013;4.
- 24 35. de Nooijer J, Puijk-Hekman S, van Assema P. The compensatory health beliefs scale:  
25 psychometric properties of a cross-culturally adapted scale for use in The Netherlands. *Health  
26 education research*. 2009;24(5):811-817.
- 27 36. Downey L, Curtis JR, Lafferty WE, Herting JR, Engelberg RA. The Quality of Dying and Death  
28 Questionnaire (QODD): empirical domains and theoretical perspectives. *Journal of pain and  
29 symptom management*. 2010;39(1):9-22.
- 30 37. Tabachnick BG, Fidell LS. *Using Multivariate Statistics*. Boston: Allyn and Bacon; 2001.
- 31 38. Glanz K, Rimer BK, Viswanath K, eds. *Health Behavior: Theory, Research, and Practice (Fifth  
32 Edition)*. San Francisco: Jossey-Bass; 2015.
- 33 39. Almberg B, Grafstrom M, Winblad B. Major strain and coping strategies as reported by family  
34 members who care for aged demented relatives. *J Adv Nurs*. 1997;26(4):683-691.
- 35 40. Clark AM, Savard LA, Spaling MA, Heath S, Duncan A, Spiers JA. Understanding help-seeking  
36 decisions in people with heart failure: a qualitative systematic review. *International journal of  
37 nursing studies*. 2012;49(12):1582-1597.
- 38 41. Moloczij N, McPherson KM, Smith JF, Kayes NM. Help-seeking at the time of stroke: stroke  
39 survivors' perspectives on their decisions. *Health & social care in the community*. 2008;16(5):501-  
40 510.
- 41 42. Caldwell MA, Miaskowski C. Mass media interventions to reduce help-seeking delay in people  
42 with symptoms of acute myocardial infarction: time for a new approach? *Patient Educ Couns*.  
43 2002;46(1):1-9.
- 44 43. Lecouturier J, Rodgers H, Murtagh MJ, White M, Ford GA, Thomson RG. Systematic review of  
45 mass media interventions designed to improve public recognition of stroke symptoms, emergency  
46 response and early treatment. *BMC public health*. 2010;10.
- 47 44. Luca NR, Suggs LS. Theory and model use in social marketing health interventions. *Journal of  
48 health communication*. 2013;18(1):20-40.
- 49 45. Go AS, Mozaffarian D, Roger VL, et al. Heart disease and stroke statistics - 2014 update: a report  
50 from the American Heart Association. *Circulation*. 2014;129(3):e28-e292.
- 51 46. Zock E, Kerkhoff H, Kleyweg RP, van de Beek D. Intrinsic factors influencing help-seeking  
52 behavior in an acute stroke situation. *Acta neurologica Belgica*. 2016;116(3):295-301.
- 53  
54  
55  
56  
57  
58  
59  
60



- 1  
2 47. Mackintosh JE, Murtagh MJ, Rodgers H, Thomson RG, Ford GA, White M. Why people do, or do  
3 not, immediately contact emergency medical services following the onset of acute stroke:  
4 qualitative interview study. *PLOS One*. 2012;7(10).
- 5 48. Davis LL, Mishe IM, Moser DK, Esposito N, Lynn MR, Schwartz TA. Thoughts and behaviors of  
6 women with symptoms of acute coronary syndrome. *Heart & lung : the journal of critical care*.  
7 2013;42(6):428-435.
- 8 49. Galdas PM, Johnson JL, Percy ME, Ratner PA. Help seeking for cardiac symptoms: beyond the  
9 masculine-feminine binary. *Soc Sci Med*. 2010;71(1):18-24.
- 10 50. Whitaker KL, Macleod U, Winstanley K, Scott SE, Wardie J. Help seeking for cancer 'alarm'  
11 symptoms: a qualitative interview study of primary care patients in the UK. *Br J Gen Pract*.  
12 2015;65(631):e96-e105.
- 13 51. Yousaf O, Grunfeld EA, Hunter MS. A systematic review of the factors associated with delays in  
14 medical and psychological help-seeking among men. *Health Psychol Rev*. 2015;9(2):264-276.
- 15 52. Powell W, Adams LB, Cole-Lewis Y, Agyemang A, Upton RD. Masculinity and race-related  
16 factors as barriers to help-seeking among African American men. *Behav Med*. 2016;42(3):150-  
17 163.
- 18 53. Nymark C, Mattiasson AC, Henriksson P, Kiessling A. The turning point: from self-regulative  
19 illness behaviour to care-seeking in patients with an acute myocardial infarction. *Journal of*  
20 *clinical nursing*. 2009;18(23):3358-3365.
- 21 54. Lee H, Bahler R, Chung C, Alonzo A, Zeller RA. Prehospital delay with myocardial infarction: the  
22 interactive effect of clinical symptoms and race. *Applied nursing research : ANR*. 2000;13(3):125-  
23 133.
- 24 55. Evangelista LS, Dracup K, Doering LV. Racial differences in treatment-seeking delays among  
25 heart failure patients. *Journal of cardiac failure*. 2002;8(6):381-386.
- 26 56. Baumeister RF. Self and identity: a brief overview of what they are, what they do, and how they  
27 work. *Annals of the New York Academy of Sciences*. 2011;1234:48-55.
- 28 57. Alston M. Rural male suicide in Australia. *Soc Sci Med*. 2012;74(4):515-522.
- 29 58. Alston M, Kent J. The big dry: the link between rural masculinities and poor health outcomes for  
30 farming men. *Journal of Sociology*. 2008;44(2):133-147.
- 31  
32  
33  
34  
35  
36  
37  
38  
39  
40  
41  
42  
43  
44  
45  
46  
47  
48  
49  
50  
51  
52  
53  
54  
55  
56  
57  
58  
59  
60

1  
2  
3  
4  
5  
6  
7  
8  
9  
10  
11  
12  
13  
14  
15  
16  
17  
18  
19  
20  
21  
22  
23  
24  
25  
26  
27  
28  
29  
30  
31  
32  
33  
34  
35  
36  
37  
38  
39  
40  
41  
42  
43  
44  
45  
46  
47  
48  
49  
50  
51  
52  
53  
54  
55  
56  
57  
58  
59  
60

**Figure 1.**  
**Content Validity of the Pathak-Wieten Stoicism Ideology Scale:**  
**Mean Scores by Response to the Statement “I try to be a stoic”**

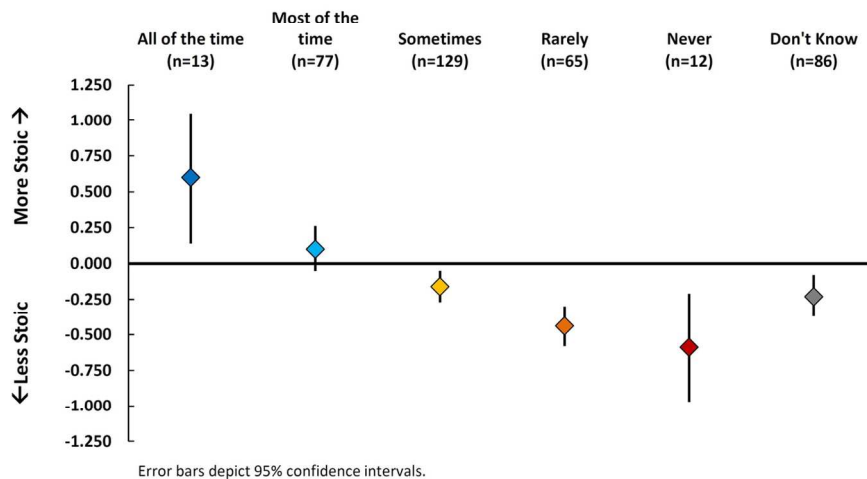

Figure 1. Content Validity of the Pathak-Wieten Stoicism Ideology Scale: Mean Scores by Response to the Statement “I try to be a stoic”

130x87mm (300 x 300 DPI)

1  
2  
3  
4  
5  
6  
7  
8  
9  
10  
11  
12  
13  
14  
15  
16  
17  
18  
19  
20  
21  
22  
23  
24  
25  
26  
27  
28  
29  
30  
31  
32  
33  
34  
35  
36  
37  
38  
39  
40  
41  
42  
43  
44  
45  
46  
47  
48  
49  
50  
51  
52  
53  
54  
55  
56  
57  
58  
59  
60

**Figure 2.**  
**Pathak-Wieten Stoicism Ideology Scale: Distribution of Domain Scores**

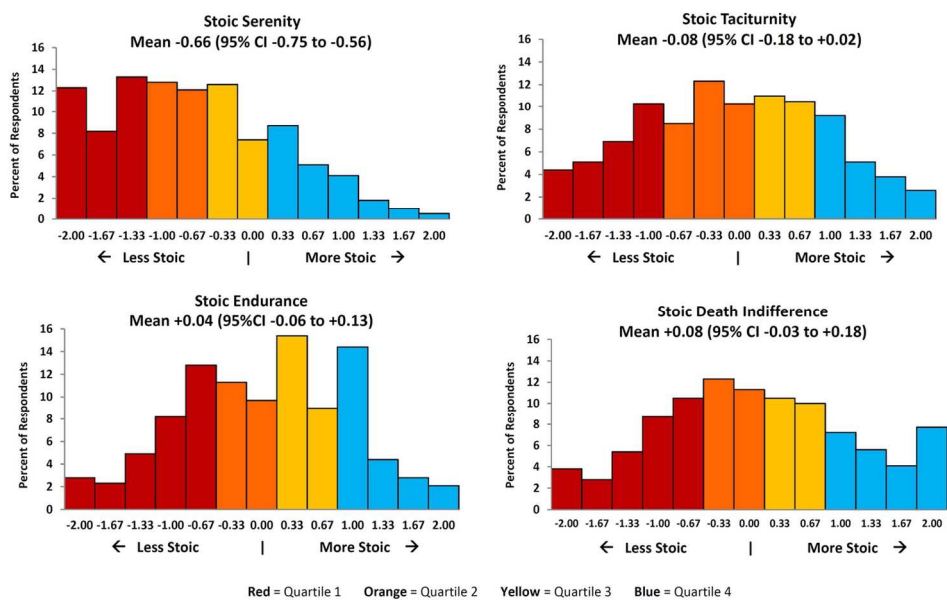

Figure 2. Pathak-Wieten Stoicism Ideology Scale: Distribution of Domain Scores

139x100mm (300 x 300 DPI)

1  
2  
3  
4  
5  
6  
7  
8  
9  
10  
11  
12  
13  
14  
15  
16  
17  
18  
19  
20  
21  
22  
23  
24  
25  
26  
27  
28  
29  
30  
31  
32  
33  
34  
35  
36  
37  
38  
39  
40  
41  
42  
43  
44  
45  
46  
47  
48  
49  
50  
51  
52  
53  
54  
55  
56  
57  
58  
59  
60

**Figure 3.**  
**Pathak-Wieten Stoicism Ideology Scale: Distribution of Overall Scores by Gender**

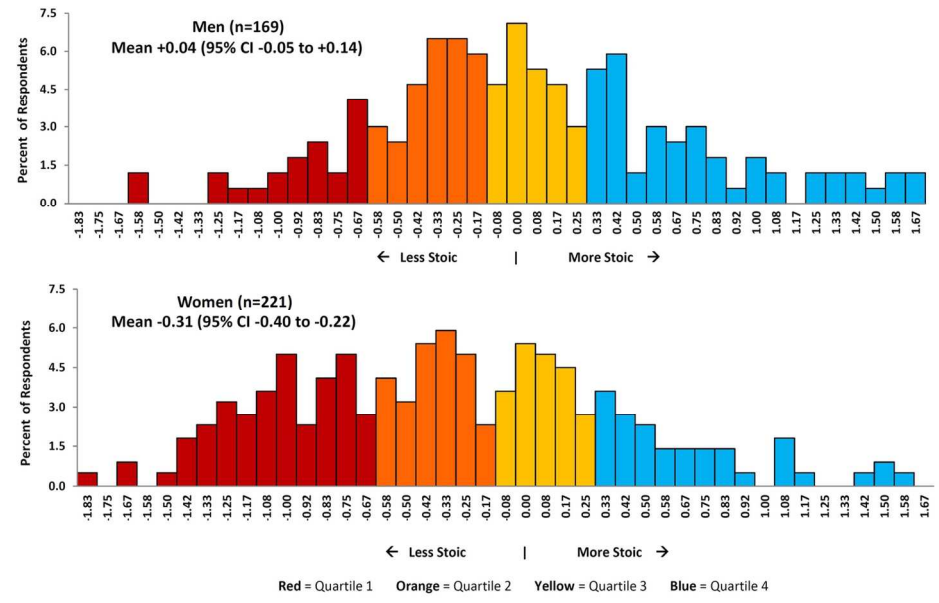

Figure 3. Pathak-Wieten Stoicism Ideology Scale: Distribution of Overall Scores by Gender

142x104mm (300 x 300 DPI)

## Pathak Stoicism Paper

### Technical Supplement

Scale items under each of the 5 domains along with response frequencies for the preliminary 24-item PW-SIS are shown in Table S1. The results of the assessment of redundancy and content validity (Step 1) are shown in Table S2. We dropped 2 items (Q1 and Q4) because they were highly correlated with other items. The entire Stoic Composure domain, with 4 questions, was dropped after consideration of content validity. At every level of response to the statement “I try to be a stoic,” from “never” to all “all the time,” responses to the 4 Stoic Composure items were highly pro-stoic. Furthermore, the overall response distributions for 3 of the 4 items (Q10, Q21, and Q22) were highly skewed, with only 7%, 4%, and 3% disagreeing with these statements (Table S1). There were no other items in the scale that resulted in such highly skewed response distributions. We concluded that this domain was referencing a strongly sanctioned social norm, and that while the items were not explicitly worded as aphorisms, they might be functioning in the same way. Some respondents may have been inhibited to admit that they did not believe that they should stay cool in an emergency, if they perceived that a strong socio-cultural norm existed. Interestingly, the only reverse-coded item under this domain, Q16: “I believe it’s okay to let myself get upset and distracted in a major crisis,” elicited a less skewed response, although the majority of respondents still disagreed with this statement. Given that there was only a single item which performed marginally well, we decided to drop the entire domain.

Confirmatory factor analysis of the reduced 18-item, 4-domain PW-SIS resulted in strong factor loadings for 16 of the 18 items (Table S2), and decent model fit statistics (Table S3). Both items which were dropped (Q23 and Q6) were reverse-code items. Removal of these 2 items resulted in slightly improved model fit statistics (Table S3) when the CFA was re-run on the remaining 16 items.

As shown in Table S2, the 16-item scale retained 6 items for Stoic Taciturnity, 4 items for Stoic Endurance, 3 items for Stoic Serenity, and 3 items for Stoic Death Indifference. In the interest of parsimony, we decided to remove an additional 4 items, so that the final scale would retain 3 items for each of the 4 domains. We dropped 3 items from Stoic Taciturnity (Q7, Q9, and Q19), and 1 item from Stoic Endurance (Q11) - all with the lowest

1  
2  
3  
4  
5  
6  
7  
8  
9  
10  
11  
12  
13  
14  
15  
16  
17  
18  
19  
20  
21  
22  
23  
24  
25  
26  
27  
28  
29  
30  
31  
32  
33  
34  
35  
36  
37  
38  
39  
40  
41  
42  
43  
44  
45  
46  
47  
48  
49  
50  
51  
52  
53  
54  
55  
56  
57  
58  
59  
60

factor loadings, and all reverse-code items. Factor loadings for the remaining 12 items changed little in the final CFA model (Table S2), but model fit statistics improved so that the final RMSEA = 0.05 (95% CI 0.04-0.07), Goodness-of-Fit Index = 0.96, and Tucker-Lewis Index = 0.93.

For peer review only

1  
2  
3  
4  
5  
6  
7  
8  
9  
10  
11  
12  
13  
14  
15  
16  
17  
18  
19  
20  
21  
22  
23  
24  
25  
26  
27  
28  
29  
30  
31  
32  
33  
34  
35  
36  
37  
38  
39  
40  
41  
42  
43  
44  
45  
46  
47  
48  
49

| Original Item #                                                                                               | Core Meaning / Scale Items                                                                           | Disagree (-2) | Somewhat Disagree (-1) | Not sure (0) | Somewhat Agree (+1) | Agree (+2) |
|---------------------------------------------------------------------------------------------------------------|------------------------------------------------------------------------------------------------------|---------------|------------------------|--------------|---------------------|------------|
| <b>Stoic Taciturnity: The belief that one should conceal one's problems and emotions from others (Modern)</b> |                                                                                                      |               |                        |              |                     |            |
| Q1                                                                                                            | I prefer to keep my intense feelings to myself.                                                      | 10%           | 17%                    | 6%           | 40%                 | 27%        |
| Q3                                                                                                            | I don't believe in talking about my personal problems.                                               | 23%           | 31%                    | 14%          | 26%                 | 6%         |
| Q7                                                                                                            | I believe it's fine if I cry openly in front of other people. <i>(reverse)</i>                       | 31%           | 28%                    | 12%          | 18%                 | 11%        |
| Q9                                                                                                            | I believe in discussing my personal problems with family and friends. <i>(reverse)</i>               | 3%            | 12%                    | 14%          | 37%                 | 33%        |
| Q13                                                                                                           | I expect myself to hide my strong emotions from others.                                              | 13%           | 23%                    | 19%          | 32%                 | 13%        |
| Q15                                                                                                           | I expect myself to manage my own problems without help from anyone.                                  | 16%           | 24%                    | 13%          | 34%                 | 13%        |
| Q19                                                                                                           | If my emotions get very intense, I believe it's all right to just show them openly. <i>(reverse)</i> | 16%           | 25%                    | 23%          | 27%                 | 8%         |
| <b>Stoic Endurance: The belief that one should endure physical suffering without complaining (Modern)</b>     |                                                                                                      |               |                        |              |                     |            |
| Q2                                                                                                            | I expect myself to hide my aches and pains from others.                                              | 8%            | 24%                    | 12%          | 41%                 | 15%        |
| Q4                                                                                                            | I don't believe in bothering people close to me with my aches and pains.                             | 20%           | 27%                    | 14%          | 27%                 | 12%        |
| Q5                                                                                                            | I expect myself to manage my physical discomfort without complaining.                                | 9%            | 18%                    | 14%          | 44%                 | 16%        |
| Q11                                                                                                           | If I am suffering, I believe in telling someone about my physical pain. <i>(reverse)</i>             | 5%            | 9%                     | 16%          | 37%                 | 33%        |
| Q17                                                                                                           | I believe my physical pain is best handled by just keeping quiet about it.                           | 29%           | 29%                    | 22%          | 15%                 | 5%         |
| Q23                                                                                                           | I believe in letting myself complain about everyday aches and pains. <i>(reverse)</i>                | 39%           | 32%                    | 16%          | 11%                 | 3%         |
| <b>Stoic Composure: The belief that one should control one's emotions and behavior under stress (Modern)</b>  |                                                                                                      |               |                        |              |                     |            |
| Q10                                                                                                           | I expect myself to remain calm and decisive in an emergency.                                         | 2%            | 5%                     | 11%          | 29%                 | 54%        |
| Q16                                                                                                           | I believe it's okay to let myself get upset and distracted in a major crisis. <i>(reverse)</i>       | 29%           | 25%                    | 19%          | 19%                 | 7%         |
| Q21                                                                                                           | I believe I should be calm and level-headed.                                                         | 2%            | 2%                     | 5%           | 35%                 | 56%        |
| Q22                                                                                                           | I believe I should stay cool and steady when the pressure is high and the situation is tense.        | 1%            | 2%                     | 8%           | 36%                 | 54%        |
| <b>Stoic Serenity: The belief that one should refrain from experiencing strong emotions (Classical)</b>       |                                                                                                      |               |                        |              |                     |            |
| Q8                                                                                                            | I believe I should experience strong emotions. <i>(reverse)</i>                                      | 4%            | 8%                     | 21%          | 33%                 | 34%        |
| Q14                                                                                                           | I would prefer to be unemotional.                                                                    | 37%           | 20%                    | 17%          | 14%                 | 11%        |
| Q20                                                                                                           | I expect myself to avoid feeling intense emotions.                                                   | 25%           | 31%                    | 19%          | 19%                 | 5%         |
| <b>Stoic Death Indifference: The belief that one should not fear or avoid death (Classical)</b>               |                                                                                                      |               |                        |              |                     |            |
| Q6                                                                                                            | I believe it's okay if I worry about dying too soon. <i>(reverse)</i>                                | 25%           | 16%                    | 24%          | 19%                 | 17%        |
| Q12                                                                                                           | When the time for my death comes, I believe I should accept it without fear.                         | 8%            | 12%                    | 20%          | 21%                 | 39%        |
| Q18                                                                                                           | I would be very upset if I knew my death was coming soon. <i>(reverse)</i>                           | 13%           | 6%                     | 22%          | 21%                 | 39%        |
| Q24                                                                                                           | I would not allow myself to be bothered by the fear of death.                                        | 14%           | 19%                    | 26%          | 17%                 | 24%        |

Table S2. **Confirmatory Factor Analysis and Item Reduction** (n=390)

| Item | Core Meaning / Scale Items                                                                           | Step 1:<br>Assessment of Redundancy<br>and Content Validity | Step 2:<br>CFA of 4-Domain,<br>18-Item Scale | Step 3:<br>CFA of 4-Domain,<br>16-Item Scale | Step 4:<br>CFA of 4-Domain,<br>12-Item Final Scale |
|------|------------------------------------------------------------------------------------------------------|-------------------------------------------------------------|----------------------------------------------|----------------------------------------------|----------------------------------------------------|
|      | <b>Stoic Taciturnity</b>                                                                             |                                                             | factor loadings                              | factor loadings                              | factor loadings                                    |
| Q1   | I prefer to keep my intense feelings to myself.                                                      | Redundant to Q13 (r = 0.54)                                 |                                              |                                              |                                                    |
| Q3   | I don't believe in talking about my personal problems.                                               |                                                             | 0.66                                         | 0.67                                         | 0.67                                               |
| Q7   | I believe it's fine if I cry openly in front of other people. <i>(reverse)</i>                       |                                                             | 0.46                                         | 0.46 <sup>a</sup>                            |                                                    |
| Q9   | I believe in discussing my personal problems with family and friends. <i>(reverse)</i>               |                                                             | 0.55                                         | 0.55 <sup>a</sup>                            |                                                    |
| Q13  | I expect myself to hide my strong emotions from others.                                              |                                                             | 0.75                                         | 0.75                                         | 0.73                                               |
| Q15  | I expect myself to manage my own problems without help from anyone.                                  |                                                             | 0.61                                         | 0.61                                         | 0.62                                               |
| Q19  | If my emotions get very intense, I believe it's all right to just show them openly. <i>(reverse)</i> |                                                             | 0.49                                         | 0.48 <sup>a</sup>                            |                                                    |
|      | <b>Stoic Endurance</b>                                                                               |                                                             |                                              |                                              |                                                    |
| Q2   | I expect myself to hide my aches and pains from others.                                              |                                                             | 0.65                                         | 0.65                                         | 0.68                                               |
| Q4   | I don't believe in bothering people close to me with my aches and pains.                             | Redundant to Q3 (r = 0.57)                                  |                                              |                                              |                                                    |
| Q5   | I expect myself to manage my physical discomfort without complaining.                                |                                                             | 0.57                                         | 0.56                                         | 0.55                                               |
| Q11  | If I am suffering, I believe in telling someone about my physical pain. <i>(reverse)</i>             |                                                             | 0.54                                         | 0.55 <sup>a</sup>                            |                                                    |
| Q17  | I believe my physical pain is best handled by just keeping quiet about it.                           |                                                             | 0.62                                         | 0.62                                         | 0.61                                               |
| Q23  | I believe in letting myself complain about everyday aches and pains. <i>(reverse)</i>                |                                                             | 0.26 <sup>b</sup>                            |                                              |                                                    |
|      | <b>Stoic Composure</b>                                                                               |                                                             |                                              |                                              |                                                    |
| Q10  | I expect myself to remain calm and decisive in an emergency.                                         | Domain excluded <sup>c</sup>                                |                                              |                                              |                                                    |
| Q16  | I believe it's okay to let myself get upset and distracted in a major crisis. <i>(reverse)</i>       | Domain excluded <sup>c</sup>                                |                                              |                                              |                                                    |
| Q21  | I believe I should be calm and level-headed.                                                         | Domain excluded <sup>c</sup>                                |                                              |                                              |                                                    |
| Q22  | I believe I should stay cool and steady when the pressure is high and the situation is tense.        | Domain excluded <sup>c</sup>                                |                                              |                                              |                                                    |
|      | <b>Stoic Serenity</b>                                                                                |                                                             |                                              |                                              |                                                    |
| Q8   | I believe I should experience strong emotions. <i>(reverse)</i>                                      |                                                             | 0.51                                         | 0.51                                         | 0.48                                               |
| Q14  | I would prefer to be unemotional.                                                                    |                                                             | 0.70                                         | 0.70                                         | 0.71                                               |
| Q20  | I expect myself to avoid feeling intense emotions.                                                   |                                                             | 0.62                                         | 0.62                                         | 0.63                                               |
|      | <b>Stoic Death Indifference</b>                                                                      |                                                             |                                              |                                              |                                                    |
| Q6   | I believe it's okay if I worry about dying too soon. <i>(reverse)</i>                                |                                                             | 0.27 <sup>b</sup>                            |                                              |                                                    |
| Q12  | When the time for my death comes, I believe I should accept it without fear.                         |                                                             | 0.61                                         | 0.62                                         | 0.63                                               |
| Q18  | I would be very upset if I knew my death was coming soon. <i>(reverse)</i>                           |                                                             | 0.57                                         | 0.57                                         | 0.57                                               |
| Q24  | I would not allow myself to be bothered by the fear of death.                                        |                                                             | 0.78                                         | 0.76                                         | 0.76                                               |

Footnotes: <sup>a</sup> = Excluded for parsimony; <sup>b</sup> = Excluded for poor factor loading; <sup>c</sup> = Excluded for poor content validity and highly skewed response distribution.



Table S3. Model Fit Statistics for Confirmatory Factor Analysis of the PW-SIS

| Model        | Description                                                                                                                                                                                                                                                                                          | Chi square      | df  | RMSEA (90% CI)         | Goodness-of-fit Index (GFI) | Adjusted GFI | Tucker-Lewis Index |
|--------------|------------------------------------------------------------------------------------------------------------------------------------------------------------------------------------------------------------------------------------------------------------------------------------------------------|-----------------|-----|------------------------|-----------------------------|--------------|--------------------|
|              | <b>Step 2:</b> After exclusion of 2 redundant items (q1 and q4) and 4 items from the Stoic Composure domain (q10, q16, q21, q22), confirmatory factor analysis (CFA) was performed on the 4-domain, 18-item PW-SIS.                                                                                  | 318<br>p <.0001 | 129 | 0.06<br>(0.05 to 0.07) | 0.91                        | 0.89         | 0.86               |
|              | <b>Step 3:</b> After exclusion of 2 items with poor factor loading (q6 and q23), CFA was performed on the 4-domain, 16-item PW-SIS.                                                                                                                                                                  | 264<br>p <.0001 | 98  | 0.07<br>(0.06 to 0.08) | 0.92                        | 0.89         | 0.89               |
| <b>Final</b> | <b>Step 4:</b> Factor loadings from Step 3 were examined, and for the purpose of parsimony, 4 additional items were excluded (q7, q9, q11, q19). Items with the strongest factor loadings in each domain were retained. The resulting 4-domain, 12-item PW-SIS has 3 items in each of the 4 domains. | 103<br>p <.0001 | 48  | 0.05<br>(0.04 to 0.07) | 0.96                        | 0.93         | 0.93               |

STROBE 2007 (v4) Statement—Checklist of items that should be included in reports of *cross-sectional studies*

| Section/Topic                | Item # | Recommendation                                                                                                                                                                       | Reported on page # |
|------------------------------|--------|--------------------------------------------------------------------------------------------------------------------------------------------------------------------------------------|--------------------|
| Title and abstract           | 1      | (a) Indicate the study's design with a commonly used term in the title or the abstract                                                                                               | 1                  |
|                              |        | (b) Provide in the abstract an informative and balanced summary of what was done and what was found                                                                                  | 2                  |
| <b>Introduction</b>          |        |                                                                                                                                                                                      |                    |
| Background/rationale         | 2      | Explain the scientific background and rationale for the investigation being reported                                                                                                 | 4-6                |
| Objectives                   | 3      | State specific objectives, including any prespecified hypotheses                                                                                                                     | 6                  |
| <b>Methods</b>               |        |                                                                                                                                                                                      |                    |
| Study design                 | 4      | Present key elements of study design early in the paper                                                                                                                              | 6-7                |
| Setting                      | 5      | Describe the setting, locations, and relevant dates, including periods of recruitment, exposure, follow-up, and data collection                                                      | 6-7                |
| Participants                 | 6      | (a) Give the eligibility criteria, and the sources and methods of selection of participants                                                                                          | 6-7                |
| Variables                    | 7      | Clearly define all outcomes, exposures, predictors, potential confounders, and effect modifiers. Give diagnostic criteria, if applicable                                             | 7-8                |
| Data sources/<br>measurement | 8*     | For each variable of interest, give sources of data and details of methods of assessment (measurement). Describe comparability of assessment methods if there is more than one group | 7-8                |
| Bias                         | 9      | Describe any efforts to address potential sources of bias                                                                                                                            | <i>n.a.</i>        |
| Study size                   | 10     | Explain how the study size was arrived at                                                                                                                                            | 6-7                |
| Quantitative variables       | 11     | Explain how quantitative variables were handled in the analyses. If applicable, describe which groupings were chosen and why                                                         | 7-8                |
| Statistical methods          | 12     | (a) Describe all statistical methods, including those used to control for confounding                                                                                                | 7-8                |
|                              |        | (b) Describe any methods used to examine subgroups and interactions                                                                                                                  | 7-9                |
|                              |        | (c) Explain how missing data were addressed                                                                                                                                          | <i>n.a.</i>        |
|                              |        | (d) If applicable, describe analytical methods taking account of sampling strategy                                                                                                   | 7-9                |
|                              |        | (e) Describe any sensitivity analyses                                                                                                                                                | <i>n.a.</i>        |
| <b>Results</b>               |        |                                                                                                                                                                                      |                    |

|                          |     |                                                                                                                                                                                                              |       |
|--------------------------|-----|--------------------------------------------------------------------------------------------------------------------------------------------------------------------------------------------------------------|-------|
| Participants             | 13* | (a) Report numbers of individuals at each stage of study—eg numbers potentially eligible, examined for eligibility, confirmed eligible, included in the study, completing follow-up, and analysed            | 6-9   |
|                          |     | (b) Give reasons for non-participation at each stage                                                                                                                                                         | n.a.  |
|                          |     | (c) Consider use of a flow diagram                                                                                                                                                                           | n.a.  |
| Descriptive data         | 14* | (a) Give characteristics of study participants (eg demographic, clinical, social) and information on exposures and potential confounders                                                                     | 8     |
|                          |     | (b) Indicate number of participants with missing data for each variable of interest                                                                                                                          | n.a.  |
| Outcome data             | 15* | Report numbers of outcome events or summary measures                                                                                                                                                         | 8-9   |
| Main results             | 16  | (a) Give unadjusted estimates and, if applicable, confounder-adjusted estimates and their precision (eg, 95% confidence interval). Make clear which confounders were adjusted for and why they were included | 8-9   |
|                          |     | (b) Report category boundaries when continuous variables were categorized                                                                                                                                    | 8-9   |
|                          |     | (c) If relevant, consider translating estimates of relative risk into absolute risk for a meaningful time period                                                                                             | 8-9   |
| Other analyses           | 17  | Report other analyses done—eg analyses of subgroups and interactions, and sensitivity analyses                                                                                                               | 8-9   |
| <b>Discussion</b>        |     |                                                                                                                                                                                                              |       |
| Key results              | 18  | Summarise key results with reference to study objectives                                                                                                                                                     | 10    |
| Limitations              | 19  | Discuss limitations of the study, taking into account sources of potential bias or imprecision. Discuss both direction and magnitude of any potential bias                                                   | 11-12 |
| Interpretation           | 20  | Give a cautious overall interpretation of results considering objectives, limitations, multiplicity of analyses, results from similar studies, and other relevant evidence                                   | 10-13 |
| Generalisability         | 21  | Discuss the generalisability (external validity) of the study results                                                                                                                                        | 11-13 |
| <b>Other information</b> |     |                                                                                                                                                                                                              |       |
| Funding                  | 22  | Give the source of funding and the role of the funders for the present study and, if applicable, for the original study on which the present article is based                                                | 1     |

\*Give information separately for cases and controls in case-control studies and, if applicable, for exposed and unexposed groups in cohort and cross-sectional studies.

**Note:** An Explanation and Elaboration article discusses each checklist item and gives methodological background and published examples of transparent reporting. The STROBE checklist is best used in conjunction with this article (freely available on the Web sites of PLoS Medicine at <http://www.plosmedicine.org/>, Annals of Internal Medicine at <http://www.annals.org/>, and Epidemiology at <http://www.epidem.com/>). Information on the STROBE Initiative is available at [www.strobe-statement.org](http://www.strobe-statement.org).

# BMJ Open

## Stoic Beliefs and Health: Development and Preliminary Validation of the Pathak-Wieten Stoicism Ideology Scale

|                                 |                                                                                                                                                                                                                                                                                        |
|---------------------------------|----------------------------------------------------------------------------------------------------------------------------------------------------------------------------------------------------------------------------------------------------------------------------------------|
| Journal:                        | <i>BMJ Open</i>                                                                                                                                                                                                                                                                        |
| Manuscript ID                   | bmjopen-2016-015137.R3                                                                                                                                                                                                                                                                 |
| Article Type:                   | Research                                                                                                                                                                                                                                                                               |
| Date Submitted by the Author:   | 15-Aug-2017                                                                                                                                                                                                                                                                            |
| Complete List of Authors:       | Pathak, Elizabeth; University of South Florida, Morsani College of Medicine<br>Wieten, Sarah; University of South Florida, Department of Philosophy and Morsani College of Medicine<br>Wheldon, Christopher W.; University of South Florida, Department of Community and Family Health |
| <b>Primary Subject Heading</b>: | Patient-centred medicine                                                                                                                                                                                                                                                               |
| Secondary Subject Heading:      | Epidemiology, Health services research, Research methods, Public health                                                                                                                                                                                                                |
| Keywords:                       | stoicism, help-seeking, health behavior theories, masculinity, patient perspectives, gender                                                                                                                                                                                            |
|                                 |                                                                                                                                                                                                                                                                                        |

SCHOLARONE™  
Manuscripts

Peer Review Only

1  
2  
3  
4  
5  
6  
7  
8  
9  
10  
11  
12  
13  
14  
15  
16  
17  
18  
19  
20  
21  
22  
23  
24  
25  
26  
27  
28  
29  
30  
31  
32  
33  
34  
35  
36  
37  
38  
39  
40  
41  
42  
43  
44  
45  
46  
47  
48  
49  
50  
51  
52  
53  
54  
55  
56  
57  
58  
59  
60

## Stoic Beliefs and Health: Development and Preliminary Validation of the Pathak-Wieten Stoicism Ideology Scale

**Elizabeth Barnett Pathak, PhD, MSPH, FAHA**

Department of Internal Medicine  
Morsani College of Medicine, University of South Florida

**Sarah Wieten, MA**

Department of Philosophy  
Department of Internal Medicine  
Morsani College of Medicine, University of South Florida

**Christopher W. Wheldon, PhD**

Department of Community and Family Health  
College of Public Health, University of South Florida

**Acknowledgements:** The authors are grateful to the respondents for their voluntary participation in this study. We would particularly like to thank the 4 peer reviewers of this manuscript, whose detailed and thoughtful readings resulted in a substantially improved final paper.

**Contributors:** EBP conceived the study. EBP and SW developed the preliminary PW-SIS. All authors enrolled participants and collected questionnaire data. CW contributed statistical expertise to the confirmatory factor analysis. EBP analyzed the data. All authors interpreted the results and outlined the paper. EBP drafted the manuscript. All authors contributed to literature review and substantive revisions to the paper.

**Funding:** This study was unfunded.

**Competing Interests:** The authors have no competing interests.

**Data Sharing:** No additional data available.

**Corresponding Author:** Dr. Elizabeth Pathak ([dr.elizabeth.pathak@gmail.com](mailto:dr.elizabeth.pathak@gmail.com))

**ABSTRACT**

**Introduction:** We developed and validated a new parsimonious scale to measure stoic beliefs. Key domains of stoicism are imperviousness to strong emotions, indifference to death, taciturnity, and self-sufficiency. In the context of illness and disease, a personal ideology of stoicism may create an internal resistance to objective needs, which can lead to negative consequences. Stoicism has been linked to help-seeking delays, inadequate pain treatment, caregiver strain, and suicide after economic stress.

**Methods:** During 2013-2014, 390 adults aged 18+ years completed a brief anonymous paper questionnaire containing the preliminary 24-item Pathak-Wieten Stoicism Ideology Scale (PW-SIS). Confirmatory factor analysis (CFA) was used to test an *a priori* multi-domain theoretical model. Content validity and response distributions were examined. Socio-demographic predictors of strong endorsement of stoicism were explored with logistic regression.

**Results:** The final PW-SIS contains 4 conceptual domains and 12 items. CFA showed very good model fit: RMSEA = 0.05 (95% CI 0.04-0.07), Goodness-of-Fit Index = 0.96 and Tucker-Lewis Index = 0.93. Cronbach's alpha was 0.78 and ranged from 0.64 to 0.71 for the sub-scales. Content validity analysis showed a statistically significant trend, with respondents who reported trying to be a stoic "all of the time" having the highest PW-SIS scores. Men were over two times as likely as women to fall into the top quartile of responses (OR=2.30, 95% CI 1.44 to 3.68,  $p < 0.001$ ). Odds ratios showing stronger endorsement of stoicism by Hispanics, Blacks, and Biracial persons were not statistically significant.

**Discussion:** The PW-SIS is a valid and theoretically coherent scale which is brief and practical for integration into a wide range of health behavior and outcomes research studies.

## Strengths and Limitations

- The Pathak-Wieten Stoicism Ideology Scale (PW-SIS) is a new, theoretically coherent, multi-dimensional scale which measures stoic beliefs and sense of self along 4 domains: Stoic Taciturnity, Stoic Endurance, Stoic Serenity, and Stoic Death Indifference.
- The PW-SIS contains 12 items and demonstrates good psychometric properties and content validity in a large sample (n=390) of educated adults.
- Mean stoicism ideology scores were higher for men than women, but for both genders the most frequent scores were neutral on stoic ideology, and the response distributions by gender overlapped almost completely.
- Further validation of the PW-SIS in demographically and socioeconomically diverse populations will improve its generalizability.

## INTRODUCTION

Stoicism is a school of philosophy which originated in ancient Greece.<sup>1-3</sup> Core elements in the classical definition of stoicism were an idealization of imperviousness to strong emotions, and an indifference to death.<sup>3</sup> Major Asian philosophical systems of thought, such as Buddhism and Confucianism, also endorsed stoic principles and teachings.<sup>4,5</sup> Beginning in the 19<sup>th</sup> century, academic and popular philosophers in Europe and the Americas were exposed to and influenced by Asian philosophy and religion. Therefore, it may not always be possible to distinguish whether particular strands of contemporary thought associated with stoicism originated in ancient Greece, ancient India, or elsewhere. For example, using very different language and symbolism, both the Greek Stoics and the Buddha exhorted the student to live fully and completely in the present, while minimizing concern about the future.

Contemporary meanings and connotations of stoicism have expanded beyond their ancient origins, to include ideals of taciturnity and self-sufficiency.<sup>6-8</sup> Today, the philosophical principles of stoicism can be seen to closely align with some personal ideologies, values and behaviors which are commonplace across many industrial nations, and are evident in many non-Western cultures as well.<sup>9-12</sup> For example, in the USA, the armed forces have explicitly embraced stoic ideology as a tool for mitigating combat stress.<sup>13,14</sup>

### **Previous Research on Stoicism and Health**

Much of the previous health-related research which mentions stoicism has invoked the term as a descriptor of particular patient groups or behaviors, without an explicit theoretical context.<sup>8</sup> Stoicism is mentioned most frequently in studies related to pain (particularly cancer pain) and coping strategies; indeed stoicism has been labeled a “coping strategy” in more than one study.<sup>6-8,15,16</sup> Stoicism has also been invoked as a defining characteristic of masculinity and as a key explanatory factor for certain health behaviors and outcomes among men. There are several psychometric instruments that measure endorsement or adherence to social norms of masculinity, but these scales include only a few items which explicitly assess stoicism.<sup>17-19</sup>

Direct measurement of stoicism in previous health-related measures has implicitly defined stoicism as a pattern of behaviors, not as an ideology. The pain attitudes questionnaire (PAQ), published in 2001, has a brief



1 subset of questions focused on stoic responses to physical pain.<sup>20-22</sup> The stoicism items in this scale were designed  
2  
3 to capture pain coping strategies of chronically ill or injured patients. Of the 29 items in the PAQ, most measured  
4  
5 past actions (i.e. pattern of behavior) and only 2 were explicitly focused on ideology: #2 “When I am in pain I  
6  
7 should keep it to myself,” and #24 “Pain is something that should be ignored.” The 20-item Liverpool Stoicism  
8  
9 Scale (LSS) was first developed in 1995<sup>23</sup> and has not been widely used.<sup>24-27</sup> The LSS predominantly (16 of 20  
10  
11 items) assesses a single theoretical domain (stoic taciturnity) of the 4 validated theoretical domains included in  
12  
13 the final PW-SIS scale (Table 1).  
14  
15  
16  
17  
18  
19  
20  
21  
22  
23  
24  
25  
26  
27  
28  
29  
30  
31  
32  
33  
34  
35  
36  
37  
38  
39  
40  
41  
42  
43  
44  
45  
46  
47  
48  
49  
50  
51  
52  
53  
54  
55  
56  
57  
58  
59  
60

**Table 1. Liverpool Stoicism Scale Items and Correspondence to Pathak-Wieten Stoicism Ideology Scale Conceptual Domains**

| Item # | Liverpool Stoicism Scale Item <sup>^</sup>                                  | Closest Domain from the Pathak-Wieten Stoicism Ideology Scale |
|--------|-----------------------------------------------------------------------------|---------------------------------------------------------------|
| 1      | I tend to cry at sad films                                                  | Stoic Taciturnity                                             |
| 2      | I sometimes cry in public                                                   | Stoic Taciturnity                                             |
| 3      | I do not let my problems interfere with my everyday life                    | Stoic Taciturnity                                             |
| 4      | I tend not to express my emotions                                           | Stoic Taciturnity                                             |
| 5      | I like someone to hold me when I am upset                                   | Stoic Taciturnity                                             |
| 6      | I do not get emotionally involved when I see suffering on television        | Stoic Serenity                                                |
| 7      | I would consider going to a counsellor if I had a problem                   | Stoic Taciturnity                                             |
| 8      | I tend to keep my feelings to myself                                        | Stoic Taciturnity                                             |
| 9      | I would not mind sharing my problems with a male friend                     | Stoic Taciturnity                                             |
| 10     | It makes me uncomfortable when people express their emotions in front of me | None                                                          |
| 11     | I don't really like people to know what I am feeling                        | Stoic Taciturnity                                             |
| 12     | I rely heavily on my friends for emotional support                          | Stoic Taciturnity                                             |
| 13     | I always take time out to discuss my problems with my family                | Stoic Taciturnity                                             |
| 14     | One should keep a "stiff upper lip"                                         | Stoic Serenity                                                |
| 15     | I believe that it is healthy to express one's emotions                      | Stoic Taciturnity                                             |
| 16     | Getting upset over the death of a loved one does not help                   | Stoic Death Indifference                                      |
| 17     | I would not mind sharing my problems with a female friend                   | Stoic Taciturnity                                             |
| 18     | A problem shared is a problem halved                                        | Stoic Taciturnity                                             |
| 19     | I would not cry at the funeral of a close friend or relative                | Stoic Taciturnity                                             |
| 20     | Expressing one's emotions is a sign of weakness                             | Stoic Taciturnity                                             |

<sup>^</sup> The Liverpool Stoicism Scale is reprinted with permission from Gaitniece-Putāne A. Liverpool Stoicism Scale Adaptation. *Baltic Journal of Psychology*. 2005;6(1):57-64. © Department of Psychology, University of Latvia, 2005. All rights reserved.

1  
2 Furthermore, the majority of items in the LSS focus on behavior or conduct, e.g. “I tend not to express my  
3 emotions.” However, there are 3 items that are ideological, e.g. “One should keep a ‘stiff upper lip’.” Both the LSS  
4 and the PAQ contain statements that are aphorisms (i.e. “Pain is something that should be ignored”) or proverbs  
5 (i.e. “A problem shared is a problem halved”). We consider these formats problematic, because these statements  
6 do not refer explicitly to the respondent. Consequently agreement cannot be interpreted as a reflection of self-  
7 identity. Furthermore, aphorisms and proverbs may invite endorsement to a great extent simply because of  
8 familiarity. In fact, Yong et al found that item #24, “Pain is something that should be ignored,” on the PAQ had a  
9 low alpha and reduced the internal consistency of their scale.<sup>21</sup>

### 20 **Theoretical Context**

21  
22 In 1983, Kathy Charmaz published a very influential sociological study on the “loss of self” suffered by  
23 people with chronic illnesses.<sup>28</sup> Although stoicism *per se* was mentioned only briefly, the idea that the suffering  
24 caused by disease emerges as much (or more) from threats to a person’s identity and sense of self as from purely  
25 bodily experiences of pathophysiology is one of the theoretical underpinnings of our work.

26  
27 In this report, we attempt to articulate an explicit theory of stoicism and its potential impact on health.  
28 We theorize that stoicism is a system for self-regulation rather than a behavior or personality trait. As a guide to  
29 ideal self-conduct, it requires self-conscious implementation and regular enforcement; in other words, stoicism is  
30 an ideology (e.g. a belief system which informs one’s attitudes and actions with the inherent potential for internal  
31 resistance and conflict). Personal ideologies create expectations for people about who they are, as well as how  
32 they should and should not behave. For example, we theorize that people who strongly endorse a personal  
33 ideology of stoicism may be more likely to avoid or delay seeking professional medical intervention for serious  
34 signs and symptoms of disease. This personal ideology of self will not mandate behavior in a deterministic fashion;  
35 rather, stoicism will create expectations of ideal behavior (which may not always be met). In order to test these  
36 theoretical propositions in future research, a validated measure of an individual’s endorsement of stoic ideologies  
37 is needed.

1  
2 The purpose of our study was to develop a theoretically coherent multi-dimensional scale to assess  
3  
4 endorsement of a personal ideology of stoicism, and to empirically validate this scale in a multiethnic sample of  
5  
6 healthy community-dwelling adults. We present the results of confirmatory factor analysis of the multi-domain  
7  
8 Pathak-Wieten Stoicism Ideology Scale (PW-SIS), and discuss the potential usefulness of this tool for predicting  
9  
10 constraints in health-related help-seeking behaviors. The PW-SIS is a generalized scale which assesses stoic beliefs  
11  
12 and sense of self but does not explicitly measure health behaviors or health outcomes. Therefore the PW-SIS can  
13  
14 be used in a wide range of empirical research studies.  
15  
16

17  
18 In addition, in this report we conducted an exploratory assessment of the association between high  
19  
20 endorsement of stoicism and participant age, gender, and race and ethnicity. We expect stoic ideologies to be  
21  
22 embedded in a larger system of cultural beliefs that may be related to age, gender, race and ethnicity, and other  
23  
24 social characteristics.  
25  
26  
27  
28

## 29 METHODS

### 30 31 Conceptual Development of the Stoicism Ideology Scale

32 Drawing on multiple scholarly and popular sources,<sup>1-3,6,15,29-31</sup> we developed the preliminary 24-item  
33  
34 Stoicism Ideology Scale (PW-SIS) to capture endorsement of 5 dimensions of stoicism (see Table S1 in the  
35  
36 Technical Supplement, available online). Based on our literature review and expert knowledge of philosophy, we  
37  
38 defined each domain as follows:  
39  
40  
41

42 *Stoic Taciturnity* is the belief that one should conceal one's problems and emotions from others.

43 *Stoic Endurance* is the belief that one should endure physical suffering without complaining.

44 *Stoic Composure* is the belief that one should control one's emotions and behavior under stress.

45 *Stoic Serenity* is the belief that one should refrain from experiencing strong emotions.

46 *Stoic Death Indifference* is the belief that one should not fear or avoid death.  
47  
48  
49  
50

51 Each item in our scale was carefully worded to capture the respondents' ideology, not their past behavior, using a  
52  
53 5-point Likert response scale with the following responses: "disagree," "somewhat disagree," "not sure,"  
54  
55 "somewhat agree," and "agree." Nine of the original 24 items were "reverse" items that specified anti-stoic  
56  
57 beliefs, i.e. "I believe I should experience strong emotions." The participant version of the scale (pen and paper  
58  
59  
60

questionnaire) listed response codes of 0 (disagree) through 4 (agree). These responses were re-coded during analysis to range from -2 (disagree) to +2 (agree). Consequently an average score of 0 corresponds to a neutral stance – neither endorsement nor rejection of stoicism. Positive scores indicate endorsement of a stoic ideology, while negative scores indicate rejection of a stoic ideology.

### **Data Collection**

This study was approved by the Institutional Review Board (IRB) of the University of South Florida. Data were collected over a period of 10 months during 2013-2014. All participants were university employees or students. Written consent forms were waived by the IRB to ensure respondent anonymity but all participants provided verbal informed consent. Each participant completed a brief paper-and-pencil questionnaire consisting of the 24-item preliminary PW-SIS, socio-demographic questions, and a final single item “I try to be a stoic” with a 7-item response scale ranging from “never” to “all the time.” The study population consisted of a convenience sample of 390 adults aged 18 years and older who were recruited in person by the authors in public common areas of university facilities (e.g. cafeterias), using walk-up tables. Monetary incentives were not provided to participants. A study response rate could not be calculated due to the data collection methods.

### **Data Analyses**

Data analysis proceeded in 5 steps. During Step 1, we examined univariate response distributions for each of the 24 scale items. A simple correlation matrix was examined to identify redundant items. Finally, we assessed content validity based on agreement with the statement “I try to be a stoic.” As a result of Step 1 analyses, 6 items were dropped from further analyses - including the entire Stoic Composure domain. Further details of this scale reduction step are included in the Technical Supplement, including Table S2.

During Step 2, we conducted a confirmatory factor analysis (CFA) of the reduced 18-item PW-SIS. CFA is the appropriate analytic choice to test scales that have an *a priori*, theoretically explicit sub-domain structure.<sup>32-36</sup> We used *proc calis* in SAS 9.4 for the CFA. Based on the results of the first CFA, we eliminated 2 items with poor factor loadings (see Technical Supplement for details).

1  
2 During Step 3, we repeated the CFA on the reduced 16-item PW-SIS. Finally, for the purpose of parsimony  
3  
4 we further reduced the total number of scale items to 12 (3 items in each of 4 domains) and conducted a CFA on  
5  
6 the final 12-item version of the PW-SIS (Step 4; see Table S3). Additional details and rationale for analytic Steps 1-  
7  
8 4, including data tables S1-S3, are provided in the Technical Supplement.  
9

10  
11 Step 5 of our analysis consisted of preliminary content validation, examination of response distributions  
12  
13 for the overall and domain scores, and exploratory logistic regression modeling of socio-demographic predictors  
14  
15 of strong endorsement of stoicism. For the logistic regression analysis, we categorized the outcome using the top  
16  
17 quartile of the overall distribution of responses to represent strong endorsement of stoicism.  
18  
19

## 20 21 22 **RESULTS**

23  
24 The size of our study population (n=390) provided more than 15 respondents for each question in the  
25  
26 preliminary scale, which exceeds the widely accepted norm of at least 10 respondents per question.<sup>37</sup> Although  
27  
28 skewed toward younger adults (78% of respondents were < 25 years old), the study population was in other  
29  
30 respects diverse (Table 2). A majority self-identified as female (57%) and white (55%). Hispanics (15%) and Blacks  
31  
32 (14%) were the second and third largest racial/ethnic groups, followed by Asians (9%) and biracial or other  
33  
34 ethnicity (6%). A substantial minority of respondents (19%) were born outside the U.S or Puerto Rico.  
35  
36  
37  
38  
39  
40  
41  
42  
43  
44  
45  
46  
47  
48  
49  
50  
51  
52  
53  
54  
55  
56  
57  
58  
59  
60

Table 2. Characteristics of the Study Population (n=390)

|                           | Number | Percent |
|---------------------------|--------|---------|
| <b>Age</b>                |        |         |
| 18 – 24 years             | 303    | 77.7    |
| 25 + years                | 87     | 22.3    |
|                           |        |         |
| <b>Gender</b>             |        |         |
| Female                    | 221    | 56.7    |
| Male                      | 169    | 43.3    |
|                           |        |         |
| <b>Race and Ethnicity</b> |        |         |
| White                     | 215    | 55.1    |
| Black                     | 55     | 14.1    |
| Hispanic                  | 59     | 15.1    |
| Asian                     | 36     | 9.2     |
| Biracial/Other            | 25     | 6.4     |
|                           |        |         |
| <b>Nativity</b>           |        |         |
| USA (inc. Puerto Rico)    | 315    | 80.8    |
| Other                     | 75     | 19.2    |
|                           |        |         |

The final 4-domain, 12-item Pathak-Wieten Stoicism Ideology Scale is shown in Table 3. Confirmatory factor analysis of the final scale showed very good model fit with individual item factor loadings ranging from 0.48 to 0.76, RMSEA = 0.05 (95% CI 0.04-0.07), Goodness-of-Fit Index = 0.96 and Tucker-Lewis Index = 0.93.

**Table 3. Pathak-Wieten Stoicism Ideology Scale (PW-SIS)**

Please read each statement and choose the answer that best reflects your own views.

| <input type="checkbox"/> Disagree                                                   | <input type="checkbox"/> Somewhat Disagree | <input type="checkbox"/> Not Sure | <input type="checkbox"/> Somewhat Agree | <input type="checkbox"/> Agree |
|-------------------------------------------------------------------------------------|--------------------------------------------|-----------------------------------|-----------------------------------------|--------------------------------|
| Item                                                                                | Domain <sup>^</sup>                        | Original Item #*                  |                                         |                                |
| 1. I expect myself to hide my aches and pains from others.                          | Stoic Endurance                            | Q2                                |                                         |                                |
| 2. I don't believe in talking about my personal problems.                           | Stoic Taciturnity                          | Q3                                |                                         |                                |
| 3. I expect myself to manage my physical discomfort without complaining.            | Stoic Endurance                            | Q5                                |                                         |                                |
| 4. I believe I should experience strong emotions. <i>[reverse code]</i>             | Stoic Serenity                             | Q8                                |                                         |                                |
| 5. When the time for my death comes, I believe I should accept it without fear.     | Stoic Death Indifference                   | Q12                               |                                         |                                |
| 6. I expect myself to hide my strong emotions from others.                          | Stoic Taciturnity                          | Q13                               |                                         |                                |
| 7. I would prefer to be unemotional.                                                | Stoic Serenity                             | Q14                               |                                         |                                |
| 8. I expect myself to manage my own problems without help from anyone.              | Stoic Taciturnity                          | Q15                               |                                         |                                |
| 9. I believe my physical pain is best handled by just keeping quiet about it.       | Stoic Endurance                            | Q17                               |                                         |                                |
| 10. I would be very upset if I knew my death was coming soon. <i>[reverse code]</i> | Stoic Death Indifference                   | Q18                               |                                         |                                |
| 11. I expect myself to avoid feeling intense emotions.                              | Stoic Serenity                             | Q20                               |                                         |                                |
| 12. I would not allow myself to be bothered by the fear of death.                   | Stoic Death Indifference                   | Q24                               |                                         |                                |

See Methods for scoring instructions

\* See Table S1 in the Technical Supplement, available online.

<sup>^</sup> Not included in participant questionnaire.

Relationships among the PW-SIS and its four conceptual domains are shown in Table 4. Cronbach's alpha ranged from 0.64 to 0.71 for the sub-scales and was 0.78 for the 12-item PW-SIS. Scores for Stoic Taciturnity were strongly correlated with scores for both Stoic Endurance and Stoic Serenity, but Stoic Endurance and Stoic Serenity were not highly correlated with each other. Stoic Death Indifference had the highest (most stoic) mean scores among the four domains, and it was least correlated with the other three domains.



Table 4. Conceptual Domains of the Pathak-Wieten Stoicism Ideology Scale

| Domain                                                                                                                | Mean Score (95% CI)       | Cronbach's $\alpha$ | Correlation with ST Score | Correlation with SE Score | Correlation with SS Score | Correlation with SDI Score |
|-----------------------------------------------------------------------------------------------------------------------|---------------------------|---------------------|---------------------------|---------------------------|---------------------------|----------------------------|
| <b>Stoic Taciturnity (ST):</b><br>The belief that one should conceal one's problems and emotions from others (Modern) | -0.08<br>(-0.18 to +0.02) | 0.71                | 1.00                      | 0.59<br>$p < 0.0001$      | 0.53<br>$p < 0.0001$      | 0.09<br>$p = 0.0729$       |
| <b>Stoic Endurance (SE):</b><br>The belief that one should endure physical suffering without complaining (Modern)     | +0.04<br>(-0.06 to +0.13) | 0.65                | 0.59<br>$p < 0.0001$      | 1.00                      | 0.35<br>$p < 0.0001$      | 0.18<br>$p = 0.0005$       |
| <b>Stoic Serenity (SS):</b><br>The belief that one should refrain from experiencing strong emotions (Classical)       | -0.66<br>(-0.75 to -0.56) | 0.64                | 0.53<br>$p < 0.0001$      | 0.35<br>$p < 0.0001$      | 1.00                      | 0.15<br>$p = 0.0031$       |
| <b>Stoic Death Indifference (SDI):</b><br>The belief that one should not fear or avoid death (Classical)              | +0.08<br>(-0.03 to +0.18) | 0.69                | 0.09<br>$p = 0.0729$      | 0.18<br>$p = 0.0005$      | 0.15<br>$p = 0.0031$      | 1.00                       |
| <b>Stoicism Ideology Scale (PW-SIS)</b>                                                                               | -0.16<br>(-0.22 to -0.09) | 0.78                | 0.79<br>$p < 0.0001$      | 0.74<br>$p < 0.0001$      | 0.72<br>$p < 0.0001$      | 0.53<br>$p < 0.0001$       |

Figure 1 depicts mean PW-SIS scores by response to the statement "I try to be a stoic." There was a clear monotonic and statistically significant trend, with respondents who reported trying to be a stoic "all of the time" having the highest stoicism scores, and respondents who reported trying to be a stoic "never" having the lowest stoicism scores. Most respondents chose one of the 3 intermediate categories. Respondents who chose "I don't know" as their response had stoicism scores similar to those who said they "sometimes" tried to be a stoic.

[Figure 1 here]

The distributions of mean scores for the 4 conceptual domain sub-scales are shown in Figure 2. Domain scores are comprised of the mean score for the 3 questions in the domain. In this study population, respondents were least likely to endorse Stoic Serenity and most likely to endorse Stoic Death Indifference.

[Figure 2 here]

1  
2 The full distribution of respondent scores is shown separately for women and men in Figure 3. The  
3  
4 distributions overlapped almost completely, but there were no men with the least stoic scores, and no women  
5  
6 with the most stoic scores. Response distributions were skewed to the left for women (less stoic) and to the right  
7  
8 for men (more stoic), consistent with a statistically significant difference in the mean scores for women (-0.31,  
9  
10 95% CI -0.40 to -0.22) and men (+0.04, 95% CI -0.05 to +0.14).  
11  
12

13  
14  
15 [Figure 3 here]  
16  
17  
18  
19

20 Results of an exploratory analysis of sociodemographic predictors of high endorsement of stoicism are  
21  
22 shown in Table 5. There is no *a priori* cut point designated as “highly stoic” in the PW-SIS; in this analysis the cut  
23  
24 point used was a mean score greater than the 75<sup>th</sup> percentile of the overall response distribution. The top quartile  
25  
26 of the distribution of all respondents (n=390) ranged from +0.33 to +1.67. Among women, 18.9% strongly  
27  
28 endorsed stoicism, compared with 32.8% of men. After multivariate adjustment, men were over two times as  
29  
30 likely as women to fall into the top quartile of responses (OR=2.30, 95% CI 1.44 to 3.68, p<0.001). Adults born in  
31  
32 the USA or Puerto Rico were also twice as likely as adults born elsewhere to strongly endorse stoicism (OR=1.97,  
33  
34 95% CI 1.01 to 3.84, p=0.048). Odds ratios showing stronger endorsement of stoicism by Hispanics, Blacks, Biracial  
35  
36 persons, and adults 25 years and older were not statistically significant.  
37  
38  
39  
40  
41  
42  
43  
44  
45  
46  
47  
48  
49  
50  
51  
52  
53  
54  
55  
56  
57  
58  
59  
60

**Table 5. Sociodemographic Predictors of a Mean PW-SIS Score in the Top Quartile (> 0.167)**

|                        | Odds Ratio<br>(95% CI) | p value |
|------------------------|------------------------|---------|
| <b>Age 18-24 years</b> | 1.00 (referent)        |         |
| <b>Age 25-73 years</b> | 1.34 (0.76 - 2.35)     | n.s.    |
| <b>Men</b>             | 2.30 (1.44 - 3.68)     | < 0.001 |
| <b>Women</b>           | 1.00 (referent)        |         |
| <b>Asian</b>           | 0.93 (0.38 - 2.25)     | n.s     |
| <b>Black</b>           | 1.55 (0.78 - 3.09)     | n.s     |
| <b>Biracial/Other</b>  | 1.70 (0.66 - 4.34)     | n.s     |
| <b>Hispanic</b>        | 1.88 (0.99 - 3.56)     | n.s     |
| <b>Whites</b>          | 1.00 (referent)        |         |
| <b>Born in the USA</b> | 1.97 (1.01 - 3.84)     | 0.048   |
| <b>Born elsewhere</b>  | 1.00 (referent)        |         |

## DISCUSSION

The Pathak-Wieten Stoicism Ideology Scale is a theoretically coherent, multi-dimensional scale which demonstrates good psychometric properties and content validity based on initial validation in a large sample of educated adults. The PW-SIS is also brief and practical for integration into a wide range of empirical research studies. In our study population of mostly younger adults, endorsement of stoicism varied by conceptual domain, with the weakest endorsement of the classical domain Stoic Serenity (aversion to strong emotions). Exploratory logistic regression analysis identified male gender and USA birth as significant predictors of strong endorsement of stoicism. Finally, point estimates suggested higher endorsement of stoicism for Blacks, Hispanics, and Biracial persons compared with Whites, but these results were not statistically significant.

Integration of our theory of a stoic ideology of the self into existing health behavior models could help explain the formation of beliefs and attitudes toward criterion-specific help-seeking behaviors. Reasoned action approaches - such as the Integrative Model of Behavior Prediction - poorly define background factors that underlie belief formation.<sup>38</sup> Measurement of self-concepts, such as stoicism ideologies, may help explain this population variability. Expanding health behavior theory to include aspects of the self could also help inform health education messaging and risk-based communication.

1  
2 Ironically, a personal ideology of stoicism almost guarantees failure to live up to one's personal ideal.  
3  
4 Experiences of illness and disease often involve transient weakness and functional limitations. With aging, these  
5  
6 experiences will increase in frequency, duration, and severity for most people. Simply put, experiences of illness  
7  
8 and disease tend to require aid – whether from health professionals in a formal context, or from family members  
9  
10 or friends in an informal context. An ideology of stoicism creates an internal resistance to external objective  
11  
12 needs, which can lead to negative consequences.<sup>8-12</sup>  
13  
14  
15  
16  
17

### 18 **Gender and Stoicism**

19  
20 Stoicism is widely viewed as a defining attribute of masculinity. Instruments designed to assess  
21  
22 endorsement of hegemonic masculine ideologies have included specific questions that touch on stoicism.  
23  
24 However, the conceptual and measurement overlap between these instruments and the 4-domain PW-SIS is  
25  
26 minor.<sup>17</sup> For example, in the widely used Personal Attributes Questionnaire, only 2 of 24 items relate to a single  
27  
28 domain of the PW-SIS. The Conformance to Masculine Norms scale assesses 11 distinct domains of masculinity, of  
29  
30 which only 2 (emotional control and self-reliance) partially overlap with domains of the PW-SIS.<sup>18,19</sup> In our study,  
31  
32 the results are notable because for both genders the most frequent scores were in the middle of the distribution  
33  
34 (neutral on stoic ideology), and the response distributions for women and men overlapped almost completely.  
35  
36 Despite the fact that men were twice as likely as women to strongly endorse stoic ideology, our results suggest  
37  
38 that gendered stereotypes about stoicism (“stoic men” and “emotional women”) are overblown. Because the PW-  
39  
40 SIS is agnostic to respondents' genders, it is ideally suited to investigate the empirical reality of stoicism among  
41  
42 both women and men. Furthermore, our finding that a minority of women strongly endorsed stoic ideology may  
43  
44 be particularly important. For example, a study of major strain among family caretakers of elderly dementia  
45  
46 patients found that those who used stoicism as a coping strategy suffered burnout, while those who sought social  
47  
48 support did not.<sup>39</sup>  
49  
50  
51  
52  
53  
54  
55  
56  
57  
58  
59  
60

### **Study Limitations**

In any questionnaire-based scale, validity of the individual items and the total scale against the concept of interest is of paramount concern. Unlike many psychometric instruments, the PW-SIS does not purport to measure a latent, inherent trait such as personality, or a clinically-definable disorder such as depression or anxiety. Rather, we attempt to measure an explicit set of beliefs, which by definition are neither inborn nor immutable. Therefore, a robust assessment of the content validity of our scale items must come after publication and evaluation by multiple experts and researchers. We included a single questionnaire item “I try to be a stoic” to assess content validity, but future validation and outcome studies could expand on this approach or include a qualitative component.

A related question pertains to the predictive validity of the PW-SIS. In other words, to what extent does strong endorsement of stoic ideology predict actual stoic behaviors? Predictive validity can only be rigorously addressed through prospective study designs.

Our study population, similar to many scale validation studies, was university-based. Therefore validity and generalizability to very different populations should not be assumed, but instead tested in future studies. In particular, validation of the PW-SIS among the elderly and persons of lower educational attainment would be valuable for health-related research.

### **Strengths of the PW-SIS**

Our scale has several strengths. First, all items refer explicitly to the respondent; there are no aphorisms or proverbs. Second, each item refers to an expectation or belief about ideal self-conduct, rather than to a simple description of past behavior. So for example, Q5 states “I expect myself to manage my physical discomfort without complaining” rather than “I always manage my physical discomfort without complaining.” This distinction is critical to the theoretical underpinnings of the scale. Thirdly, we deliberately chose not to mention disease or illness in the scale items, so that the scale would be appropriate for a wide range of study populations, including currently healthy individuals. (Although some items do explicitly mention “physical pain” and “everyday aches and pains.”) Our intention was to capture the respondents’ *global* endorsement of stoicism as a *code of ideal conduct*.

1  
2 Finally, the PW-SIS does not reference gender norms, so it can serve as a tool to empirically investigate gender  
3  
4 differences in stoic ideology.  
5

### 6 Directions for future research

7  
8 The PW-SIS should be validated in multiple study populations with a range of socioeconomic and  
9  
10 demographic characteristics. Our theory that ideologies of stoicism will result in constraints on health-related  
11  
12 behaviors needs to be empirically tested, ideally in rigorously designed prospective studies. Given the rise of  
13  
14 patient-centered health care,<sup>40,41</sup> understanding patients' motivations and perspectives has never been more  
15  
16 important. The current health education paradigm holds that improving patients' knowledge of symptoms and  
17  
18 signs will result in more timely help-seeking behavior.<sup>38,42-44</sup> Each year thousands of individuals suffer needlessly  
19  
20 and many die because of extended delays in seeking professional aid for acute medical conditions (e.g.,  
21  
22 myocardial infarctions, strokes, diabetic emergencies, cancer complications and pain, and acute exacerbations of  
23  
24 congestive heart failure).<sup>45-52</sup> Numerous studies have been conducted to attempt to elucidate the reasons behind  
25  
26 patient delays,<sup>46-51,53</sup> with the ultimate goal of designing education programs and interventions that will result in  
27  
28 timely help-seeking. Significant risk factors for help-seeking reluctance have been identified (e.g. Black race<sup>52,54,55</sup>)  
29  
30 but much of the variation remains unexplained and we still lack a complete understanding of *why* certain patients  
31  
32 and not others delay seeking aid.  
33  
34  
35  
36  
37

38 A distinction of our theory is movement of the focus of inquiry away from the disease and the patient's  
39  
40 relationship to the disease (e.g. health knowledge, symptom awareness, ability to comply with self-care regimens)  
41  
42 and onto *patients' sense of self* – their self-concepts and self-identity.<sup>56</sup> We hypothesize that illness behaviors may  
43  
44 become “noncompliant” or “irrational” or “self-harming” when specific courses of action would create an internal  
45  
46 conflict with patients' ideas of *who they are*. Specifically, we posit that people who strongly believe that they  
47  
48 should manage their problems on their own, not show emotions, and not complain about physical discomfort will  
49  
50 experience an internal cognitive conflict when faced with a situation that could require help from others. This  
51  
52 internal conflict will lead to delays in or avoidance of help-seeking, with potentially life-threatening consequences.  
53  
54  
55 For example, empirical studies of increasing rates of male suicide in rural Australia have identified hegemonic  
56  
57  
58  
59  
60

1 masculine norms of stoicism as an important causal factor in the context of severe economic stress.<sup>57,58</sup>  
 2  
 3  
 4 Understanding the influences of race, ethnicity, socioeconomic status, religion, and other cultural factors on stoic  
 5  
 6 ideologies may help explain past research findings on delays in help-seeking. Finally, there may also be positive  
 7  
 8 health consequences of stoic ideologies for individuals,<sup>15</sup> which careful prospective research could confirm.  
 9  
 10

## 11 FIGURE LEGENDS

12 Figure 1. Content Validity of the Pathak-Wieten Stoicism Ideology Scale: Mean Scores by Response to the  
 13 Statement "I try to be a stoic"  
 14

15 Figure 2. Pathak-Wieten Stoicism Ideology Scale: Distribution of Domain Scores  
 16

17 Figure 3. Pathak-Wieten Stoicism Ideology Scale: Distribution of Overall Scores by Gender  
 18  
 19  
 20  
 21  
 22  
 23  
 24

## 25 REFERENCES

- 26 1. Epictetus. *Enchiridion*. Long G, trans: Dover Publications; 2004.
- 27 2. Aurelius M. *Meditations*. Long G, trans: Dover Publications; 1997.
- 28 3. Baltzly D. Stoicism. In: Zalta EN, ed. *The Stanford Encyclopedia of Philosophy*. Winter 2010  
 29 Edition ed. Palo Alto CA: Stanford University; 2010.
- 30 4. Gowans CW. Medical analogies in Buddhist and Hellenistic thought: tranquility and anger. *Royal*  
 31 *Institute of Philosophy Supplement*. 2010;66:11-33.
- 32 5. Wong DB. The meaning of detachment in Daoism, Buddhism, and Stoicism. *Dao: A Journal of*  
 33 *Comparative Philosophy*. 2006;5(2):207-219.
- 34 6. Becker LC. Human health and stoic moral norms. *J Med Philos*. 2003;28(2):221-238.
- 35 7. Stempsey WE. A new stoic: the wise patient. *Med Philos*. 2004;29(4):451-472.
- 36 8. Moore A, Grime J, Campbell P, Richardson J. Troubling stoicism: Sociocultural influences and  
 37 applications to health and illness behaviour. *Health* 2013;17(2):159-173.
- 38 9. Sargent C. Between death and shame: dimensions of pain in Bariba culture. *Soc Sci Med*.  
 39 1984;19(12):1299-1304.
- 40 10. Latimer M, Finley GA, Rudderham S, et al. Expression of pain among Mi'kmaq children in one  
 41 Atlantic Canadian community: a qualitative study. *CMAJ Open*. 2014;2(3):e133-3138.
- 42 11. Te Karu L, Bryant L, Elley CR. Maori experiences and perceptions of gout and its treatment: a  
 43 kaupapa Maori qualitative study. *J Prim Health Care*. 2013;5(3):214-222.
- 44 12. Caldwell JC, Orubuloye IO, Caldwell P. Underreaction to AIDS in Sub-Saharan Africa. *Soc Sci*  
 45 *Med*. 1992;34(11):1169-1182.
- 46 13. Jarrett T. Warrior Resilience Training in Operation Iraqi Freedom: combining rational emotive  
 47 behavior therapy, resiliency, and positive psychology. *US Army Med Dep J*. 2008 (Jul-Sep):32-  
 48 38.
- 49 14. Jarrett TA. Warrior Resilience and Thriving (WRT): Rational Emotive Behavior Therapy (REBT)  
 50 as a Resiliency and Thriving Foundation to Prepare Warriors and Their Families for Combat  
 51 Deployment and Posttraumatic Growth in Operation Iraqi Freedom, 2005–2009. *J Rat-Emo*  
 52 *Cognitive-Behav Ther* 2013;31.
- 53 15. Hutnick N, Smith P, Koch T. What does it feel like to be 100? Socio-emotional aspects of well-  
 54 being in the stories of 16 centenarians living in the United Kingdom. *Aging & mental health*.  
 55 2012;16(7):811-818.

16. Waitzkin H, Britt T, Williams C. Narratives of aging and social problems in medical encounters with older persons. *J Health Soc Behav.* 1994;35(4):322-348.
17. Smiler AP. Thirty years after the discovery of gender: psychological concepts and measures of masculinity. *Sex Roles.* 2004;50(1):15-26.
18. Smiler AP. Conforming to masculine norms: evidence for validity among adult men and women? *Sex Roles.* 2006;54(767-775).
19. Mahalik JR, Locke BD, Ludlow LH, et al. Development of the Conformity to Masculine Norms Inventory. *Psychology of Men & Masculinity.* 2003;4(1):3-25.
20. Yong HH. Can attitudes of stoicism and cautiousness explain observed age-related variation in levels of self-rated pain, mood disturbance and functional interference in chronic pain patients? *Eur J Pain.* 2006;10(5):399-407.
21. Yong HH, Bell R, Workman B, Gibson SJ. Psychometric properties of the Pain Attitudes Questionnaire (revised) in adult patients with chronic pain. *Pain.* 2003;104(3):673-681.
22. Yong HH, Gibson SJ, Horne DJ, Helme RD. Development of a pain attitudes questionnaire to assess stoicism and cautiousness for possible age differences. *J Gerontol B Psychol Sci Soc Sci.* 2001;56(5):279-284.
23. Wagstaff G, Rowledge A. Stoicism: Its relation to gender, attitude toward poverty, and reactions to emotive material. *Journal of Social Psychology.* 1995;135:181-184.
24. Gaitniece-Putāne A. Liverpool Stoicism Scale Adaptation. *Baltic Journal of Psychology.* 2005;6(1):57-64.
25. Smith AR, Yeager AE, Dodd DR. The joint influence of acquired capability for suicide and stoicism on over-exercise among women. *Eating Behaviors.* 2015;17:77-82.
26. Whealin JM, Kuhn E, Pietrzak RH. Applying behavior change theory to technology promoting veteran mental health care seeking. *Psychological Services.* 2014;11(4):486-494.
27. Witte TK, Gordon KH, Smith PN, Van Orden KA. Stoicism and sensation seeking: male vulnerabilities for the acquired capability for suicide. *Journal of Research in Personality.* 2012;46(4):384-392.
28. Charmaz K. Loss of self: a fundamental form of suffering in the chronically ill. *Sociology of Health and Illness.* 1983;5(2):168-195.
29. Hammond WP, Matthews D, Mohottige D, Agyemang A, Corbie-Smith G. Masculinity, medical mistrust, and preventive health services delays among community-dwelling African-American men. *Journal of general internal medicine.* 2010;25(12):1300-1308.
30. Levant RF, Rankin TJ, Williams CM, Hasan NT, Smalley KB. Evaluation of the factor structure and construct validity of scores on the Male Role Norms Inventory—Revised (MRNI-R). *Psychology of Men & Masculinity.* 2010;11(1):25-37.
31. Wheldon CW, Pathak EB. Masculinity and Relationship Agreements among Male Same-Sex Couples. *Journal of Sex Research.* 2010;47(5):460-470.
32. Devon HA, Block ME, Moyle-Wright P, et al. A Psychometric Toolbox for Testing Validity and Reliability. *Journal of Nursing Scholarship.* 2007;39(2):155-164.
33. Fabringer LR, Wegener DT, MacCallum RC, Straham EJ. Evaluating the Use of Exploratory Factor Analysis in Psychological Research. *Psychological Methods.* 1999;4(3):272-299.
34. Brotherton R, French CC, Pickering AD. Measuring belief in conspiracy theories: the generic conspiracist beliefs scale. *Frontiers in psychology.* 2013;4.
35. de Nooijer J, Puijk-Hekman S, van Assema P. The compensatory health beliefs scale: psychometric properties of a cross-culturally adapted scale for use in The Netherlands. *Health education research.* 2009;24(5):811-817.
36. Downey L, Curtis JR, Lafferty WE, Herting JR, Engelberg RA. The Quality of Dying and Death Questionnaire (QODD): empirical domains and theoretical perspectives. *Journal of pain and symptom management.* 2010;39(1):9-22.
37. Tabachnick BG, Fidell LS. *Using Multivariate Statistics.* Boston: Allyn and Bacon; 2001.
38. Glanz K, Rimer BK, Viswanath K, eds. *Health Behavior: Theory, Research, and Practice (Fifth Edition).* San Francisco: Jossey-Bass; 2015.
39. AlMBERG B, Grafstrom M, Winblad B. Major strain and coping strategies as reported by family members who care for aged demented relatives. *J Adv Nurs.* 1997;26(4):683-691.



- 1  
2 40. Clark AM, Savard LA, Spaling MA, Heath S, Duncan A, Spiers JA. Understanding help-seeking  
3 decisions in people with heart failure: a qualitative systematic review. *International journal of*  
4 *nursing studies*. 2012;49(12):1582-1597.
- 5 41. Moloczij N, McPherson KM, Smith JF, Kayes NM. Help-seeking at the time of stroke: stroke  
6 survivors' perspectives on their decisions. *Health & social care in the community*. 2008;16(5):501-  
7 510.
- 8 42. Caldwell MA, Miaskowski C. Mass media interventions to reduce help-seeking delay in people  
9 with symptoms of acute myocardial infarction: time for a new approach? *Patient Educ Couns*.  
10 2002;46(1):1-9.
- 11 43. Lecouturier J, Rodgers H, Murtagh MJ, White M, Ford GA, Thomson RG. Systematic review of  
12 mass media interventions designed to improve public recognition of stroke symptoms, emergency  
13 response and early treatment. *BMC public health*. 2010;10.
- 14 44. Luca NR, Suggs LS. Theory and model use in social marketing health interventions. *Journal of*  
15 *health communication*. 2013;18(1):20-40.
- 16 45. Go AS, Mozaffarian D, Roger VL, al. e. Heart disease and stroke statistics - 2014 update: a report  
17 from the American Heart Association. *Circulation*. 2014;129(3):e28-e292.
- 18 46. Zock E, Kerkhoff H, Kleyweg RP, van de Beek D. Intrinsic factors influencing help-seeking  
19 behavior in an acute stroke situation. *Acta neurologica Belgica*. 2016;116(3):295-301.
- 20 47. Mackintosh JE, Murtagh MJ, Rodgers H, Thomson RG, Ford GA, White M. Why people do, or do  
21 not, immediately contact emergency medical services following the onset of acute stroke:  
22 qualitative interview study. *PLOS One*. 2012;7(10).
- 23 48. Davis LL, Mishe IM, Moser DK, Esposito N, Lynn MR, Schwartz TA. Thoughts and behaviors of  
24 women with symptoms of acute coronary syndrome. *Heart & lung : the journal of critical care*.  
25 2013;42(6):428-435.
- 26 49. Galdas PM, Johnson JL, Percy ME, Ratner PA. Help seeking for cardiac symptoms: beyond the  
27 masculine-feminine binary. *Soc Sci Med*. 2010;71(1):18-24.
- 28 50. Whitaker KL, Macleod U, Winstanley K, Scott SE, Wardie J. Help seeking for cancer 'alarm'  
29 symptoms: a qualitative interview study of primary care patients in the UK. *Br J Gen Pract*.  
30 2015;65(631):e96-e105.
- 31 51. Yousaf O, Grunfeld EA, Hunter MS. A systematic review of the factors associated with delays in  
32 medical and psychological help-seeking among men. *Health Psychol Rev*. 2015;9(2):264-276.
- 33 52. Powell W, Adams LB, Cole-Lewis Y, Agyemang A, Upton RD. Masculinity and race-related  
34 factors as barriers to help-seeking among African American men. *Behav Med*. 2016;42(3):150-  
35 163.
- 36 53. Nymark C, Mattiasson AC, Henriksson P, Kiessling A. The turning point: from self-regulative  
37 illness behaviour to care-seeking in patients with an acute myocardial infarction. *Journal of*  
38 *clinical nursing*. 2009;18(23):3358-3365.
- 39 54. Lee H, Bahler R, Chung C, Alonzo A, Zeller RA. Prehospital delay with myocardial infarction: the  
40 interactive effect of clinical symptoms and race. *Applied nursing research : ANR*. 2000;13(3):125-  
41 133.
- 42 55. Evangelista LS, Dracup K, Doering LV. Racial differences in treatment-seeking delays among  
43 heart failure patients. *Journal of cardiac failure*. 2002;8(6):381-386.
- 44 56. Baumeister RF. Self and identity: a brief overview of what they are, what they do, and how they  
45 work. *Annals of the New York Academy of Sciences*. 2011;1234:48-55.
- 46 57. Alston M. Rural male suicide in Australia. *Soc Sci Med*. 2012;74(4):515-522.
- 47 58. Alston M, Kent J. The big dry: the link between rural masculinities and poor health outcomes for  
48 farming men. *Journal of Sociology*. 2008;44(2):133-147.
- 49  
50  
51  
52  
53  
54  
55  
56  
57  
58  
59  
60

**Figure 1.**  
**Content Validity of the Pathak-Wieten Stoicism Ideology Scale:**  
**Mean Scores by Response to the Statement “I try to be a stoic”**



Figure 1. Content Validity of the Pathak-Wieten Stoicism Ideology Scale: Mean Scores by Response to the Statement “I try to be a stoic”

130x87mm (300 x 300 DPI)

1  
2  
3  
4  
5  
6  
7  
8  
9  
10  
11  
12  
13  
14  
15  
16  
17  
18  
19  
20  
21  
22  
23  
24  
25  
26  
27  
28  
29  
30  
31  
32  
33  
34  
35  
36  
37  
38  
39  
40  
41  
42  
43  
44  
45  
46  
47  
48  
49  
50  
51  
52  
53  
54  
55  
56  
57  
58  
59  
60

**Figure 2.**  
**Pathak-Wieten Stoicism Ideology Scale: Distribution of Domain Scores**



Figure 2. Pathak-Wieten Stoicism Ideology Scale: Distribution of Domain Scores

139x100mm (300 x 300 DPI)

**Figure 3.**  
**Pathak-Wieten Stoicism Ideology Scale: Distribution of Overall Scores by Gender**



Figure 3. Pathak-Wieten Stoicism Ideology Scale: Distribution of Overall Scores by Gender

142x104mm (300 x 300 DPI)

**Pathak Stoicism Paper****Technical Supplement**

Scale items under each of the 5 domains along with response frequencies for the preliminary 24-item PW-SIS are shown in Table S1. The results of the assessment of redundancy and content validity (Step 1) are shown in Table S2. We dropped 2 items (Q1 and Q4) because they were highly correlated with other items. The entire Stoic Composure domain, with 4 questions, was dropped after consideration of content validity. At every level of response to the statement “I try to be a stoic,” from “never” to all “all the time,” responses to the 4 Stoic Composure items were highly pro-stoic. Furthermore, the overall response distributions for 3 of the 4 items (Q10, Q21, and Q22) were highly skewed, with only 7%, 4%, and 3% disagreeing with these statements (Table S1). There were no other items in the scale that resulted in such highly skewed response distributions. We concluded that this domain was referencing a strongly sanctioned social norm, and that while the items were not explicitly worded as aphorisms, they might be functioning in the same way. Some respondents may have been inhibited to admit that they did not believe that they should stay cool in an emergency, if they perceived that a strong socio-cultural norm existed. Interestingly, the only reverse-coded item under this domain, Q16: “I believe it’s okay to let myself get upset and distracted in a major crisis,” elicited a less skewed response, although the majority of respondents still disagreed with this statement. Given that there was only a single item which performed marginally well, we decided to drop the entire domain.

Confirmatory factor analysis of the reduced 18-item, 4-domain PW-SIS resulted in strong factor loadings for 16 of the 18 items (Table S2), and decent model fit statistics (Table S3). Both items which were dropped (Q23 and Q6) were reverse-code items. Removal of these 2 items resulted in slightly improved model fit statistics (Table S3) when the CFA was re-run on the remaining 16 items.

As shown in Table S2, the 16-item scale retained 6 items for Stoic Taciturnity, 4 items for Stoic Endurance, 3 items for Stoic Serenity, and 3 items for Stoic Death Indifference. In the interest of parsimony, we decided to remove an additional 4 items, so that the final scale would retain 3 items for each of the 4 domains. We dropped 3 items from Stoic Taciturnity (Q7, Q9, and Q19), and 1 item from Stoic Endurance (Q11) - all with the lowest

1  
2 factor loadings, and all reverse-code items. Factor loadings for the remaining 12 items changed little in the final  
3  
4 CFA model (Table S2), but model fit statistics improved so that the final RMSEA = 0.05 (95% CI 0.04-0.07),  
5  
6 Goodness-of-Fit Index = 0.96, and Tucker-Lewis Index = 0.93.  
7  
8  
9  
10  
11  
12  
13  
14  
15  
16  
17  
18  
19  
20  
21  
22  
23  
24  
25  
26  
27  
28  
29  
30  
31  
32  
33  
34  
35  
36  
37  
38  
39  
40  
41  
42  
43  
44  
45  
46  
47  
48  
49  
50  
51  
52  
53  
54  
55  
56  
57  
58  
59  
60

For peer review only

| Table S1. Preliminary Pathak-Wieten Stoicism Ideology Scale: Domains, Item Content, and Response Frequencies (n=390) |                                                                                                      |               |                        |              |                     |            |
|----------------------------------------------------------------------------------------------------------------------|------------------------------------------------------------------------------------------------------|---------------|------------------------|--------------|---------------------|------------|
| Original Item #                                                                                                      | Core Meaning / Scale Items                                                                           | Disagree (-2) | Somewhat Disagree (-1) | Not sure (0) | Somewhat Agree (+1) | Agree (+2) |
| <b>Stoic Taciturnity: The belief that one should conceal one's problems and emotions from others (Modern)</b>        |                                                                                                      |               |                        |              |                     |            |
| Q1                                                                                                                   | I prefer to keep my intense feelings to myself.                                                      | 10%           | 17%                    | 6%           | 40%                 | 27%        |
| Q3                                                                                                                   | I don't believe in talking about my personal problems.                                               | 23%           | 31%                    | 14%          | 26%                 | 6%         |
| Q7                                                                                                                   | I believe it's fine if I cry openly in front of other people. <i>(reverse)</i>                       | 31%           | 28%                    | 12%          | 18%                 | 11%        |
| Q9                                                                                                                   | I believe in discussing my personal problems with family and friends. <i>(reverse)</i>               | 3%            | 12%                    | 14%          | 37%                 | 33%        |
| Q13                                                                                                                  | I expect myself to hide my strong emotions from others.                                              | 13%           | 23%                    | 19%          | 32%                 | 13%        |
| Q15                                                                                                                  | I expect myself to manage my own problems without help from anyone.                                  | 16%           | 24%                    | 13%          | 34%                 | 13%        |
| Q19                                                                                                                  | If my emotions get very intense, I believe it's all right to just show them openly. <i>(reverse)</i> | 16%           | 25%                    | 23%          | 27%                 | 8%         |
| <b>Stoic Endurance: The belief that one should endure physical suffering without complaining (Modern)</b>            |                                                                                                      |               |                        |              |                     |            |
| Q2                                                                                                                   | I expect myself to hide my aches and pains from others.                                              | 8%            | 24%                    | 12%          | 41%                 | 15%        |
| Q4                                                                                                                   | I don't believe in bothering people close to me with my aches and pains.                             | 20%           | 27%                    | 14%          | 27%                 | 12%        |
| Q5                                                                                                                   | I expect myself to manage my physical discomfort without complaining.                                | 9%            | 18%                    | 14%          | 44%                 | 16%        |
| Q11                                                                                                                  | If I am suffering, I believe in telling someone about my physical pain. <i>(reverse)</i>             | 5%            | 9%                     | 16%          | 37%                 | 33%        |
| Q17                                                                                                                  | I believe my physical pain is best handled by just keeping quiet about it.                           | 29%           | 29%                    | 22%          | 15%                 | 5%         |
| Q23                                                                                                                  | I believe in letting myself complain about everyday aches and pains. <i>(reverse)</i>                | 39%           | 32%                    | 16%          | 11%                 | 3%         |
| <b>Stoic Composure: The belief that one should control one's emotions and behavior under stress (Modern)</b>         |                                                                                                      |               |                        |              |                     |            |
| Q10                                                                                                                  | I expect myself to remain calm and decisive in an emergency.                                         | 2%            | 5%                     | 11%          | 29%                 | 54%        |
| Q16                                                                                                                  | I believe it's okay to let myself get upset and distracted in a major crisis. <i>(reverse)</i>       | 29%           | 25%                    | 19%          | 19%                 | 7%         |
| Q21                                                                                                                  | I believe I should be calm and level-headed.                                                         | 2%            | 2%                     | 5%           | 35%                 | 56%        |
| Q22                                                                                                                  | I believe I should stay cool and steady when the pressure is high and the situation is tense.        | 1%            | 2%                     | 8%           | 36%                 | 54%        |
| <b>Stoic Serenity: The belief that one should refrain from experiencing strong emotions (Classical)</b>              |                                                                                                      |               |                        |              |                     |            |
| Q8                                                                                                                   | I believe I should experience strong emotions. <i>(reverse)</i>                                      | 4%            | 8%                     | 21%          | 33%                 | 34%        |
| Q14                                                                                                                  | I would prefer to be unemotional.                                                                    | 37%           | 20%                    | 17%          | 14%                 | 11%        |
| Q20                                                                                                                  | I expect myself to avoid feeling intense emotions.                                                   | 25%           | 31%                    | 19%          | 19%                 | 5%         |
| <b>Stoic Death Indifference: The belief that one should not fear or avoid death (Classical)</b>                      |                                                                                                      |               |                        |              |                     |            |
| Q6                                                                                                                   | I believe it's okay if I worry about dying too soon. <i>(reverse)</i>                                | 25%           | 16%                    | 24%          | 19%                 | 17%        |
| Q12                                                                                                                  | When the time for my death comes, I believe I should accept it without fear.                         | 8%            | 12%                    | 20%          | 21%                 | 39%        |
| Q18                                                                                                                  | I would be very upset if I knew my death was coming soon. <i>(reverse)</i>                           | 13%           | 6%                     | 22%          | 21%                 | 39%        |
| Q24                                                                                                                  | I would not allow myself to be bothered by the fear of death.                                        | 14%           | 19%                    | 26%          | 17%                 | 24%        |

Table S2. **Confirmatory Factor Analysis and Item Reduction** (n=390)

| Item | Core Meaning / Scale Items                                                                           | Step 1:<br>Assessment of Redundancy<br>and Content Validity | Step 2:<br>CFA of 4-Domain,<br>18-Item Scale | Step 3:<br>CFA of 4-Domain,<br>16-Item Scale | Step 4:<br>CFA of 4-Domain,<br>12-Item Final Scale |
|------|------------------------------------------------------------------------------------------------------|-------------------------------------------------------------|----------------------------------------------|----------------------------------------------|----------------------------------------------------|
|      | <b>Stoic Taciturnity</b>                                                                             |                                                             | factor loadings                              | factor loadings                              | factor loadings                                    |
| Q1   | I prefer to keep my intense feelings to myself.                                                      | Redundant to Q13 (r = 0.54)                                 |                                              |                                              |                                                    |
| Q3   | I don't believe in talking about my personal problems.                                               |                                                             | 0.66                                         | 0.67                                         | 0.67                                               |
| Q7   | I believe it's fine if I cry openly in front of other people. <i>(reverse)</i>                       |                                                             | 0.46                                         | 0.46 <sup>a</sup>                            |                                                    |
| Q9   | I believe in discussing my personal problems with family and friends. <i>(reverse)</i>               |                                                             | 0.55                                         | 0.55 <sup>a</sup>                            |                                                    |
| Q13  | I expect myself to hide my strong emotions from others.                                              |                                                             | 0.75                                         | 0.75                                         | 0.73                                               |
| Q15  | I expect myself to manage my own problems without help from anyone.                                  |                                                             | 0.61                                         | 0.61                                         | 0.62                                               |
| Q19  | If my emotions get very intense, I believe it's all right to just show them openly. <i>(reverse)</i> |                                                             | 0.49                                         | 0.48 <sup>a</sup>                            |                                                    |
|      | <b>Stoic Endurance</b>                                                                               |                                                             |                                              |                                              |                                                    |
| Q2   | I expect myself to hide my aches and pains from others.                                              |                                                             | 0.65                                         | 0.65                                         | 0.68                                               |
| Q4   | I don't believe in bothering people close to me with my aches and pains.                             | Redundant to Q3 (r = 0.57)                                  |                                              |                                              |                                                    |
| Q5   | I expect myself to manage my physical discomfort without complaining.                                |                                                             | 0.57                                         | 0.56                                         | 0.55                                               |
| Q11  | If I am suffering, I believe in telling someone about my physical pain. <i>(reverse)</i>             |                                                             | 0.54                                         | 0.55 <sup>a</sup>                            |                                                    |
| Q17  | I believe my physical pain is best handled by just keeping quiet about it.                           |                                                             | 0.62                                         | 0.62                                         | 0.61                                               |
| Q23  | I believe in letting myself complain about everyday aches and pains. <i>(reverse)</i>                |                                                             | 0.26 <sup>b</sup>                            |                                              |                                                    |
|      | <b>Stoic Composure</b>                                                                               |                                                             |                                              |                                              |                                                    |
| Q10  | I expect myself to remain calm and decisive in an emergency.                                         | Domain excluded <sup>c</sup>                                |                                              |                                              |                                                    |
| Q16  | I believe it's okay to let myself get upset and distracted in a major crisis. <i>(reverse)</i>       | Domain excluded <sup>c</sup>                                |                                              |                                              |                                                    |
| Q21  | I believe I should be calm and level-headed.                                                         | Domain excluded <sup>c</sup>                                |                                              |                                              |                                                    |
| Q22  | I believe I should stay cool and steady when the pressure is high and the situation is tense.        | Domain excluded <sup>c</sup>                                |                                              |                                              |                                                    |
|      | <b>Stoic Serenity</b>                                                                                |                                                             |                                              |                                              |                                                    |
| Q8   | I believe I should experience strong emotions. <i>(reverse)</i>                                      |                                                             | 0.51                                         | 0.51                                         | 0.48                                               |
| Q14  | I would prefer to be unemotional.                                                                    |                                                             | 0.70                                         | 0.70                                         | 0.71                                               |
| Q20  | I expect myself to avoid feeling intense emotions.                                                   |                                                             | 0.62                                         | 0.62                                         | 0.63                                               |
|      | <b>Stoic Death Indifference</b>                                                                      |                                                             |                                              |                                              |                                                    |
| Q6   | I believe it's okay if I worry about dying too soon. <i>(reverse)</i>                                |                                                             | 0.27 <sup>b</sup>                            |                                              |                                                    |
| Q12  | When the time for my death comes, I believe I should accept it without fear.                         |                                                             | 0.61                                         | 0.62                                         | 0.63                                               |
| Q18  | I would be very upset if I knew my death was coming soon. <i>(reverse)</i>                           |                                                             | 0.57                                         | 0.57                                         | 0.57                                               |
| Q24  | I would not allow myself to be bothered by the fear of death.                                        |                                                             | 0.78                                         | 0.76                                         | 0.76                                               |

Footnotes: <sup>a</sup> = Excluded for parsimony; <sup>b</sup> = Excluded for poor factor loading; <sup>c</sup> = Excluded for poor content validity and highly skewed response distribution.



**Table S3. Model Fit Statistics for Confirmatory Factor Analysis of the PW-SIS**

| Model        | Description                                                                                                                                                                                                                                                                                          | Chi square      | df  | RMSEA (90% CI)         | Goodness-of-fit Index (GFI) | Adjusted GFI | Tucker-Lewis Index |
|--------------|------------------------------------------------------------------------------------------------------------------------------------------------------------------------------------------------------------------------------------------------------------------------------------------------------|-----------------|-----|------------------------|-----------------------------|--------------|--------------------|
|              | <b>Step 2:</b> After exclusion of 2 redundant items (q1 and q4) and 4 items from the Stoic Composure domain (q10, q16, q21, q22), confirmatory factor analysis (CFA) was performed on the 4-domain, 18-item PW-SIS.                                                                                  | 318<br>p <.0001 | 129 | 0.06<br>(0.05 to 0.07) | 0.91                        | 0.89         | 0.86               |
|              | <b>Step 3:</b> After exclusion of 2 items with poor factor loading (q6 and q23), CFA was performed on the 4-domain, 16-item PW-SIS.                                                                                                                                                                  | 264<br>p <.0001 | 98  | 0.07<br>(0.06 to 0.08) | 0.92                        | 0.89         | 0.89               |
| <b>Final</b> | <b>Step 4:</b> Factor loadings from Step 3 were examined, and for the purpose of parsimony, 4 additional items were excluded (q7, q9, q11, q19). Items with the strongest factor loadings in each domain were retained. The resulting 4-domain, 12-item PW-SIS has 3 items in each of the 4 domains. | 103<br>p <.0001 | 48  | 0.05<br>(0.04 to 0.07) | 0.96                        | 0.93         | 0.93               |

1  
2  
3  
4  
5  
6  
7  
8  
9  
10  
11  
12  
13  
14  
15  
16  
17  
18  
19  
20  
21  
22  
23  
24  
25  
26  
27  
28  
29  
30  
31  
32  
33  
34  
35  
36  
37  
38  
39  
40  
41  
42  
43  
44  
45  
46  
47  
48  
49

STROBE 2007 (v4) Statement—Checklist of items that should be included in reports of *cross-sectional studies*

| Section/Topic                | Item # | Recommendation                                                                                                                                                                       | Reported on page # |
|------------------------------|--------|--------------------------------------------------------------------------------------------------------------------------------------------------------------------------------------|--------------------|
| Title and abstract           | 1      | (a) Indicate the study's design with a commonly used term in the title or the abstract                                                                                               | 1                  |
|                              |        | (b) Provide in the abstract an informative and balanced summary of what was done and what was found                                                                                  | 2                  |
| <b>Introduction</b>          |        |                                                                                                                                                                                      |                    |
| Background/rationale         | 2      | Explain the scientific background and rationale for the investigation being reported                                                                                                 | 4-6                |
| Objectives                   | 3      | State specific objectives, including any prespecified hypotheses                                                                                                                     | 6                  |
| <b>Methods</b>               |        |                                                                                                                                                                                      |                    |
| Study design                 | 4      | Present key elements of study design early in the paper                                                                                                                              | 6-7                |
| Setting                      | 5      | Describe the setting, locations, and relevant dates, including periods of recruitment, exposure, follow-up, and data collection                                                      | 6-7                |
| Participants                 | 6      | (a) Give the eligibility criteria, and the sources and methods of selection of participants                                                                                          | 6-7                |
| Variables                    | 7      | Clearly define all outcomes, exposures, predictors, potential confounders, and effect modifiers. Give diagnostic criteria, if applicable                                             | 7-8                |
| Data sources/<br>measurement | 8*     | For each variable of interest, give sources of data and details of methods of assessment (measurement). Describe comparability of assessment methods if there is more than one group | 7-8                |
| Bias                         | 9      | Describe any efforts to address potential sources of bias                                                                                                                            | <i>n.a.</i>        |
| Study size                   | 10     | Explain how the study size was arrived at                                                                                                                                            | 6-7                |
| Quantitative variables       | 11     | Explain how quantitative variables were handled in the analyses. If applicable, describe which groupings were chosen and why                                                         | 7-8                |
| Statistical methods          | 12     | (a) Describe all statistical methods, including those used to control for confounding                                                                                                | 7-8                |
|                              |        | (b) Describe any methods used to examine subgroups and interactions                                                                                                                  | 7-9                |
|                              |        | (c) Explain how missing data were addressed                                                                                                                                          | <i>n.a.</i>        |
|                              |        | (d) If applicable, describe analytical methods taking account of sampling strategy                                                                                                   | 7-9                |
|                              |        | (e) Describe any sensitivity analyses                                                                                                                                                | <i>n.a.</i>        |
| <b>Results</b>               |        |                                                                                                                                                                                      |                    |

|                          |     |                                                                                                                                                                                                              |       |
|--------------------------|-----|--------------------------------------------------------------------------------------------------------------------------------------------------------------------------------------------------------------|-------|
| Participants             | 13* | (a) Report numbers of individuals at each stage of study—eg numbers potentially eligible, examined for eligibility, confirmed eligible, included in the study, completing follow-up, and analysed            | 6-9   |
|                          |     | (b) Give reasons for non-participation at each stage                                                                                                                                                         | n.a.  |
|                          |     | (c) Consider use of a flow diagram                                                                                                                                                                           | n.a.  |
| Descriptive data         | 14* | (a) Give characteristics of study participants (eg demographic, clinical, social) and information on exposures and potential confounders                                                                     | 8     |
|                          |     | (b) Indicate number of participants with missing data for each variable of interest                                                                                                                          | n.a.  |
| Outcome data             | 15* | Report numbers of outcome events or summary measures                                                                                                                                                         | 8-9   |
| Main results             | 16  | (a) Give unadjusted estimates and, if applicable, confounder-adjusted estimates and their precision (eg, 95% confidence interval). Make clear which confounders were adjusted for and why they were included | 8-9   |
|                          |     | (b) Report category boundaries when continuous variables were categorized                                                                                                                                    | 8-9   |
|                          |     | (c) If relevant, consider translating estimates of relative risk into absolute risk for a meaningful time period                                                                                             | 8-9   |
| Other analyses           | 17  | Report other analyses done—eg analyses of subgroups and interactions, and sensitivity analyses                                                                                                               | 8-9   |
| <b>Discussion</b>        |     |                                                                                                                                                                                                              |       |
| Key results              | 18  | Summarise key results with reference to study objectives                                                                                                                                                     | 10    |
| Limitations              | 19  | Discuss limitations of the study, taking into account sources of potential bias or imprecision. Discuss both direction and magnitude of any potential bias                                                   | 11-12 |
| Interpretation           | 20  | Give a cautious overall interpretation of results considering objectives, limitations, multiplicity of analyses, results from similar studies, and other relevant evidence                                   | 10-13 |
| Generalisability         | 21  | Discuss the generalisability (external validity) of the study results                                                                                                                                        | 11-13 |
| <b>Other information</b> |     |                                                                                                                                                                                                              |       |
| Funding                  | 22  | Give the source of funding and the role of the funders for the present study and, if applicable, for the original study on which the present article is based                                                | 1     |

\*Give information separately for cases and controls in case-control studies and, if applicable, for exposed and unexposed groups in cohort and cross-sectional studies.

**Note:** An Explanation and Elaboration article discusses each checklist item and gives methodological background and published examples of transparent reporting. The STROBE checklist is best used in conjunction with this article (freely available on the Web sites of PLoS Medicine at <http://www.plosmedicine.org/>, Annals of Internal Medicine at <http://www.annals.org/>, and Epidemiology at <http://www.epidem.com/>). Information on the STROBE Initiative is available at [www.strobe-statement.org](http://www.strobe-statement.org).
